# Supplementary material for: Two different types of tandem sequences mediate the overexpression of TinCYP51B in azole-resistant Trichophyton indotineae
Source: PubMed Central journal article supplement (PMC10648874; doi:10.1128/aac.00933-23), 2023-10-12
Supplement: aac.00933-23-s0001.pdf [file aac.00933-23-s0001.pdf]

**TinCYP51B locus in TIMM20121**

[Read No.m64281e\_230311\_112734/112723290/ccs] [Sense (+) strand]

~TAT (Upstream sequence of the 7374 block)

AAT~ACC (5'UTR)

ATG~TAG (*chkB* protein kinase genomic DNA) (Forward sequence)

ATG~TGA (*TinCYP51B* gene) (Forward sequence)

TAA~GCT (3'UTR)

CTA~CAT (*FYV4* genomic DNA) (Reverse sequence)

CAAACACATTCTACTTGCATATTTGGCTGGCGAGAGGCTCAAGTTGTGAAGAGAAATAATAGGTATTACGATG  
CATCTTTGGTTAGATTTCAATCTTAAAGGCCGGCCTAGCTAGTTAGTTAATTGGGAGTTTGATGGCCATGAC  
TATAAGGACGCTCACTCCCGATTCCCTATGTCACCACACATCAGGGGAAGATGAATAGAGGAAGAGATAGAG  
GAAATAATCAGATAGAGAGACAGGGAAAGGGATAAAAAAGAAAGACAGACGAAGGTTTGAACGCGCGGCAAA  
AAGCGAAGCCGCAGCGCTGTCCACACGAATATTGTGTGGCCAATACGCTCCGGAAAGAACTTCTAAGTGGGTT  
ATTTGGCCTCTTCGCTACTAGACTTCAGTGTGACAGCATAACGCCCCGAATGGCTCTCGGGGCTGCGGA  
ATTGGTCGTCACAGGTGGGAACATGTGTGGGTACCGTTGACCAACTAGAGAGAGATGTGACTACTCAGTGATA  
AGTGGTGGTAGTAATGACTCGCAGATGCGAATGCTATTAATAAAATACTCTATATTAATCAAATAAAGTCT  
ATCAAGTTGCCCAAATGGCGGAAAGCTGAAGATATGAAACAAAGATGGTAGGACGGGAAATAGACTGCTTATG  
TCAAGTGGCCTGTCAATCAATAGGGGATGTTGTTTCGTCATGAGTTGGAACGATCATAGCCCTTGGTCGACAT  
GCTGGCGTAACTCTTCCTGATGAGTTCTCTCATATACTGCGCTGCCTCTTGTTCACTCTTCTCTAGGACAAAT  
CGGTGCGGAAAGTTGGTCAGCGTATGGGGTGTGAAGCAAGGAAGACCGCTGTCCAGCATGAGGGTTACGATGT  
TTGAAAGCTTCATAGTATAAGGTCTCGAAGCAAGGAAAGCTTTAACCACAAGTGATTGCAACCAACGGTAGGA  
TTGAGAGTTGTTGTACGATGCCGAATGAGTGGTGGATGTAGTAGCTGTAGAAGCTGTGGCTGAGGCAGCAGTT  
GACGAAGACGGATGGTATCCTCCCATGACAGCAATCATCTCCGTGGTCAGTTTGAACGGAGCACGCTCGAACC  
GTACACCACCAGGCGCAATATCGAAACAGAATCCAAAGTCAATGTGGATGATATGTCCTGCGTCATCAATCAT  
GATGTTGCCGTTATGTCGGTCTTTGAACTGCAGCAGGTATGAAATGACTGAATAAGCAGCCATACTCTTCACG  
AAGTTGCTTCGGGCTTCTTGAAATTTGATCGACTGCTCTCCTCCGTACTTCGATACGAAGTAGTCGTACAGGC  
CGTTGACAGCTTCACGGCCAGCATGTCTCGAGATATCGAGTTGGGTAAGACATCGATCACGCCGCATCCAGG  
GGCGGTGGCCACAACACGGTACGGGAAGACAAATACGTCTAATCCAACGCTCGAAATATTTTCGCGGAATGCA  
GCAATCATTTGAAGTGCGAGGACATCTTGACGGCAGTCATCTCCGACCTTGAAGATAGCAGACTGCCATACCT  
CATATGTCCCGCTTGAGACGCAGCTAGGCTCTCGCGTTTGCTTTGTACGGCGGATTCCTTAACTTGGGACAG  
CTGCAAATTCGCTTCCTCATGGCTAGCCTCTTCGGCAGGAGTAACGGCGTTGCTGCCGTCTTCAATATTCCTC  
GTCTTCTTGATTCGGAACGTTGCCATATAAGGTGCCTTTGCGTGACTCTGCAAGGGCTTTCGGGACTTTCGAT  
CGATGCCAACAACAACCCCATCTGGGTTACTTGGCAGGTACACGCCAACCTCAACCTTAATCTTTCGCAGCTC  
CTCCGTAATCTTCTCCTTCTTCTTGTGTTGGTGCCTTTAATGTATGGCCGTAGTTTGGCCGAAATACCGGTG  
ATCTCGTTGAAGAAGGCGAATTCCTCTCATAGAATCTTTGTCTTCGTCCGTGAAGCTTGAATAACAGAGT  
CCATGAATCGGTCCAGCACCGGTTAAGTGGATCAGGCTATTTTCTCGTTAGCATGACATTTGGATATCCATA  
ACACTAATCAAGGTACTTACAATCTGAGAGTCTTCGTCCCTGTAGGCGTTTGCCTTCATATTCAGATGACTT

GGTGGGCAAACATCTGTGACAGCTGAGCTGTATTTGAAAGGTAACGTTCTATATATATCCCAGTGCATCATAGCG  
AAGGGCCTGCACGAGCTGCGGAACATAGAAAAGGCCAACATCCACGGGGAAGCTCTCGAGAGATCGAAGGGCA  
TATTGCAAGATGAACGGATGGTTACCATATGCTGGTAACAGATAAGTTACGGCTGAGATCGGATCGATCGGCT  
CCCAATAGAGGAGGTACTGCATTGCCGTTAGGAGAGTGAAGACACACCTGGGGGTAAAACGCGAAACTTACCT  
TGAGCTGGAATGAAACGTCCTCTGGAAGAGCTGACCCAAGTAGAATTTCCAAAGCATTGGCTCCTTAAGTGC  
TTTTTCCGGGAAGTTAAGTAGAAGCCATCGGATATCAGTTCGCAGTTTAGCAGATGGGAACCGTGATCCTAGC  
TGAGGTGCTAGGCTTGGGTTTTTCATTCCATGCCAATCGAAGAAGTCCCGCAACGGTCTCCTAAAGCATATAAT  
TAGCCACTGGTTGGCCCCGAAACAGTGATGTAAGGAACGTACCTCGGTGACGGTTTTTGTACCAGTTCCATAGA  
AGAAGTACGATTTCTTTTCTAGGTCTAGTGGAGAAAGCCAGACTTTGAGTCGAGAGCGTTCATTTCCAATCAG  
AATGAGGAGTAGATCGTGCTTTGCTTGTAGTGATTTATGAGACTTTGAGTCCACTACCTCTTTCCAAGACAAG  
GTCTCCAACATAGATTCAATATCGTGGAGGACCTGATCTTCAGCTTTGAGCTGCAAGCGATTCCCTCCAAACG  
ACCACCTAAAAAATGCTTGGTTAGCTATCTTCTTAGGAAAGTGAGATTAATAATGATAACGTACCTTGGCGAGTG  
GTTGAACCAGCTCAGTGCAGCAGAGAGAATTTGATCTTTGAGCTTCCACGAACCAACATTACTCTGTCCGGAG  
AATGAATGGAGCACCTTGAGACTGAAAAGGATGATATGGAAGTGAATCTCGCGAGCTAGCGGGTGGCCAGTAG  
AATCCCTCAAGGCCGCCAACGTCTCACTGACCAGGCGTCTAAATACCTGTTGCGTATTTAAGCTGCCTAGCCT  
ACTTGCCTGAAATGGCTTTCTAGGAACTGCAAAACCAAGAAATGAGGAGATATGATGTTTTGGGCTTTCTTA  
TGACGCCGGACAATCGCTTCCCTTATCGGATGGGGATGATTCAGCTTGTTCATAAAGGGATTTTTTATGTCTAA  
AAAACGTTAGTTAGTCAGGGCAGGATGCAAGGAAACTGAGAGAAGATAGCTTACTTGAAGTTCGGATCGAAGA  
TTCTTGTCTTGCAGCAATGGTACGTTCCCATGCCTGCGCTACTTCTACCAATATTCTGGATTCCATAGCTGG  
TTTTTCATTGATAACTCCTAGCCACAGAGCAATTTCCCATCCTGATGGACTCCTTGGTAAATATCTGGAAGGGA  
ATGCTGACTAGGTAAGCAATAATTGCCGGATGGCTATCATCAGTATTACACAAGAGAGCAGCAGTGCGGCGGA  
GAATATGCCGAGGAAGATCCAGCGAGATATGCTTCTCTGTTCTAATTTGATGCTCGAGAGCTGCGAGAGCTTC  
TTGTACAGTGTGAGGGTAATCAGTCAACCGGGCGGTGGTGTCTTTGACCTATTGAAGATATTAGAAGGTTGGTT  
CAATGGCTCAAAATCAGACATATAAATACCATAGGATATCGCTAGAGGAGACTTTTCTCTGCGAGCTGGGCGGC  
TTCAGAGTACCGTACTCTTGTGAGTGGTATACTGAGAAATGAAGTCGGAAGCAACATTGAGAACAGTGCCA  
CCTGGGTTATCAATTGATCCTATCAGCTGTTAATGAAAGCTCAGAGCATAAATTATTGATATAAGAACTGATA  
TACCTAGTCGCTGGTCCGCAAAAGGGATTGCTGAGCCATCTCAAGTGCTAACGAACGGCCCATGTTTATATT  
GCCGTACACGCCATCATCATCGTAATCAGAAAGGTACGTCTATGAAAGAACATATATTAGTGAAGTTGATGGC  
ATCGGTGGGAATAATAACTCACCTGCAGTAGCCCTTGATATCTAATGGTGCAGTGTTCATAACATTTGAGAT  
CCAAGTGCAGCTGAGTTATGGAGATTCTTCAAGGTACGTCTCCTGAAATCATAATTGTCTGATAAAAACAACC  
TGGACCGTCCGCTGCTCGATGTGAAAGTAGAGTTCCATGCAAACCTCATCCATTTCTCGTCCATGCACGATG  
ACCAGAGCAAAGTAATCAAATCAAGCAGAGTAAACAACGAGAGTTTCTGGCAAAGTGCTGACGGGCATTGCAT  
GATTATCTTATTTGCAGCTAGAGTAGAGTTTGTGGACTTGGATGATACGATGGCAACAAGCAGTGAAAGTA  
TCAGCTAGCTGTTTGGCAATATAAGGGGCCGAGAATTTACGGATGTGCTTCGGAGAGTTTTCTCAAGGTAGA  
CGGTCACAACCTTGTCCGCAATTGCTCTCATGCAATTGCCATTTCCGAGGCACCCAAGGTTGGGTGAGGAA  
GTATGTGAACACTTTGGTGCAATCACCAGAATTGGCACGGAGGGTTTTCTATGAGTAGCGTTGCATTGAGAAAG  
AGCGCCTTGGGGTAGTTTAGGCGTCGGATATCATGTTCTTGTGCCGGCAGTTCAGCAGTCAGGTTCTTTTTCT  
TTCAACGGTTGTCTGAGGGCTCTGGCCGCGTCTTAGAATTGTATTTAATTCAATGTCACTCTCGAGCAGTTCA

GCACGGTTCTCGGAGACTAGCGGAGGAGAATGTTTCGGCGAGGATACGTAGTTGTTTCGTAGTTTCGCCTTTCCAA  
GCTCTGAGTGAAGTGATATATCATGGGCTGCGATGTTGAACCACGCATCCCGGAGCATATCTGTGATATCATC  
ATCGTCACACACCCCAGAGGCTAATTGATCTAAGCGGCCCTGCCCGGCTAGTAGTATAGCAAGAGGTTTCAAT  
ATTGGGGCAATTTGTTTTAGCAGTTGCCTCAAGATCCTCTGGATGAACCTTTTTCGCGTTTCGACCGCAGCTCCCT  
GGTTAACTAAGCTCTCGAGGAGGAACACAAGATAAATCTTGAAGACTTCACTGTTTTCGGTTCGAGGTTGGCTGC  
AAGGTAATTTCTTGCTTTGTGTATCTATGTATACGTTAGAATTCCCCTGACAAGGTGCAACAGCTAGATGAA  
AGGGGGCTTGGACTACATAACCGCCTCCAGCATGAGGTTATTTCCCTGAGCAACAGTATCTCGCAGTAGACGA  
GAATAGAACTTTAGCAAGAGACGGAACCTCCGCAGGCTCACTCTTCAGCGAAAGAGCCGCAGTCTCCTGGATAA  
TGTATGCATCAACTATGACATTCGCCTTGCCAATCTTCTGCACCAGAATGGACTGTGCAAGGGCAACGATCTT  
GCTATCTTCACTATAAGTGGCGATTGTTACAATGGCATGTACCACATTTCTAGCTGTGACGGAAGTATCCCC  
TCCCCATCAATAGCAAGGGATAAGAAGCTCTCATTTCGTGGGGGAGCACGGTTCTCTATCGAATGAGAATAGC  
CAGTGCCTGACTCGGCAGTTAGAGCGGTGGCAGCCTTATCAGCTGCCGATCCGGAGCTAAGGACGTTTCCGAG  
AGAATATAGGGTGCCTATGACGGTATCTTGGGAAAGAAGCCGGAGGTTCTGGGCCAAACATTGGGCAGCCAGT  
GCGACGACAGGACTGCTTTGGCCATTTTGGACAATGAAGCGAAGAAGAGAGCGGGTTAGGCCGTTTGCCTGC  
CTCGGGATAGCCTTGCTAGAATGACAGCAGCCTTAAGGACAACGGTAGCTAGGTCTTGTTCATCATTGGTC  
TGGATCTGAAATGGTATTGTCCAGGGATGTGAAGAGCAGGTCTAGATCCACTGAATCCTGGTCAACCATGATG  
CAGTTGATCGAGCACATTATCGACAAAGCCTTGACCAAGAATGCAAGGCGTTGTTGCCAAGTGGAGCTGACTT  
GTAGGTAATCCGACTCTTCTTCGAGGAGATTGATCTGGTCACCCGCGATTTCTGCGGCGTATTTTACCAGGCT  
AATCATCCCGCGGTCTGAGGCTTTAGCTACATAACCACTGTCTGCATATCGGGAGAGAAGGGTATCATCTGGC  
AGCGGTGGGGTTTGATCATTTC AACAGGAGATGTGCAGGACTTTAGAAAGCCCATGAAAGCCTGTTGTAGCA  
ACATGGAGCCAAGGGGTTCGTCCGTAGCCGCATACTGGCGGGGTGTACCGTCTCCAGTCGTGCAGCAGAGGAT  
CTGGAGAGCGAGAGTTCCGTATGCCGGAAGAGATGGTCTCCACAGCTACCAGGAACCGCTCTGATAGAATGAT  
GTGTAAGTCTTTACAATAGCAAGGCGATCCAGCGGTGCCCAAAAATGGGGGAATTCGGACGAGGCCCGGAGA  
AATCCCCTAGCGATACCATTAGAGTAGTCACATCCGTAGATTTCATGGCTCTCGACCTGTATCCCTGTCCCAT  
CTGCATCAAAAACGGCCGGCAGGCGGTCTGTTGCCTGGTGACAATTTCTCCAAGTACTCGTCAATGGCTTCGTG  
GACGTCATCCTGCAGCGACTTGTGCCTAGAGCCAGTGAAAGCAACGCCGTAACCACATCATGGGTCAAGGTC  
TCCCACGGCGAGGGTTTGTAAATATGTAGGAAAGGAGACGAATGGATGCGGAGCGTATGGAGCGTAAGCAGGT  
ATCCGACCAGTAGAGAAACCAGCTTTGCAGCATGGTCACCACGCTGAACAGAGCCAGCTGCCTTGCACAGAGC  
AAGCAGTACGTCTAGTTCTCGAACCCCTATCTTCCCTCATTAGCCACTTTCTCGCGCATATGCCATTGAAGGA  
GGGGTGTGTGTATGTATTGAGGCAGTAAAAGGGGGGGGGCAGTACACTCGAGGCGCAGCGAGCCTGGGAGCCA  
CTGGAAGCCGCTTGGAGCCATTGCAGGCACTTATGAGCCTCTCGACGCTGAATTGCCCTGATCATCGTCCT  
GCCGGGGGTGTTTTGTGGCTAGTATCGCAAGTTTCTCGAGCGCCGCACGCCGATATACGATGGTGAATGATG  
CCTGAAGCTCTCCCCGGCGGTTAGTTAGCAAATGTCTGCGCCCAACGTAGCACCAACACAGGGCGAGAACAC  
CTACATATCCGGTCAACCAGCCTCGCCGTCATCCAGGAGGCCTTTCTTTTTCGTGGTTCCAAGGGGTGGGGAT  
GCACCGAACGTGCAGTCGTGTGTTTTGGGGCGTGGTTCAGGAGTGTATCAGAAGTGCTCTGCCTGTGGAGAT  
GCGAGTCGCTGGTAGGATCAACCCGCCAAGCCGAGGCCCGTTTAGTGACGCCGGGGCAGAGAAACGACTGGGC  
AGCAAGACGGCAAAGCGAGAGAGATGCATGAAAGGGCATTTTGATACACTCGATACGGACGCAGCCAGGGTTG  
CCAAC TTGTTGAATTACTCTGGACAAGCCACTCTTCCCTCTACAGGGTTTTTCTCTTTCGCGCCTCCGGGCCTGTC

TCTGTCTCCCGGGGGTTGAGCCCGCTACATGCAAGCCAGGCATTGAAAAACAGTCTGCGCGAGAAAACCTCG  
ATGATCGACTTTTGTGCCTTAGGCTATGATACGGAAATGCTTTTACAAGATAGCTGGATATTTGCATCCAAGC  
AGGAGTTGAAATAACACAAAGTGACGAAGGCCAAAAATAATAAGAAACTGCGGGATGCGGCTCTAACGGGCGG  
CCAACCTTATATAAAGAGCGACTTCGCATCTTTCGACAGAAAAAAAAGGTCGAGCAAGGGAAGTTTCGCTCAGC  
CTGGCCTGCCATTGACTCTAAGCGCCGTCGTTCTCTTGCTTGGGGGCTTGCTGCAGCTTGGCCTGGGCTTGTC  
CGGCCTGGAACTCAGGGAGCCGAAAGATAACTAGTTATTTATTTTCGTCTCCGCACACCTCGGCGGCTGTCTCA  
TAGTCGGGATATACATAGTACGGGGTAGCAGGTAGACTCACACGCTGCCTCTCTGCTGAACTGCTTCTACC  
ACCTTCGACAGCGACACTGTTCCGGTCTTGCAACTACGGTAGAGTGTGTTGGGGCTTGATCTTGCTGCCATCG  
ACTTGAGTTGAAGTTGCGAAGCCATTGGCAGTCCATCCGGGATATTCGTAAGTCCCGTCAACTTCTTACGC  
CGGGCCAAAAC**ATGCCTCCGCAGAGGGAGAGAAGCAATCTGAAGAGAGAAAGGGTAAGATATGAACACGTTAT**  
**ATCCAATTAGTTTCTCAGAAGGATGAAAATATTCAGCTGCTAACTTCTTTTCCCAAACCTGCAGGGCAACGC**  
**AGCTCCAGACCATGAATCAAAGAAGCCACGGAGATCTCCTCGAATCTCATCTCAATTGCAGCAGGATGCCGGA**  
**TATCTACCTTCTCCCCTAGCTAATGAAGTAATCTCAGAAGAAAAGCGTGAAGTTGCTACAGTTTCTCCCCAG**  
**AAGGCCGCCGAAACCAGGCGCCTCGAGGTCAATCGCCAGACGAGTCGTTCATGTCCCACCCAGGGTTTCTCTCA**  
**GTATCCCCAATCCAATCCATTGACGATGTGGAAGACGAGGTGGCCAGGCATATGGGGATATCTTACTCCG**  
**CTAGATAACAATTTTGGAGGCCAATTGGTTCTGAAGAAGCGGGACAGCACAAATACTACACCGGTAATTGGAG**  
**CAGCATCAGACATATCAACGCCGAAAGCAACGCCTCAAAACGTGGAAGTGAAGAGATAAACCAGCGCTGGATA**  
**TCTTATAGGCGGCATGCAGAGTGCGGTATGCCTTTACCCATTGCATACTCTCTGCCGTCTAGTGATCAATTGC**  
**TAACCATCTGGGTACTGCAGATTTTCAGGATCAAGCTCCCCACGATATCCAACCGCCATTGCCTGATATTCAC**  
**GAAAACAGGGGAGGAGACTTTGTTGCAATTGTGGAAGATCTCTCTATCAATGGCACTTTCATCAACGACGCCA**  
**TCATCGGCAAGAACAACGCCGAGAGCTCGAAAACGGCGACGAGATTACCATCCTGCAAGAATCCAGATTCAT**  
**CTTCAACTACCCGCGGAGTCGGAACACAAGCAAGTTCCGACAGCAGTATAAGCTCTTTGATATGCTGGGTAGG**  
**GGCACTTTGCCCTCGGTTTATCTATGCGCTGAACGTTCTACGGGGATCAAGTATGCCGTCAAACATTTTCGAGA**  
**AACGCCCGGGCGCAGTTCAGAGGCTAGACCGTGAAGCACTACAGCAAGAGATTTCAATGCTGATGAGTGTCAA**  
**CCATCCGAACATGCTGTGCCTAAAGGATACCTTTGACGAGAGCGATGGTGTCTTCCCTGATTCTTGAGCTTGCG**  
**CCAGAGGGCGAACTGTTCAACTGGATCATTAGGCATCAGAACTCAGCGAGGAGGAGACTCGAAAAGTATTCA**  
**TTTTCAGCTTTTTGAAGTTTTGAGATACCTGGTATGTCGTTTCGTTTTCTGGTTGATCAGACTCATGGCAGTGTAT**  
**ATGGCTAACCGTTGTCGTAGCATGAACGAAACATCATTACCGTGACATAAAGCCAGAGAACATTCTGGTTGT**  
**CGACAAAGATCTTACCGTAAAATTAGCAGACTTCGGCCTTGCAAAGATTGTCGGCGAACACTCCTTTACCACC**  
**ACGCTGTAAGTTCACCTACCTTCTGCCGTTCAAATCTGGGGTCAATCTTACTAAGAGATCATAAAAATCTAGAT**  
**GTGGAACGCCTGGCTGTAAGTTTCCCTGCTGCTCTGTTAACGCTGGTGCTTTCATCCACCAAATGTGAATCTA**  
**ACAATTCTTATCAGATGTTGCTCCTGAGATACTGGCAGAAAACGCTGAAGCCAGAATGTACACCCGAGCGGTT**  
**GACATCTGGTCACTCGGAGTGGTACTCTACATCTGCCTGTGCGGATTCCTCCTTTCTCAGATGAACTGTACC**  
**ACCCAAGAGACTACCCATACACTCAGAAAGAGCAGATCCAGCTCGGAATATTTAAGTATCCTCTTCCATACTG**  
**GGACTCAATCGATTATAGAGCCATGGACCTTATCGACTCCATGATCGAAGTCGACGTGAAGGAGCGTTTGA**  
**GTAGATGAGTGTCTCCAGCACCCATGGATCACTGGCATCGACCCCGATGAGCCTAGGGTGGCAGACAGCACCG**  
**ATGACCTAGCCGGGGCCATCGGTGGCCTGAGGGTGTCCAAAGAACGCCGGCCAACCTATGGTCCGCAGGCTGTT**  
**GAGTGACATACATGAAGTCACGGTCAAGCAGGTGGTGAAGACCAAGGAAGACGACCCTGCTTCCAGGACATA**

ACTATATACCAGAATCATCCTGTGCCTCGAGCCCAGGAGCCCAAACCGGCTGGCAACCGGAACTCAAAGGAGT  
TCATGGAACCTCGGTGGAAGTGGAGACCAGGTGTTATTTCGATGAGCAGTCTGACGACTCGCTGGAGCTTGAGAG  
TGAGGCACGGAAGCCAGTTGTCCACCAAGACGACGCAGACAAGACTCCACGAGAAAGAAAGAGG**TAG**CAGAAG  
CCCGATCCGTCTTGGGATGGTATTCTGCTAGCTATAACCGTGTATTCCGGACTTTTGTTCCAATTCCTTTTT  
CGTTTATATTGATTGTGATCTTTCTTAATTTTTTCTTTAACTATAACCCCCGGTTGAAAGGTGATAGGGGCC  
AACTAACCGAAAAGCAGCAGAAAAACCGGCTTGGTCGCTGCCTTGGAGACGACGGCGATTCTCGTGTTTAGGA  
TTTCATTTTTTGAGTGATATAACTATGGGTACAATAGCGTCCACTGGGCAATGTAATTACAGTCTCTTCTCACT  
CACCACCGGACAATAATAACAATATTAATATTGACGGACCGTTGATAGCTTAACCTGCCATGACTAAGCCGGC  
CTCCCTGAAGCCGCGATGGCCTGATGATGCGCCACCGTCAGGTCTCGCTCGCTCAGGCAGCAGAGAATCCAG  
CGGAGGAGATGACGCCCTGCACGAACACCGTCCAGGGACCGTCTCCGCCCGTCGCGAGCTCGAATTGTAATC  
ATCTCGACGGCCGTTGGCCTGCTCGCCGCAAGGGAGAAAAAGGGGGCAGAAGGGCAGCGTAATTTTTGGTAT  
TGGAGATGCAGCTGTAAACCAATAAAAAACGACGTAAAAACAGGAACAATGCATTATCTTACAGTACCGTAC  
GCCCTTGATAAAATGCGAGTTCGATCTCAAGATGCAACTTTTTTTTTCCCTTGCTTCGTCCGCAGCAGCTT  
CAAGGCATTCATCACAACAACGAACAAGTCTTGAGCGGAAGCAGGAGGATAAGACGATCACC**ATG**GGCCTCT  
TAGCCGACATTGTCTCTCGTTTCTGCGAGAAGTGTCTGACCCTGTCCACCGCCGCGCTCGTCGCAAGTGCCGT  
ATCGGCTTTTTATCGTCTCTCCATTGTTATCAACGTCTGCAGCAGCTCCTGTTCAAGGACCCTACAAAGCCT  
CCGGTGGTCTTCCACTGGGTTCGGTCATTGGAAGCAGATCTCCTATGGAATTGACCCGTACAAGTTCTTTG  
ACGACTGCAAGGAGAAGGTTAGTTGGTGCAATTCAACTTAGCTATATACCAGGTTGCGCAAAGCTAACGTATA  
AATAATTTCCGTACTCTAGTATGGAGACATCTTCACATTCATACTGCTGGGCAAGAAGACGACTGTTTTTCTC  
GGTACAAAGGGAAATGATTTCATTTTGAACGGCAAGCTCAAGGATGTTTGC GCGGAGGATGTCTACTCCCCCT  
CACCACCCAGTGTTCCGACGACATGTGGTGTATGATTGCCCAAACCTCCAAGCTCATGGAGCAGAAGAAGGTG  
TGTACAGCAATTTATTCCCGTCTACATCTCCTGGGCCTCCATTGCTAATTTAATCGTCTACCAGTTCGTCAAG  
TTCGGCCTCACCTCTGAAGCTCTCCGATCCTATGTCACCCTGATCACCAAGGAAGTTGAGCAGTTCCTCGAGT  
CCTCCCCCGTCTTCAAGGCGACTCCGGAGTTTTCAACGTGAGCAAGGTCATGGCTGAAATCACCATCTACACC  
GCCTCTCGATCTCTACAGGGCAAGGAGGTGCGAGGAAAGTTCGATTCCAGCTTTAGCGGAACTCTACTCCGAT  
CTCGACATGGGCTTCGCCGCCATCAACTTCATGTTCCCATGGTTCCCTTCCCACACAACCGCAAGCGTGACC  
GTGCTCAAAGAAGATGGCCCAGGTTTACACCGACATCATCCGTGACGACGTGAGGCTGGTGGAGAGAAAGA  
CTCCGAGGACATGGTATGGAACCTTGATGTGTCGTCGTCGTAAGAATGGAACGCCAATTCAGATATCGAAGTC  
GCCACATGATGATTGCTCTTCTTATGGCTGGCCAGCACTCTTCTTCTCCACCGGCTCCTGGATCGTCTCTCC  
GCCTTGCCAGCCGTCCAGATATTCTCGAGGAACTCTACGAGGAACAGAAACGTGTTCTCGGCGAGGATCTTCC  
ACCACTCACCTACGAATCTCTCCAGAACTTGATCTTACAACAATGTAATCAAGGAGACTCTCCGCCCTCCAC  
GCTCCCATCCACTCTATCCTCCGTGCTGTTAAATCCCCTATGCCCGTTGAAGGAACTAACTATGTTGTCCCAA  
CCTCTCACAACCTCCTTGCCGCTCCTGGTGTTCCTCACGAGACCCTCAGTACTTCCCTGACCCTCTTGTTTG  
GAACCCTCACCGATGGGAGAAACAACGTCCGGTGTACCGTAGTCGAGGCCAGTGAAGAAAAGACAGATTACGGA  
TACGGTTTTGGTTAGCAAGGGTGCCAACAGCCCTTACCTCCCATTCCGGCTCAGGCAGACACAGATGCATCGGTG  
AACAAATTTGCATATGTTTCAGCTTGGAAACCGTAACAGCTACGTTAGCCAGACTAATGAAATGGAAGCAAGTTGA  
AGGCACCAAAGATGTTGTGCCGCCAACTGACTATTCGGTAAGTTTGGCATATTACGCTCCTTTTTTATTTTGCT  
CGATTTTACTAACTTTGCATTAATAGTCCCTCTTCTCGAAGCCCCTTGGCGACCCAATGGTCTCGTGGGAGAA

GCGAAAGCAGCCTTCCCAGAAATGA TAATCACGACTGCGGATTGAATCATGTTAAATTTCTTGCTTCTTGCTA  
ATTTATTTCTTCTTTTTCTTACGTTTATACACCGAGCCATATTTGCACTTTATGGTCACGCAAATAGGTTTT  
CGGAATAGAGCATATGTAATAAAAACCTTTCTTTTGACCATGCTTTTGAAGATGGGGGATGTAGATAATAGTAT  
TATTCTAATACAGCCATTTATTACAATACTCTAGATGAACAGGAAAGTTGCAGTTACTCCGTTAGCTTTGGTG  
CAGAAACAAAATGGTAATATACATTGGAAAATAGTACATCTTCCCCTAGCTGGGATAATCTAGCATCTAAACAG  
CGATATCCAAGCCAGTAATGTCAGGAAGTAACCAGCCAGCAACGTCGTTAATCCCCTGCCCCCTTTCAACTCC  
GACGCTACAAAACGCCTAAGCAGCTGCCTGAGCATTCTCCTCTCCGCCAACGCTCTCTTCGCTCTGATCTCC  
TTCTGTCTTCTCTGACCACCGTCAATCTTTCTGCCACGCTTATGCTCCCACATGCCATCAGTAACCTGAACCT  
TGACGGCGGTACTCCATGTGTTTGGAAATAATCTGAGCATAACGGCCCCTTGATCATATTCCCCTGGTGCAATTT  
ATAATGGGCAAACCTTTTTGAGTGGCTTGGAAAGTATCCTTGAGCTCTGTTTCGCCTGGTGGTAGATTGACAATC  
GCATAACGCATTCCAGGTGTAAGGGTAGCGGTGCCATTGTGCTAACATCTAGGGACTCTCCGTCGGTGGCAT  
TGGTAGTTTTTGCACCTCTTTGACTTTTTCGACGGGGACCTCAACAGCTCTCAGCTCAGCAACACCGTCAACAAC  
GTTTTCGAAATCACCTCCTGGGCCGTAGTCTGCTGTCTGAATTTCTCTCTCCACCGCAGTATGTATCGTCTG  
TCCTTGTCATTTCTATGCCCAATTCTCGAAGCTCAGCCGAGTCCGCTGTAAACAATTGCTTCCATCCGGTGAT  
TTTGCTGGAATATCTGGACATGTTTCGCCCAATTAGGCGTAGGAATGTTTCGACATCGGGCACGAATGGGGTA  
GGTGATGGCACTGTTGCGGGTTTTTCGAGATTGATGAAGGTACCGTACGCATGGCTGATAATGGGGGTTTGTGA  
CGGAAGTGAAGAGCCGTAGTGGAAAGGGATGTTCTGGCATTAAAGCCCGGTATGCGCGCCGCAGCCATAGTGGT  
TATATCGCCTTATATCAAACCGTTCAATGTCGAGATCTGGGGGGTGAAGATTTTAATTTAGCTCGTGGTGTAA  
GAACACCATCGGGCGGGCGTGACGAAAGCGAAAAAGCCACGGCACCAAGGGCCAGGTAAACCGGTAAGGGAC  
TCAAGGCGAGTCAATCCAATGCTCAATGGCGCTGTATAGAAGATGTTCAACTGGTTCTTCGACTTCGTTCAAG  
ATTTTGACCAAATTTTGAATTAGGTCCGACGGCCTTAGCTCGGATCAACAAAACGCCGATCTCCGGTGAGC  
TCGGGCCAGCCGAAGCTTCCATCGCAACATTCAAAGATGAAAGACGACGATATATATTTTGATAACAAACAAA  
GCTGTATTGTTGATTGAATACTAGGAGAGCTGCTCAGAGCAGTGTCTCACTCTTGTGCCACTCTATCCTTTGT  
CTCGCGAAATTGGTGGAAAGCCAATTTTCGCTTGACATTATGGCAGTGTGCGCGCTTCCCTCTCAATTCCCTCCC  
ATCACTACTACCGGTGCTCCAAAGTCGTTAGCGATGAGAAATATTGCTTCTCAAGAGCCTCGGACGGCGCCTA  
GTGGTGATCCTGCAGTTCCTAAGCCCTCCATGCCCGAACCCAGAGCTGGCGGAGCAGTTAAACGCTGATGTACG  
GCGGAAATATGTCAAAGGTGGGCGGGCAAATACCCCCAACCTTGGGACCCATAATGCTAACATTTGGTTA  
TTCTGAAAGATAAGAAGCTCGGTGAAGGTACATATGCAGTTGTTTACCTAGGCCATCTACGAGATGATCCAC  
TTCGCTAATAAAGAGCGACTTCGCATCTTTTCGACAGAAAAAAGGTCGAGCAAGGGAAAGTTCGCTCAGCCTG  
GCCTGCCATTGACTCTAAGCGCCGTCGTTCTCTTGCTTGGGGGCTTGCTGCAGCTTGGCCTGGGCTTGTCCGG  
CCTGGAACCTCAGGGAGCCGAAAGATAACTAGTTATTTATTTTCGTCTCCGCACACCTCGGCGGCTGTCTCATAG  
TCGGGATATACATAGTACGGGGTAGCAGGTAGACTCACACGCTGCCTCTCTCTGCTGAACTGCTTCTACCACC  
TTCGACAGCGACACTGTTCCGGTCTTGCAACTACGGTAGAGTGTGTTGGGGCTTGATCTTGCCTGCCATCGACT  
TGGAGTTGAAGTTGCGAAGCCATTGGCAGTCCATCCGGGATATTCGTAACGTCGCTCAACTTCTTACGCCGG  
GCCAAAACATGCCCTCCGAGAGGGAGAGAAGCAATCTGAAGAGAGAAAGGGTAAGATATGAACACGTTATATC  
CAATTAGTTTCTCAGAAGGATGAAAATATTCAAGCTGCTAACTTCTTTTCCCAAACCTGCAGGGCAACGCAGC  
TCCAGACCATGAATCAAAGAAGCCACGGAGATCTCCTCGAATCTCATCTCAATTGCAGCAGGATGCCGGATAT  
CTACCTTCTCCCCTAGCTAATGAAGTAATCTCAGAAGAAAAGCGTGAAGTTGCTACAGTTTCTCCCCAGAAGG

CCGCCGAAACCAGGCGCCTCGAGGTCAATCGCCAGACGAGTCGTTCATGTCCACCCAGGGTTTCTCTCAGTAT  
CCCCAATCCAATCCATTGACGATGTGGAAGACGAGGTGGCCAGGGCATATGGGGATATCTTACTCCGCTAG  
ATAACAATTTTGGAGGCCAATTGGTTCTGAAGAAGCGGGACAGCACAAATACTACACCGGTAATTGGAGCAGC  
ATCAGACATATCAACGCCGAAAGCAACGCCTCAAACGTGGAAGTAGAGAGATAAACCGCGCTGGATATCTT  
ATAGGCCGGCATGCAGAGTGCAGTATGCCTTTACCCATTGCATACTCTCTGCCGTCTAGTGATCAATTGCTAA  
CCATCTGGGTACTGCAGATTTTCAGGATCAAGCTCCCCACGATATCCAACCGCCATTGCCTGATATTCCACGAA  
AACAGGGGAGGAGACTTTGTTGCAATTGTGGAAGATCTCTCTATCAATGGCACTTTTCATCAACGACGCCATCA  
TCGGCAAGAACAACGCCGAGAGCTCGAAAACGGCGACGAGATTACCATCCTGCAAGAATCCAGATTCATCTT  
CAACTACCCGCGGAGTCGGAACACAAGCAAGTTCGACAGCAGTATAAGCTCTTTGATATGCTGGGTAGGGGA  
CACTTTGCCTCGGTTTATCTATGCGCTGAACGTTCTACGGGGATCAAGTATGCCGTCAAACATTTTCGAGAAAC  
GCCGGGCGCAGTTCAGAGGCTAGACCGTGAAGCACTACAGCAAGAGATTTCAATGCTGATGAGTGTCAACCA  
TCCGAACATGCTGTGCCTAAAGGATACCTTTGACGAGAGCGATGGTGTCTTCCCTGATTCTTGAGCTTGCGCCA  
GAGGGCGAACTGTTCAACTGGATCATTAGGCATCAGAACTCAGCGAGGAGGAGACTCGAAAAGTATTCAATC  
AGCTTTTTGAAGGTTTGGAGATACCTGGTATGTCGTTTCGTTTTCTGGTTGATCAGACTCATGGCAGTGTATATG  
GCTAACCGTTGTCGTAGCATGAACGAAACATCATTACCGTGACATAAAAGCCAGAGAACATTCTGGTTGTGCA  
CAAAGATCTTACCGTAAAATTAGCAGACTTCGGCCTTGCAAAGATTGTGCGCGAACACTCCTTTACCACCAG  
CTGTAAGTTCACCTACCTTCTGCCGTTCAAATCTGGGGTCAATCTTACTAAGAGATCATAAAATCTAGATGTG  
GAACGCCTGGCTGTAAGTTTCCCTGCTGCTCTGTTAACGCTGGTGTCTTCATCCACCAAATGTGAATCTAACA  
ATTCTTATCAGATGTTGCTCCTGAGATACTGGCAGAAAACGCTGAAGCCAGAATGTACACCCGAGCGGTTGAC  
ATCTGGTCACTCGGAGTGGTACTCTACATCTGCCTGTGCGGATTCCCTCCTTTCTCAGATGAACTGTACCACC  
CAAGAGACTACCCATACACTCAGAAAGAGCAGATCCAGCTCGGAATATTTAAGTATCCTCTTCCATACTGGGA  
CTCAATCGATTATAGAGCCATGGACCTTATCGACTCCATGATCGAAGTCGACGTGAAGGAGCGTTTGAAAGTA  
GATGAGTGTCTCCAGCACCCATGGATCACTGGCATCGACCCCGATGAGCCTAGGGTGGCAGACAGCACCCGATG  
ACCTAGCCGGGGCCATCGGTGGCCTGAGGGTGTCCAAAGAACGCCGGCCAACTATGGTCCGCAGGCTGTTGAG  
TGACATACATGAAGTCACGGTCAAGCAGGTGGTGAAGACCAAGGAAGACGACCCTGCTTCCCAGGACATAACT  
ATATACCAGAATCATCCTGTGCCTCGAGCCAGGAGCCCAAACCGGCTGGCAACCGGAACTCAAAGGAGTTCA  
TGGAAGTTCGGTGAAGTGGAGACCAGGTGTTATTGATGAGCAGTCTGACGACTCGCTGGAGCTTGAGAGTGA  
GGCACGGAAGCCAGTTGTCCACCAAGACGACGACGACAAAGACTCCACGAGAAAGAAAGAGG**TAG**CAGAAGCCC  
GATCCGTCTTGGGATGGTATTCTGCTAGCTATACCGTGCTATTCCGGACTTTTGTTCCTTTTTCCTTTTTCGT  
TTATATTGATTGTGATCTTTCTTAATTTTTTCTTTAACTATACCCCCGGTTGAAAGGTGATAGGGGGCCAAC  
TAACCGAAAAGCAGCAGAAAAACCGGCTTGGTCGCTGCCTTGGAGACGACGGCGATTCTCGTGTTTAGGATTT  
CATTTTTGAGTGATATAACTATGGGTACAATAGCGTCCACTGGGCAATGTAATTACAGTCTCTTCTCACTCAC  
CACCGGACAATAATAACAATATTAATATTGACGGACCGTTGATAGCTTAACCTGCCATGACTAAGCCGGCCTC  
CCTGAAGCCGCGATGGCCTGATGATGCGCCACCGTCAGGTCTCGCTCGCTCAGGCAGCAGAGAATCCAGCGG  
AGGAGATGACGCCCTGCACGAACACCGTCCAGGGACCGTCTCCGCCCCGTCGCGAGCTCGAATTGTAATCATC  
TCGACGGCGTTGGCCTGCTCGCCGCAAGGGAGAAAAAGGGGGCAGAAGGGCAGCGGTAATTTTTGGTATTGGA  
GATGCAGCTGTAAACCAATAAAAAACGACGTAAAATACCAGGAACAATGCATTATCTTACAGTACCGTACGCC  
CCTTGCATAAAAATGCGAGTTCGATCTCAAGATGCAACTTTTTTTTTCCCTTGCTTCGTCCGCAGCAGCTTCAA

GGCATTTCATCACAAACAACGAACAAGTCTTGAGCGGAAGCAGGAGGATAAGACGATCACCA**ATGGGCCTCTTAG**  
CCGACATTGTCTCTCGTTTCTGCGAGAAGTGTCTCGACCTGTCCACCGCCGCGCT

[Read No.m64281e\_230311\_112734/100860170/ccs] [Sense (+) strand]

AAT~ACC (5'UTR)

ATG~TAG (*chkB* protein kinase genomic DNA) (Forward sequence)

ATG~TGA (*TinCYP51B* gene) (Forward sequence)

TAA~GCT (3'UTR)

CTA~CAT (*FYV4* genomic DNA) (Reverse sequence)

TAATTGGAGCAGCATCAGACATATCAACGCCGAAAGCAACGCCTCAAAACGTGGAAGTAGAGAGATAAACCG  
CGCTGGATATCTTATAGGCCGGCATGCAGAGTGCAGTATGCCTTTACCCATTGCATACTCTCTGCCGTCTAGT  
GATCAATTGCTAACCATCTGGGTAAGTGCAGATTTTCAAGATCAAGCTCCCCACGATATCCAACCGCCATTGCCT  
GATATTCACGAAAACAGGGGAGGAGACTTTGTTGCAATTGTGGAAGATCTCTCTATCAATGGCACTTTCATC  
AACGACGCCATCATCGGCAAGAACAACGCCGAGAGCTCGAAAACGGCGACGAGATTACCATCCTGCAAGAAT  
CCAGATTTCATCTTCAACTACCCGCGGAGTCGGAACACAAGCAAGTCCGACAGCAGTATAAGCTCTTTGATAT  
GCTGGGTAGGGACACTTTGCTCGGTTTATCTATGCGCTGAACGTTCTACGGGGATCAAGTATGCCGTCAAAC  
ATTTTCGAGAAAACGCCCGGGCGCAGTTCAGAGGCTAGACCGTGAAGCACTACAGCAAGAGATTTCAATGCTGAT  
GAGTGTCAACCATCCGAACATGCTGTGCCTAAAGGATACCTTTGACGAGAGCGATGGTGTCTTCTGATTCTT  
GAGCTTGCGCCAGAGGGCGAACTGTTCAACTGGATCATTAGGCATCAGAAACTCAGCGAGGAGGAGACTCGAA  
AAGTATTCATTCAGCTTTTTGAAGGTTTGAGATACCTGGTATGTCGTTTCGTTTTCTGGTTGATCAGACTCATG  
GCAGTGTATATGGCTAACCGTTGTCGTAGCATGAACGAAACATCATTACCGTGACATAAAGCCAGAGAACAT  
TCTGGTTGTGACAAAAGATCTTACCGTAAAATTAGCAGACTTCGGCCTTGCAAAGATTGTCGGCGAACACTCC  
TTTACCACCACGCTGTAAGTTCACCTACCTTCTGCCGTTCAAATCTGGGGTCAATCTTACTAAGAGATCATAA  
AATCTAGATGTGGAACGCCTGGCTGTAAGTTCCTGCTGCTCTGTTAACGCTGGTGTCTTTCATCCACCAAT  
GTGAATCTAACAATTCTTATCAGATGTTGCTCCTGAGATACTGGCAGAAAACGCTGAAGCCAGAATGTACACC  
CGAGCGGTTGACATCTGGTCACTCGGAGTGGTACTCTACATCTGCCTGTGCGGATTCCCTCCTTTCTCAGATG  
AACTGTACCACCCAAGAGACTACCCATACACTCAGAAAGAGCAGATCCAGCTCGGAATATTTAAGTATCCTCT  
TCCATACTGGGACTCAATCGATTATAGAGCCATGGACCTTATCGACTCCATGATCGAAGTCGACGTGAAGGAG  
CGTTTGAAAGTAGATGAGTGTCTCCAGCACCCATGGATCACTGGCATCGACCCCGATGAGCCTAGGGTGGCAG  
ACAGCACCGATGACCTAGCCGGGGCCATCGGTGGCCTGAGGGTGTCCAAAGAACGCCGGCCAACCTATGGTCCG  
CAGGCTGTTGAGTGACATACATGAAGTCACGGTCAAGCAGGTGGTGAAGACCAAGGAAGACGACCCTGCTTCC  
CAGGACATAAACTATATAACAGAATCATCCTGTGCCTCGAGCCCAGGAGCCCAAACCGGCTGGCAACCGGAAC  
TCAAAGGAGTTCATGGAACCTCGGTGGAAGTGGAGACCAGGTGTTATTCGATGAGCAGTCTGACGACTCGCTGG  
AGCTTGAGAGTGAGGCACGGAAGCCAGTTGTCCACCAAGACGACGCAGACAAGACTCCACGAGAAAGAAAGAG  
GTAGCAGAAGCCCGATCCGTCTTGGGATGGTATTCTGCTAGCTATACCGTGCTATTCCGGACTTTTGTTC  
ATTCTTTTTTCGTTTATATTGATTGTGATCTTTCTTAATTTTTTCTTTAACTATACCCCCGGTTGAAAGGTG



ATAGGGGGCCAACTAACCGAAAAGCAGCAGAAAAACCGGCTTGGTCGCTGCCTTGGAGACGACGGCGATTCTC  
GTGTTTAGGATTTTCATTTTTGAGTGATATAACTATGGGTACAATAGCGTCCACTGGGCAATGTAATTACAGTC  
TCTTCTCACTCACCACCGGACAATAATAACAATATTAATATTGACGGACCGTTGATAGCTTAACCTGCCATGA  
CTAAGCCGGCCTCCCTGAAGCCGCGATGGCCTGATGATGCGCCACCGTCAGGTCTCGCTCGCTCAGGCAGCA  
GAGAATCCAGCGGAGGAGATGACGCCCTGCACGAACACCGTCCAGGGACCGTCTCCGCCCCGTCGCGAGCTCG  
AATTGTAATCATCTCGACGGCCGTTGGCCTGCTCGCCGAAGGGAGAAAAAGGGGGGCAGAAGGGCAGCGGTA  
ATTTTGGTATTGGAGATGCAGCTGTAAACCAATAAAAAACGACGTAAAAATACCAGGAACAATGCATTATCTTA  
CAGTACCGTACGCCCTTGCATAAAATGCGAGTTCGATCTCAAGATGCAACTTTTTTTTTCCCTTGCTTCGTC  
CGCAGCAGCTTCAAGGCATTCATCACAAACAACGAACAAGTCTTGAGCGGAAGCAGGAGGATAAGACGATCAC  
C**ATG**GGCCTCTTAGCCGACATTGTCTCTCGTTTCTGCGAGAACTGCTCGACCCTGTCCACCGCCGCGCTCGTC  
GCAAGTGCCGTATCGGCTTTTATCGTCCTCTCCATTGTTATCAACGTCCTGCAGCAGCTCCTGTTCAAGACC  
CTACAAAGCCTCCGGTGGTCTTCCACTGGGTCCGGTCATTGGAAGCAGATCTCCTATGGAATTGACCCGTA  
CAAGTTCTTTGACGACTGCAAGGAGAAGGTTAGTTGGTGCAATTCAACTTAGCTATATAACCAGGTTGCGCAA  
GCTAACGTATAAATAATTTCCGTA CTACTAGTATGGAGACATCTTCACATTCATACTGCTGGGCAAGAAGACGA  
CTGTTTTTCTCGGTACAAAGGAAATGATTTTCATTTTTGAACGGCAAGCTCAAGGATGTTTGC GCGGAGGATGT  
CTACTCCCCCTCACCACCCAGTGTTCGGACGACATGTGGTGTATGATTGCCAAACTCCAAGCTCATGGAG  
CAGAAGAAGGTGTGTACAGCAATTTATTCCCGTCTACATCTCCTGGGCCTCCATTGCTAATTTAATCGTCTAC  
CAGTTCGTCAAGTTCGGCCTCACCTCTGAAGCTCTCCGATCCTATGTCACCCTGATCACCAAGGAAGTTGAGC  
AGTTCCTCGAGTCCCTCCCCGTCTTCAAGGGCGACTCCGGAGTTTTCAACGTCAGCAAGGTCATGGCTGAAAT  
CACCATCTACACCGCCTCTCGATCTCTACAGGGCAAGGAGGTGCGAGGAAAGTTCGATTCCAGCTTTGCGGAA  
CTCTACTCCGATCTCGACATGGGCTTCGCCGCCATCAACTTCATGTTCCCATGGTTCCCTTCCACACAACC  
GCAAGCGTGACCGTGCTCAAAAGAAGATGGCCAGGTTTACACCGACATCATCCGTCAGCGACGTGAGGCTGG  
TGGAGAGAAAGACTCCGAGGACATGGTATGGAACCTTGATGTCGTCCGTGTACAAGAATGGAACGCCAATTCCA  
GATATCGAAGTCGCCACATGATGATTGCTCTTCTTATGGCTGGCCAGCACTCTTCTTCTCCACCGGCTCCT  
GGATCGTTCTCCGCCTTGCCAGCCGTCCAGATATTCTCGAGGAACTCTACGAGGAACAGAAACGTGTTCTCGG  
CGAGGATCTTCCACCACTCACCTACGAATCTCTCCAGAACTTGATCTTCACAACAATGTAATCAAGGAGACT  
CTCCGCCTCCACGCTCCCATCCACTCTATCCTCCGTGCTGTTAAATCCCCATGCCCCGTTGAAGGAACTAACT  
ATGTTGTCCCAACCTCTCACAACCTCCTTGCCGCTCCTGGTGTTCCTCACGAGACCCTCAGTACTTCCCTGA  
CCCTCTTGTTTGAACCCTCACCGATGGGAGAACAACGTCGGTGTACCGTAGTCGAGGCCAGTGAAGAAAAG  
ACAGATTACGGATACGGTTTGGTTAGCAAGGGTGCCAACAGCCCTTACCTCCCATTCCGGCTCAGGCAGACACA  
GATGCATCGGTGAACAATTTGCATATGTTTCAGCTTGGAACCGTAACAGCTACGTTAGCCAGACTAATGAAATG  
GAAGCAAGTTGAAGGCACCAAAGATGTTGTGCCGCCAACTGACTATTCGGTAAGTTTGGCATATTACGCTCCT  
TTTTATTTTGGCTCGATTTTACTAACTTTGCATTAATAGTCCCTCTTCTCGAAGCCCCCTGGCGACCCAATGGT  
CTCGTGGGAGAAGCGAAAGCAGCCTTCCAGAA**TGA**TAATCACGACTGCGGATTGAATCATGTTAAATTTCT  
TGCTTCTTGCTAATTTATTTCTTCTTTTTCTTACGTTTATACACCGAGCCATATTTGCACTTTATGGTCAGC  
CAATAGGTTTTTCGGAATAGAGCATATGTAATAAAACTTTCTTTTGACCATGCTTTTGAAGATGGGGATGT  
AGATAATAGTATTATTCTAATACAGCCATTTATTACAATACTCTAGATGAACAGGAAAGTTGCAGTTACTCCG  
TTAGCTTTGGTGCAGAAACAAAATGGTAATATACATTGGAAATAGTACATCTTCCCGTAGCTGGGATAATCTA

GCATCTAAACAGCGATATCCAAGCCAGTAATGTCAGGAAGTAACCAGCCAGCAACGTCGTTAATCCCGTGCCC  
CCTTTCAACTCCGACGCTACAAAACGCCTAAGCAGCTGCCTGAGCATTCCCTCTCTCCGCCAACGCTCTCTTC  
GCTCTGATCTCCTTCTGTCTTCTCTGACCACCGTCAATCTTTCTGCCACGCTTATGCTCCACATGCCATCAG  
TAACCTGAACCTTGACGGCGGTACTCCATGTGTTTGAATAATCTGAGCATAACGGCCCTTGATCATATTCCC  
GTGGTGCAATTTATAATGGGCAAACCTTTTTGAGTGGCTTGGAAGTATCCTTGAGCTCTGTTTTCGCCTGGTGGT  
AGATTGACAATCGCATAACGCATTCCAGGTGTAAGGGTAGCGGTGCCCATTTGTGCTAACATCTAGGGACTCTC  
CGTCGGTGGCATTGGTAGTTTTTGCACCTCTTTGACTTTTTGACGGGGACCTCAACAGCTCTCAGCTCAGCAAC  
ACCGTCAACAACGTTTTTCGAAATCACCTCCTGGGCCGTAGTCCCTGCTGTCTGAATTTCTCTCTCCACCGCAGT  
ATGTATCGTCTGTCCCTTGTCAATTTCTATGCCAATTCTCGAAGCTCAGCCGAGTCCGCTGTAAACAATTGCT  
TCCATCCGGTGATTTTGTGCTGGAATATCTGGACATGTTTCGCCAATTAGGCGTAGGAATGTTTCGACATCGGG  
CACGAATGGGGTAGGTGATGGCACTGTTGCGGGTTTTTCGAGATTGATGAAGGTACCGTACGCATGGCTGATAA  
TGGGGTTTTGTGACGGAAGTGAAGAGCCGTAGTGAAGGGATGTTCTGGCATTAAAGCCCGGTATGCGCGCCG  
CAGCCATAGTGGTTATATCGCCTTATATCAAACCGTTCAATGTCGAGATCTGGGGGTGAAGATTTTAATTTAG  
CTCGTGGTGTAAAGAACCATCGGCGGGCGTGACGAAAGCGAAAAAGCCACGGCACCAAGGGCCCAGGTAAA  
CCGGTAAGGGACTCAAGGCGAGTCAATCCAATGCTCAATGGCGCTGTATAGAAGATGTTCAACTGGTTCTTCG  
ACTTCGTTCAAGATTTTGCACCAAATTTTGAATTAGGTCCGACGGCCTTAGCTCGGATCAACAAAACGCCGA  
TCTCCGGTGAGCTCGGGCCAGCCGAAGCTTCCATCGCAACATTCAAAGATGAAAGACGACGATATATATTTTG  
ATAACAAACAAAGCTGTATTGTTGATTGAATACTAGGAGAGCTGCTCAGAGCAGTGTCTCACTCTTGTGCCAC  
TCTATCCTTTGTCTCGCGAAATTTGGTGAAGCCAATTTTCGCTTGACATTATGGCAGTGTGCGCCGCTTCCCTCT  
CAATTCCTCCCATCACTACTACCGGTGCTCCAAAGTCGTTAGCGATGAGAAATATTGCTTCTCAAGAGCCTC  
GGACGGCGCCTAGTGGTGATCCTGCAGTTCCTAAGCCCTCCATGCCCGAACCAGAGCTGGCGGAGCAGTTAAA  
CGCTGATGTACGGCGGAAATATGTCAAAGGTGGGCGGGCAAATACACCCCAACCATTGGGACCCCATATGCT  
AACATTTGGTTATTCTGAAAGATAAGAAGCTCGGTGAAGGTACATATGCAGTTGTTTACCTAGGCCATCTACG  
AGATGATCCCACTTCGCTAATAAAGAGCGACTTCGCATCTTTCGACAGAAAAAAGGTCGAGCAAGGGAAGT  
TCGCTCAGCCTGGCCTGCCATTGACTCTAAGCGCCGTCGTTCTCTTGCTTGGGGGCTTGCTGCAGCTTGGCCT  
GGGCTTGTCCGGCCTGGAACCTCAGGGAGCCGAAAGATAACTAGTTATTTATTTTCGTCTCCGCACACCTCGGCG  
GCTGTCTCATAGTCGGGATATACATAGTACGGGGTAGCAGGTAGACTCACACGCTGCCTCTCTCTGCTGAACT  
GCTTCTACCACCTTCGACAGCGACACTGTTTCGGTCTTGCAACTACGGTAGAGTGTGTTGGGGCTTGATCTTGC  
CTGCCATCGACTTGGAGTTGAAGTTGCGAAGCCATTGGCAGTCCATCCGGGATATTGTAAGTGCCTCAACT  
TCTTCACGCCGGGCCAAAACATGCCTCCGCAGAGGGAGAGAAGCAATCTGAAGAGAGAAAGGGTAAGATATGA  
ACACGTTATATCCAATTAGTTTCTCAGAAGGATGAAAATATTCAGCTGCTAACTTCTTTTCCCAAACCTGCA  
GGGCAACGCAGCTCCAGACCATGAATCAAAGAAGCCACGGAGATCTCCTCGAATCTCATCTCAATTGCAGCAG  
GATGCCGATATCTACCTTCTCCCCTAGCTAATGAAGTAATCTCAGAAGAAAAGCGTGAAGTTGCTACAGTTT  
CTCCCCAGAAGGCCGCCGAAACCAGGCGCCTCGAGGTCAATCGCCAGACGAGTCGTCAATGTCCCACCCAGGG  
TTTCTCTCAGTATCCCCAATCCAATCCATTGACGATGTGGAAGACGAGGTGGCCAGGGCATATGGGGATAT  
CTTACTCCGCTAGATAACAATTTTGGAGGCCAATTGGTTCTGAAGAAGCGGGACAGCACAAATACTACACCGG  
TAATTGAGCAGCATCAGACATATCAACGCCGAAAGCAACGCCTCAAAACGTGGAACCTAGAGAGATAAACC  
CGCTGGATATCTTATAGGCCGGCATGCAGAGTGCAGTATGCCTTTACCCATTGCATACTCTCTGCCGTCTAGT

GATCAATTGCTAACCATCTGGGTACTGCAGATTTAGGATCAAGCTCCCCACGATATCCAACCGCCATTGCCT  
GATATTCACGAAAACAGGGGAGGAGACTTTGTTGCAATTGTGGAAGATCTCTCTATCAATGGCACTTTCATC  
AACGACGCCATCATCGGCAAGAACAACGCCGAGAGCTCGAAAACGGCGACGAGATTACCATCCTGCAAGAAT  
CCAGATTCATCTTCAACTACCCGCGGAGTCGGAACACAAGCAAGTTCCGACAGCAGTATAAGCTCTTTGATAT  
GCTGGGTAGGGACTTTGCTCGGTTTATCTATGCGCTGAACGTTCTACGGGGATCAAGTATGCCGTCAAAC  
ATTTGAGAAAACGCCGGGCGCAGTTCAGAGGCTAGACCGTGAAGCACTACAGCAAGAGATTTCAATGCTGAT  
GAGTGTCAACCATCCGAACATGCTGTGCCTAAAGGATACCTTTGACGAGAGCGATGGTGTCTTCTGATTCTT  
GAGCTTGCGCCAGAGGGCGAACTGTTCAACTGGATCATTAGGCATCAGAAACTCAGCGAGGAGGAGACTCGAA  
AAGTATTCATTCAGCTTTTTGAAGTTTTGAGATACCTGGTATGTCGTTTCGTTTTCTGGTTGATCAGACTCATG  
GCAGTGTATATGGCTAACCGTTGTCGTAGCATGAACGAAACATCATTACCGTGACATAAAGCCAGAGAACAT  
TCTGGTTGTGACAAAGATCTTACCGTAAAATTAGCAGACTTCGGCCTTGCAAAGATTGTCGGCGAACACTCC  
TTTACCACCACGCTGTAAGTTCACCTACCTTCTGCCGTTCAAATCTGGGGTCAATCTTACTAAGAGATCATAA  
AATCTAGATGTGGAACGCCTGGCTGTAAGTTTCCCTGCTGCTCTGTAAACGCTGGTGCTTTCATCCACCAAAT  
GTGAATCTAACAATTCTTATCAGATGTTGCTCCTGAGATACTGGCAGAAAACGCTGAAGCCAGAATGTACACC  
CGAGCGGTTGACATCTGGTCACTCGGAGTGGTACTCTACATCTGCCTGTGCGGATTCCCTCCTTTCTCAGATG  
AACTGTACCACCCAAGAGACTACCCATACACTCAGAAAAGAGCAGATCCAGCTCGGAATATTTAAGTATCCTCT  
TCCATACTGGGACTCAATCGATTATAGAGCCATGGACCTTATCGACTCCATGATCGAAGTCGACGTGAAGGAG  
CGTTTGAAAGTAGATGAGTGTCTCCAGCACCCATGGATCACTGGCATCGACCCCGATGAGCCTAGGGTGGCAG  
ACAGCACCGATGACCTAGCCGGGGCCATCGGTGGCCTGAGGGTGTCCAAAGAACGCCGGCCAACCTATGGTCCG  
CAGGCTGTTGAGTGACATACATGAAGTCACGGTCAAGCAGGTGGTGAAGACCAAGGAAGACGACCCTGCTTCC  
CAGGACATAACTATATACCAGAATCATCCTGTGCCTCGAGCCAGGAGCCCAAACCGGCTGGCAACCGGAACT  
CAAAGGAGTTCATGGAACCTCGGTGGAAGTGGAGACCAGGTGTTATTCGATGAGCAGTCTGACGACTCGCTGGA  
GCTTGAGAGTGAGGCACGGAAGCCAGTTGTCCACCAAGACGACGCAGACAAGACTCCACGAGAAAGAAAGAGG  
**TAG**CAGAAGCCCGATCCGTCTTGGGATGGTATTCTGCTAGCTATACCGTGCTATTCCGGACTTTTGTTCCAA  
TTCTTTTTTCGTTTATATTGATTGTGATCTTTCTTAATTTTTTCTTTAACTATACCCCCGGTTGAAAGGTGA  
TAGGGGGCCAACCTAACCGAAAAGCAGCAGAAAACCGGCTTGGTCGCTGCCTTGGAGACGACGGCGATTCTCG  
TGTTTAGGATTTCAATTTTTGAGTGATATAACTATGGGTACAATAGCGTCCACTGGGCAATGTAATTACAGTCT  
CTTCTCACTCACCACCGGACAATAATAACAATATTAATATTGACGGACCGTTGATAGCTTAACTGCCATGAC  
TAAGCCGGCCTCCCTGAAGCCGCGATGGCCTGATGATGCGCCACCGTCAGGTCTCGCTCGCTCAGGCAGCAG  
AGAATCCAGCGGAGGAGATGACGCCCTGCACGAACACCGTCCAGGGACCGTCTCCGCCCCGTCGCGAGCTCGA  
ATTTGTAATCATCTCGACGGCCGTTGGCCTGCTCGCCGCAAGGGAGAAAAAGGGGGCAGAAGGGCAGCGGTAA  
TTTTGGTATTGGAGATGCAGCTGTAAACCAATAAAAAACGACGTAAAAATACCAGGAACAATGCATTATCTTAC  
AGTACCGTACGCCCTTGCATAAAATGCGAGTTCGATCTCAAGATGCAACTTTTTTTTTTCCCTTGCTTCGTCC  
GCAGCAGCTTCAAGGCATTCATCACAACAACGAACAAGTCTTGAGCGGAAGCAGGAGGATAAGACGATCACC  
**ATG**GGCCTCTTAGCCGACATTGTCTCTCGTTTCTGCGAGAAGTCTCGACCCTGTCCACCGCCGCGCTCGTCG  
CAAGTGCCGTATCGGCTTTTATCGTCCTCTCCATTGTTATCAACGTCTGCAGCAGCTCCTGTTCAAGGACCC  
TACAAAGCCTCCGGTGGTCTTCCACTGGGTTCGGTTCATTGGAAGCACGATCTCCTATGGAATTGACCCGTAC  
AAGTTCTTTGACGACTGCAAGGAGAAGGTTAGTTGGTGAATTCAACTTAGCTATATACCAGGTTGCGCAAAG

CTAACGTATAAATAATTTTCGGTACTCTAGTATGGAGACATCTTCACATTCATACTGCTGGGCAAGAAGACGAC  
TGTTTTTCTCGGTACAAAGGGAAATGATTTTCATTTTGAACGGCAAGCTCAAGGATGTTTGC GCGGAGGATGTC  
TACTCCCCCTCACCACCCAGTGTTTCGGACGACATGTGGTGTATGATTGCCCAAACCTCCAAGCTCATGGAGC  
AGAAGAAGGTGTGTACAGCAATTTATTCCCGTCTACATCTCCTGGGCTCATTGCTAATTTAATCGTCTACC  
AGTTCGTCAAGTTCGGCCTCACCTCTGAAGCTCTCCGATCCTATGTCACCCTGATCACCAAGGAAGTTGAGCA  
GTTCTTCGAGTCTCCCCCGTCTTCAAGGGCGACTCCGGAGTTTTCAACGTCAGCAAGGTCATGGCTGAAATC  
ACCATCTACACCGCCTCTCGATCTCTACAGGGCAAGGAGGTGCGAGGAAAGTTCGATTCCAGCTTTGCGGAAC  
TCTACTCCGATCTCGACATGGGCTTCGCCGCCATCAACTTCATGTTCCCATGGTTCCCTTCCCACACAACCG  
CAAGCGTGACCGTGCTCAAAAGAAGATGGCCCAGGTTTACACCGACATCATCCGTCAGCGACGTGAGGCTGGT  
GGAGAGAAAGACTCCGAGGACATGGTATGGAACCTTGATGTCGTCGTCGTTACAAGAATGGAACGCCAATTCAG  
ATATCGAAGTCGCCACATGATGATTGCTCTTCTTATGGCTGGCCAGCACTCTTCTTCTCCACCGGCTCCTG  
GATCGTTCTCCGCCTTGCCAGCCGTCCAGATATTCTCGAGGAACTCTACGAGGAACAGAAACGTGTTCTCGGC  
GAGGATCTTCCACCACTCACCTACGAATCTCTCCAGAACTTGATCTTCAACAATGTAATCAAGGAGACTC  
TCCGCCTCCACGCTCCCATCCACTCTATCCTCCGTGCTGTTAAATCCCCTATGCCCGTTGAAGGAACTAACTA  
TGTTGTCCCAACCTCTCACAACCTCCTTGCCGCTCCTGGTGTCCCTCACGAGACCTCAGTACTTCCCTGAC  
CCTCTTGTTTTGGAACCCTCACCGATGGGAGAACAACGTCGGTGTACCCTAGTCGAGGCCAGTGAAGAAAAGA  
CAGATTACGGATACGGTTTTGGTTAGCAAGGGTGCCAACAGCCCTTACCTCCCATTCGGCTCAGGCAGACACAG  
ATGCATCGGTGAACAATTTGCATATGTTGAGCTTGGAACCGTAACAGCTACGTTAGCCAGACTAATGAAATGG  
AAGCAAGTTGAAGGCACCAAAGATGTTGTGCCGCAACTGACTATTCGGTAAGTTTGGCATATTACGCTCCTT  
TTTATTTTGCTCGATTTTACTAATTTGCATTAATAGTCCCTCTTCTCGAAGCCCCTTGCCGACCCAATGGTC  
TCGTGGGAGAAGCGAAAGCAGCCTTCCCAGAAATGAT AATCACGACTGCGGATTGAATCATGTTAAATTTCTT  
GCTTCTTGCTAATTTATTTCTTCTTTTTCTTACGTTTATACACCGAGCCATATTTGCACTTTATGGTCACGC  
AAATAGGTTTTTCGGAATAGAGCATATGTAATAAAAACCTTTCTTTTGACCATGCTTTTTGAAGATGGGGGATGTA  
GATAATAGTATTATTCTAATACAGCCATTTATTACAATACTCTAGATGAACAGGAAAGTTGCAGTTACTCCGT  
TAGCTTTGGTGCAGAAACAAAATGGTAATATACATTGGAAATAGTACATCTTCCCCTAGCTGGGATAATCTAG  
CATCTAAACAGCGATATCCAAGCCAGTAATGTCAGGAAGTAACCAGCCAGCAACGTCGTTAATCCCCTGCCCC  
CTTTCAACTCCGACGCTACAAAACGCCTAAGCAGCTGCCTGAGCATTCTCCTCTCCGCCAACGCTCTCTTCG  
CTCTGATCTCCTTCTGTCTTCTCTGACCACCGTCAATCTTTCTGCCACGCTTATGCTCCCACATGCCATCAGT  
AACCTGAACCTTGACGGCGGTACTCCATGTGTTTGGAAATAATCTGAGCATAACGGCCCCTTGATCATATTCCTG  
TGGTGAATTTATAATGGGCAAACCTTTTTGAGTGGCTTGGAAAGTATCCTTGAGCTCTGTTTCGCCTGGTGGTA  
GATTGACAATCGCATAACGCATTCAGGTGTAAGGGTAGCGGTGCCCATTTGTGCTAACATCTAGGGACTCTCC  
GTCGGTGGCATTGGTAGTTTTTGCACCTTTTACTTTTTGACGGGGACCTCAACAGCTCTCAGCTCAGCAACA  
CCGTCAACAACGTTTTTCGAAATCACCTCCTGGGCCGTAGTCTGCTGTCTGAATTTCTCTCTCCACCGCAGTA  
TGTATCGTCTGTCCCTTGTCAATTTCTATGCCCAATTCTCGAAGCTCAGCCGAGTCCGCTGTAAACAATGCTT  
CCATCCGGTGATTTTGCTGGAATATCTGGACATGTTTTCGCCCAATTAGGCGTAGGAATGTTTTGACATCGGGC  
ACGAATGGGGTAGGTGATGGCACTGTTGCGGGTTTTTCGAGATTGATGAAGGTACCGTACGCATGGCTGATAAT  
GGGGTTTTGTGACGGAAGTGAAGAGCCGTAGTGGAAAGGGATGTTCTGGCATTAAAGCCCCTGATGCGCGCCGC  
AGCCATAGTGGTTATATCGCCTTATATCAAACCGTTCAATGTCGAGATCTGGGGGGTGAAGATTTTAATTTAG

CTCGTGGTGTAAGAACACCATCGGCGGGCGTGACGAAAGCGAAAAAGCCACGGCACCAAGGGCCCAGGTAAA  
CCGGTAAGGGACTCAAGGCGAGTCAATCCAATGCTCAATGGCGCTGTATAGAAGATGTTCAACTGGTTCTTCG  
ACTTCGTTCAAGATTTTGCACCAAATTTTGAATTAGGTCCGACGGCCTTAGCTCGGATCAACAAAACGCCGA  
TCTCCGGTGAGCTCGGGCCAGCCGAAGCTTCCATCGCAACATTCAAAGATGAAAGACGACGATATATATTTTG  
ATAACAAAACAAAGCTGTATTGTTGATTGAATACTAGGAGAGCTGCTCAGAGCAGTGTCTCACTCTTGTGCCAC  
TCTATCCTTTGTCTCGCGAAAATTGGTGGAAAGCCAATTTTCGCTTGACATTATGGCAGTGTGCGCCGCTTCCCTCT  
CAATTCCCTCCCATCACTACTACCGGTGCTCCAAAGTCGTTAGCGATGAGAAATATTGCTTCTCAAGAGCCTC  
GGACGGCGCCTAGTGGTGATCCTGCAGTTCCTAAGCCCTCCATGCCCCAACCAGAGCTGGCGGAGCAGTTAAA  
CGCTGATGTACGGCGAAATATGTCAAAGGTGGGCGGGCAAATACACCCCAACCATTGGGACCCCATATGCT  
AACATTTGGTTATTCTGAAAGATAAGAAGCTCGGTGAAGGTACATATGCAGTTGTTTACCTAGGCCATCTACG  
AGATGATCCCACTTCGCTAATAAAGAGCGACTTCGCATCTTTCGACAGAAAAAAGGTCGAGCAAGGGAAGT  
TCGCTCAGCCTGGCCTGCCATTGACTCTAAGCGCCGTCGTTCTCTTGCTTGGGGGCTTGCTGCAGCTTGGCCT  
GGGCTTGTCCGGCCTGGAACCTCAGGGAGCCGAAAGATAACTAGTTATTTATTTTCGCTCCGCACACCTCGGCG  
GCTGTCTCATAGTCGGGATATACATAGTACGGGGTAGCAGGTAGACTCACACGCTGCCTCTCTGCTGAACT  
GCTTCTACCACCTTCGACAGCGACACTGTTTCGGTCTTGCAACTACGGTAGAGTGTGTTGGGGCTTGATCTTGC  
CTGCCATCGACTTGGAGTTGAAGTTGCGAAGCCATTGGCAGTCCATCCGGGATATTTCGTAACCTGCCGTCAACT  
TCTTCACGCCGGGCCAAAAC**ATGCCTCCGCAGAGGGAGAGAAGCAATCTGAAGAGAGAAAGGGTAAGATATGA**  
**ACACGTTATATCCAATTAGTTTCTCAGAAGGATGAAAATATTCAAGCTGCTAACTTCTTTTCCCAAACCTGCA**  
**GGGCAACGCAGCTCCAGACCATGAATCAAAGAAGCCACGGAGATCTCCTCGAATCTCATCTCAATTGCAGCAG**  
**GATGCCGGATATCTACCTTCTCCCCTAGCTAATGAAGTAATCTCAGAAGAAAAGCGTGAAGTTGCTACAGTTT**  
**CTCCCCAGAAGGCCGCCGAAACCAGGCGCCTCGAGGTCAATCGCCAGACGAGTTCGTCATGTCCCACCCAGGG**  
**TTTCTCTCAGTATCCCCAATCCAATCCATTGACGATGTGGAAGACGAGGTGGCCAGGGCATATGGGGATAT**  
**CTTACTCCGCTAGATAACAATTTTGGAGGCCAATTGGTTCTGAAGAAGCGGGACAGCACAAATACTACCCGG**  
**TAAATTGGAGCAGCATCAGACATATCAACGCCGAAAGCAACGCCTCAAAACGTGGAACCTAGAGAGATAAACCG**  
**CGCTGGATATCTTATAGGCCGGCATGCAGAGTGCGGTATGCCTTTACCCATTGCATACTCTCTGCCGTCTAGT**  
**GATCAATTGCTAACCATCTGGGTACTGCAGATTTCAAGGATCAAGCTCCCCACGATATCCAACCGCCATTGCCT**  
**GATATTCACGAAAACAGGGAGGAGACTTTGTTGCAATTGTGGAAGATCTCTCTATCAATGGCACTTTCATCA**  
**ACGACGCCATCATCGGCAAGAACAACGCCGAGAGCTCGAAAACGGCGACGAGATTACCATCCTGCAAGAATC**  
**CAGATTCATCTTCAACTACCCGCGGAGTCGGAACACAAGCAAGTTCCGACAGCAGTATAAGCTCTTTGATATG**  
**CTGGGTAGGGGACACTTTGCCTCGGTTTATCTATGCGCTGAACGTTCTACGGGGATCAAGTATGCCGTCAAAC**  
**ATTTGAGAAAACGCCCGGGCGCAGTTCAGAGGCTAGACCGTGAAGCACTACAGCAAGAGATTTCAATGCTGAT**  
**GAGTGTCAACCATCCGAACATGCTGTGCCTAAAGGATACCTTTGACGAGAGCGATGGTGTCTTCCCTGATTCTT**  
**GAGCTTGCGCCAGAGGGCGAACTGTTCAACTGGATCATTAGGCATCAGAAACTCAGCGAGGAGGAGACTCGAA**  
**AAGTATTCATTCAGCTTTTTGAAGGTTTGAAGTACCTGGTATGTCGTTTCGTTTTCTGGTTGATCAGACTCATG**  
**GCAGTGTATATGGCTAACCGTTGTCGTAGCATGAACGAAACATCATTACCGTGACATAAAGCCAGAGAACAT**  
**TCTGGTTGTGACAAAAGATCTTACCGTAAAAATTAGCAGACTTCGGCCTTGCAAAGATTGTCGGCGAACACTCC**  
**TTTACCACCACGCTGTAAGTTCACCTACCTTCTGCCGTTCAAATCTGGGGTCAATCTTACTAAGAGATCATAA**  
**AATCTAGATGTGGAACGCCTGGCTGTAAGTTCCCTGCTGCTCTGTTAACGCTGGTGCTTTCATCCACCAAT**

GTGAATCTAACAAATTCTTATCAGATGTTGCTCCTGAGATACTGGCAGAAAACGCTGAAGCCAGAATGTACACC  
CGAGCGGTTGACATCTGGTCACTCGGAGTGGTACTCTACATCTGCCTGTGCGGATTCCCTCCTTTCTCAGATG  
AACTGTACCACCCAAGAGACTACCCATACACTCAGAAAAGAGCAGATCCAGCTCGGAATATTTAAGTATCCTCT  
TCCATACTGGGACTCAATCGATTATAGAGCCATGGACCTTATCGACTCCATGATCGAAGTCGACGTGAAGGAG  
CGTTTGAAAGTAGATGAGTGTCTCCAGCACCCATGGATCACTGGCATCGACCCCGATGAGCCTAGGGTGGCAG  
ACAGCACCGATGACCTAGCCGGGGCCATCGGTGGCCTGAGGGTGTCCAAAGAACGCCGGCCAACCTATGGTCCG  
CAGGCTGTTGAGTGACATACATGAAGTCACGGTCAAGCAGTGGTGAAGACCAAGGAAGACGACCTGCTTCC  
CAGGACATAACTATATACCAGAATCATCCTGTGCCTCGAGCCAGGAGCCCAAACCGGCTGGCAACCGGAAC  
CAAAGGAGTTCATGGAACCTCGGTGGAAGTGAGACCAGGTGTTATTTCGATGAGCAGTCTGACGACTCGCTGGA  
GCTTGAGAGTGAGGCACGGAAGCCAGTTGTCCACCAAGACGACGCAGACAAGACTCCACGAGAAAAGAAAGAGG  
**TAG**CAGAAGCCCGATCCGTCTTGGGATGGTATTCTGCTAGCTATAACCGTGTATTCCGGACTTTTGTTCCAA  
TTCCTTTTTTCGTTTATATTGATTGTGATCTTTCTTAATTTTTTCTTTAACTATAACCCCGGTTGAAAGGTGA  
TAGGGGGCCAACCTAACCGAAAAGCAGCAGAAAAACCGGCTTGGTCGCTGCCTTGGAGACGACGGCGATTCTCG  
TGTTTAGGATTTCATTTTTGAGTGATATAACTATGGGTACAATAGCGTCCACTGGGCAATGTAATTACAGTCT  
CTTCTCACTCACCACCGGACAATAATAACAATATTAATATTGACGGACCGTTGATAGCTTAACCTGCCATGAC  
TAAGCCGGCCTCCCTGAAGCCGCGATGGCCTGATGATGCGCCACCGTCAGGTCTCGCTCGCTCAGGCAGCAG  
AGAATCCAGCGGAGGAGATGACGCCCTGCACGAACACCGTCCAGGGACCGTCTCCGCCCGTCGCGAGCTCGA  
ATTGTAATCATCTCGACGGCCGTTGGCCTGCTCGCCGCAAGGGAGAAAAAGGGGGCAGAAGGGCAGCGGTAA  
TTTTGGTATTGGAGATGCAGCTGTAAACCAATAAAAAACGACGTAAAAATACCAGGAACAATGCATTATCTTAC  
AGTACCGTACGCCCTTGCATAAAATGCGAGTTCGATCTCAAGATGCAACTTTTTTTTTCCCTTGCTTCGTCC  
GCAGCAGCTTCAAGGCATTCATCACAACAACGAACAAGTCTTGAGCGGAAGCAGGAGGATAAGACGATCACC  
**ATG**GGCCTCTTAGCCGACATTGTCTCTCGTTTTCTGCGAGAAGTGTCTCGACCCTGTCCACCGCCGCGCTCGTCG  
CAAGTGCCGTATCGGCTTTTATCGTCCTCTCCATTGTTATCAACGTCTGCAGCAGCTCCTGTTCAAGGACCC  
TACAAAGCCTCCGGTGGTCTTCCACTGGGTTCGGTCATTGGAAGCACGATCTCCTATGGAATTGACCCGTAC  
AAGTCTTTGACGACTGCAAGGAGAAGGTTAGTTGGTGAATCAACTTAGCTATATACCAGGTTGCGCAAAG  
CTAACGTATAAAATAATTTCCGTACTCTAGTATGGAGACATCTTACATTCATACTGCTGGGCAAGAAGACGAC  
TGTTTTTCTCGGTACAAAGGGAAATGATTTCATTTTGAACGGCAAGCTCAAGGATGTTTGC GCGGAGGATGTC  
TACTCCCCCTCACCACCCAGTGTTCCGGACGACATGTGGTGTATGATTGCCCAAACCTCAAGCTCATGGAGC  
AGAAGAAGGTGTGTACAGCAATTTATTCCCGTCTACATCTCCTGGGCTCCATTGCTAATTTAATCGTCTACC  
AGTTCGTCAAGTTCGGCCTCACCTCTGAAGCTCTCCGATCCTATGTCACCCTGATCACCAGGAAGTTGAGCA  
GTTCTTCGAGTCTCCCCCGTCTTCAAGGGCGACTCCGGAGTTTTCAACGTGAGCAAGGTCATGGCTGAAATC  
ACCATCTACACCGCCTCTCGATCTCTACAGGGCAAGGAGGTGCGAGGAAAGTTCGATTCCAGCTTTGCGGAAC  
TCTACTCCGATCTCGACATGGGCTTCGCCGCCATCAACTTCATGTTCCCATGGTTCCCTTCCCACACAACCG  
CAAGCGTGACCGTGCTCAAAAAGAAGATGGCCCAGGTTTACACCGACATCATCCGTGACGACGTGAGGCTGGT  
GGAGAGAAAGACTCCGAGGACATGGTATGGAACCTTGATGTCGTCCGTGTACAAGAATGGAACGCCAATTCAG  
ATATCGAAGTCGCCACATGATGATTGCTCTTCTTATGGCTGGCCAGCACTCTTCTTCTCCACCGGCTCCTG  
GATCGTTCTCCGCCTTGCCAGCCGTCCAGATATTCTCGAGGAACTCTACGAGGAACAGAAACGTGTTCTCGGC  
GAGGATCTTCCACCACTCACCTACGAATCTCTCCAGAACTTGATCTTCAACAATGTAATCAAGGAGACTC

TCCGCCTCCACGCTCCCATCCACTCTATCCTCCGTGCTGTTAAATCCCCTATGCCCGTTGAAGGAACTAACTA  
TGTTGTCCCAACCTCTCACAACTCCTTGCCGCTCCTGGTGTTCCTCACGAGACCTCAGTACTTCCCTGAC  
CCTCTTGTTTGAACCTCACCGATGGGAGAACAACGTCGGTGTACCCTAGTCGAGGCCAGTGAAGAAAAGA  
CAGATTACGGATACGGTTTGGTTAGCAAGGGTGCCAACAGCCCTTACCTCCCATTTCGGCTCAGGCAGACACAG  
ATGCATCGGTGAACAATTTGCATATGTTTACGCTTGGAAACCGTAACAGCTACGTTAGCCAGACTAATGAAATGG  
AAGCAAGTTGAAGGCACCAAAGATGTTGTGCCGCCAACTGACTATTCGGTAAGTTTGGCATATTACGCTCCTT  
TTTATTTTGTCTCGATTTTACTAACTTTGCATTAATAGTCCCTCTTCTCGAAGCCCCTTGGCGACCCAATGGTC  
TCGTGGGAGAAGCGAAAGCAGCCTTCCCAGAAATGA**TAATCACGACTGCGGATTGAATCATGTTAAATTTCTT**  
**GCTTCTTGCTAATTTATTTCTTCTTTTCTTACGTTTATACACCGAGCCATATTTGCACTTTATGGTCACGC**  
**AAATAGGTTTTTCGGAATAGAGCATATGTAATAAAAACCTTTCTTTTGACCATGCTTTTGAAGATGGGGGATGTA**  
**GATAATAGTATTATTCTAATACAGCCATTTATTACAATACTCTAGATGAACAGGAAGTTGCAGTTACTCCGTT**  
**AGCTTTGGTGCAGAAACAAAATGGTAATATACATTGGAAATAGTACATCTTCCCGTAGCTGGGATAATCTAGC**  
**ATCTAAACAGCGATATCCAAGCCAGTAATGTCAGGAAGTAACCAGCCAGCAACGTCGTTAATCCCGTGCCCC**  
**TTTCAACTCCGACGCTACAAAACGCCTAAGCAGCTGCCTGAGCATTCTCCTCTCCGCCAACGCTCTCTTCGC**  
**TCTGATCTCCTTCTGTCTTCTCTGACCACCGTCAATCTTTCTGCCACGCTTATGCTCCACATGCCATCAGTA**  
**ACCTGAACCTTGACGGCGGTACTCCATGTGTTTGAATAATCTGAGCATACGGCCCCCTTGATCATATTCCCGT**  
**GGTGCAATTTATAATGGGCAAACCTTTTGGAGTGGCTTGAAGTATCCTTGAGCTCTGTTTCGCCTGGTGGTAG**  
**ATTGACAATCGCATAACGCATTCAGGTGTAAGGGTAGCGGTGCCATTGTGCTAACATCTAGGGACTCTCCGT**  
**CGGTGGCATTGGTAGTTTTTGCACCTTTTACTTTTTGACGGGGACCTCAACAGCTCTCAGCTCAGCAACACC**  
**GTCAACAACGTTTTCGAAATCACCTCCTGGGCCGTAGTCTGTCTGAATTTCTCTCTCCACCGCAGTATG**  
**TATCGTCTGTCCCTTGTCAATTTCTATGCCCAATTCTCGAAGCTCAGCCGAGTCCGCTGTAAACAATTGCTTCC**  
**ATCCGGTGATTTTGTGGAATATCTGGACATGTTTCGCCCAATTAGGCGTAGGAATGTTTCGACATCGGGCAC**  
**GAATGGGGTAGGTGATGGCACTGTTGCGGGTTTTTCGAGATTGATGAAGGTACCGTACGCATGGCTGATAATGG**  
**GGTTTGTGACGGAAGTGAAGAGCCGTAGTGAAGGGATGTTCTGGCATTAAGCCCCGGTATGCGCGCCGCAGC**  
**CATAGTGGTTATATCGCCTTATATCAAACCGTTCAATGTCGAGATCTGGGGGTGAAGATTTAATTTAGCTC**  
**GTGGTGTAAAGAACCCATCGGCGGGCGTGACGAAAGCGAAAAAGCCACGGCACCAAGGGCCAGGTAAACCG**  
**GTAAGGGACTCAAGGCGAGTCAATCCAATGCTCAATGGCGCTGTATAGAAGATGTTCAACTGGTTCTTCGACT**  
**TCGTTCAAGATTTTGCACCAAATTTTGAATTAGGTCCGACGGCCTTAGCTCGGATCAACAAAACGCCGATCT**  
**CCGGTGAAGCTCGGGCCAGCCGAAGCTTCCATCGCAACATTCAAAGAT**

[Read No.m64281e\_230311\_112734/178194669/ccs] [Antisense (-) strand]

GGT~ATT (5'UTR)

CTA~CAT (*chkB* protein kinase genomic DNA) (Reverse sequence)

TCA~CAT (*TinCYP51B* gene) (Reverse sequence)

AGC~TTA (3'UTR)

ATG~TAG (*FYV4* genomic DNA) (Forward sequence)

ACCTGCTACCCCGTACTATGTATATCCCGACTATGAGACAGCCGCCGAGGTGTGCGGAGACGAAATAAATAAC  
TAGTTATCTTTTCGGCTCCCTGAGTTCAGGCCGGACAAGCCCAGGCCAAGCTGCAGCAAGCCCCAAGCAAGA  
GAACGACGGCGCTTAGAGTCAATGGCAGGCCAGGCTGAGCGAACTTCCCTTGCTCGACCTTTTTTTTTCTGTCTG  
AAAGATGCGAAGTCGCTCTTTATTAGCGAAGTGGGATCATCTCGTAGATGGCCTAGGTAAACAACACTGCATATG  
TACCTTCACCGAGCTTCTTATCTTTTTCAGAAATAACCAAATGTTAGCATTATGGGGTCCCAATGGTTGGGGTGTA  
TTTGCCCGCCACCTTTGACATATTTCCGCCGTACATCAGCGTTAACTGCTCCGCCAGCTCTGGTTCCGGGCA  
TGGAGGGCTTAGGAACTGCAGGATCACCCTAGGCGCCGTCCGAGGCTCTTGAGAAGCAATATTTCTCATCGC  
TAACGACTTTGGAGCACCGGTAGTAGTGATGGGAGGGAATTGAGAGGGAAGCGGCACACTGCCATAATGTCA  
AGCGAAATTGGCTTCCACCAATTTCCGCGAGACAAAGGATAGAGTGGCACAAGAGTGAGACACTGCTCTGAGCA  
GCTCTCCTAGTATTCAATCAACAATACAGCTTTGTTTGTATCAAAATATATATCGTCTGCTTTTCATCTTTGA  
ATGTTGCGATGGAAGCTTCGGCTGGCCCCGAGCTCACCGGAGATCGGCGTTTTGTTGATCCGAGCTAAGGCCGT  
CGGACCTAATTCAAAATTTTGGTGAAAATCTTGAACGAAGTCGAAGAACCAGTTGAACATCTTCTATACAGC  
GCCATTGAGCATTGGATTGACTCGCCTTGAGTCCCTTACCGTTTTACCTGGGCCCTTGGTGCCGTGGCTTTTT  
TCGCTTTCGTCAGCCCCGCGATGGTGTCTTACACCACGAGCTAAATTAATACTTACCCCCAGATCTCG  
ACATTGAACGGTTTGATATAAGGCGATATAACCACT**ATGGCTGCGGGCGGCATACCGGGCTTTAATGCCAGAA**  
**CATCCCTTCCACTACGGCTCTTCACTTCCGTCAAAACCCCCATTATCAGCCATGCGTACGGTACCTTCATCA**  
**ATCTCGAAAACCCCGCAACAGTGCCATCACCTACCCCATTCGTGCCCGATGTCGAAACATTCCTACGCCTAAT**  
**TGGGCGAAACATGTCCAGATATTCAGCAAAATCACCGATGGAAGCAATTGTTTACAGCGGACTCGGCTGAGC**  
**TTGAGAATTGGGCATAGAAATGACAAGGGACAGACGATACATACTGCGGTGGAGAGAGAAATTCAGACAGCA**  
**GGACTACGGCCCAGGAGGTGATTTGAAAACGTTGTTGACGGTGTGCTGAGCTGAGAGCTGTTGAGGTCCCC**  
**GTCGAAAAGTCAAAGAGTGCAAAAACCTACCAATGCCACCGACGGAGAGTCCCTAGATGTTAGCACAATGGGCA**  
**CCGCTACCCTTACACCTGGAATGCGTTATGCGATTGTCAATCTACCACCAGGCGAAACAGAGCTCAAGGATAC**  
**TTCCAAGCCACTCAAAAAGTTTGCCCATTTATAAATTGCACCACGGGAATATGATCAAGGGGCCGTATGCTCAG**  
**ATTATTCCAAACACATGGAGTACCGCCGTCAAGGTTTACGTTACTGATGGCATGTGGGAGCATAAGCGTGGCA**  
**GAAAGATTGACGGTGGTCAGAGAAGACAGAAGGAGATCAGAGCGAAGAGAGCGTTGGCGGAGAGGAGGAATGC**  
**TCAGGCAGCTGCTTAGCGCTTTGTAGCGTTCGGAGTTGAAAGGGGGCACGGGATTAACGACGTTGCTGGCTGG**  
**TTACTTCTGACATTACTGGCTTGGATATCGCTGTTTAGATGCTAGATTATCCAGCTACGGGAAGATGTACT**  
**ATTTCCAATGTATATTACCATTTTGTCTGCACCAAAGCTAACGGAGTAACGCAACTTTCCTGTTTCATCTA**  
**GAGTATTGTAATAAATGGCTGTATTAGAATAATACTATTATCTACATCCCCATCTTCAAAGCATGGTCAA**  
**AGAAAGTTTTTATTACATATGCTCTATTCCGAAAACCTATTTGCGTGACCATAAAGTGCAAATATGGCTCGGT**  
**GTATAAACGTAAGAAAAGAGAAGAAATAAATTAGCAAGAAGCAAGAAATTTAACATGATTCATCCGCAGTCG**  
**TGATTA**TCA**TTTCTGGGAAGGCTGCTTTTCGCTTCTCCACGAGACCATTGGGTGCGCAAGGGGCTTCGAGAAG**  
**AGGGACTATTAATGCAAAGTTAGTAAATCGAGCAAAATAAAAAGGAGCGTAATATGCCAAACTTACCGAATA**  
**GTCAGTTGGCGGCACAACATCTTTGGTGCCCTCAACTTGCTTCCATTTTCATTAGTCTGGCTAACGTAGCTGTT**  
**ACGGTTCCAAGCTGAACATATGCAAATGTTTACCAGATGCATCTGTGTCTGCCTGAGCCGAATGGGAGGTAAG**  
**GGCTGTTGGCACCCCTTGCTAACCAAACCGTATCCGTAATCTGTCTTTTCTTCACTGGCCTCGACTACGGTGAC**  
**ACCGACGTTGTTCTCCCATCGGTGAGGGTTCAAACAAGAGGGTCAGGGAAGTACTGAGGGTCTCGTGAGGGA**



ACACCAGGAGCGGCAAGGAGGTTGTGAGAGGTTGGGACAACATAGTTAGTTCCTTCAACGGGCATAGGGGATT  
TAACAGCACGGAGGATAGAGTGGATGGGAGCGTGGAGGGGAGAGTCTCCTTGATTACATTGTTGTGAAGATC  
AAGTTTCTGGAGAGATTCGTAGGTGAGTGGTGGGAAGATCCTCGCCGAGAACACGTTTCTGTTCCTCGTAGAGT  
TCCTCGAGAATATCTGGACGGCTGGCAAGGCGGAGAACGATCCAGGAGCCGGTGGAGGAAGAAGAGTGCTGGC  
CAGCCATAAGAAGAGCAATCATCATGTGGGCGACTTCGATATCTGGAATTGGCGTTCCATTCTTGTACACGGA  
CGACATCAAGTTCATACCATGTCTCGGAGTCTTTCTCTCACCAGCCTCACGTCGCTGACGGATGATGTCTG  
GTGTAACCTGGGCCATCTTCTTTTGTAGCACGGTCACGCTTGC GGTTGTGTGGGAAGGGGAACCATGGGAACA  
TGAAGTTGATGGCGGCGAAGCCCATGTTCGAGATCGGAGTAGAGTTCCGCAAAGCTGGAATCGAACTTTCCTCG  
CACCTCCTTGCCCTGTAGAGATCGAGAGGCGGTGTAGATGGTGATTTACGCCATGACCTTGCTGACGTTGAAA  
ACTCCGGAGTCGCCCTTGAAGACGGGGGAGGACTCGAAGAACTGCTCAACTTCCTTGGTGATCAGGGTGACAT  
AGGATCGGAGAGCTTCAGAGGTGAGGCCGAACCTGACGAACTGGTAGACGATTAAATTAGCAATGGAGGCCCA  
GGAGATGTAGACGGGAATAAAATGCTGTACACACCTTCTTCTGCTCCATGAGCTTGGAGTTTGGGCAATCATA  
CACCACATGTCTCGAACACTGGGGTGGTGAGGGGGGAGTAGACATCCTCCGCGCAAACATCCTTGAGCTTG  
CCGTTCAAATGAAATCATTTCCTTTGTACCGAGAAAAACAGTCGTCTTCTTGCCAGCAGTATGAATGTGA  
AGATGTCTCCATACTAGAGTACCGAAATTATTTATACGTTAGCTTTGCGCAACCTGGTATATAGCTAAGTTGA  
ATTGCACCAACTAACCTTCTCCTTGCAGTCGTCAAAGAACTTGTACGGGTCAATTCCATAGGAGATCGTGCTT  
CCAATGACCGGAACCCAGTGAAGACCACCGGAGGCTTTGTAGGGTCCCTTGAACAGGAGCTGCTGCAGGACGT  
TGATAACAATGGAGAGGACGATAAAAGCCGATACGGCACTTGCAGACGAGCGCGGGTGGACAGGGTCGAGCA  
GTTCTCGCAGAAACGAGAGACAATGTCGGCTAAGAGGCC**CT**GGTGATCGTCTTATCCTCCTGCTTCCGCTCA  
AGACTTGTTTCGTTGTTTGTGATGAATGCCTTGAAGCTGCTGCGGACGAAGCAAGGGAAAAAAAAAAGTTGCATC  
TTGAGATCGAACTCGCATTTTATGCAAGGGGGCGTACGGTACTGTAAGATAATGCATTGTTTCTGGTATTTTA  
CGTCGTTTTTTTATTGGTTTACAGCTGCATCTCCAATACCAAATTACCGCTGCCCTTCTGCCCCCTTTTTCT  
CCCTTGCGGCGAGCAGGCCAACGGCCGTCGAGATGATTACAATTCGAGCTCGCGACGGGGCGGAGACGGTCCC  
TGACGGTGTTTCGTGCAGGGCGTCATCTCCTCCGCTGGATTCTCTGCTGCCTGAGCGAGCGAGACCTGACGGT  
GGGCGCATCATCAGGCCATCGCGGCTTACGGGAGGCCGGCTTAGTCATGGCAGGTTAAGCTATCAACGGTCCG  
TCAATATTAATATTGTTATTATTGTCCGGTGGTGGAGTGAGAAGAGACTGTAATTACATTGCCAGTGGACGCT  
ATTGTACCCATAGTTATATCACTCAAAAATGAAATCCTAAACACGAGAATCGCCGTCGTCTCCAAGGCAGCGA  
CCAAGCCGGTTTTTCTGCTGCTTTTCGGTTAGTTGGCCCCCTATCACCTTCAACCGGGGGGTATAGTTAAAG  
AAAAAATTAAGAAAGATCACAATCAATATAAACGAAAAAGGAATTGGAAACAAAAGTCCGGAATAGCACGGTA  
TAGCTAGCAGAAATACCATCCCAAGACGGATCGGGCTTCTG**CT**ACCTCTTTCTTTCTCGTGGAGTCTTGTCTGC  
GTCGTCTTGGTGGACAACCTGGCTTCCGTGCCTCACTCTCAAGCTCCAGCGAGTCGTCAGACTGCTCATCGAAT  
AACACCTGGTCTCCACTTCCACCGAGTTCATGAACTCCTTTGAGTTCGGTTGCCAGCCGGTTTGGGCTCCT  
GGGCTCGAGGCACAGGATGATTCTGGTATATAGTTATGTCTGGGAAGCAGGGTCGTCTTCTTGGTCTTAC  
CACCTGCTTGACCGTGACTTCATGTATGTCACTCAACAGCCTGCGGACCATAGTTGGCCGGCGTTCTTTGGAC  
ACCCTCAGGCCACCGATGGCCCCGGCTAGGTCATCGGTGCTGTCTGCCACCCTAGGCTCATCGGGGTCGATGC  
AGTGATCCATGGGTGCTGGAGACACTCATCTACTTTCAAACGCTCCTTACGTCGACTTCGATCATGGAGTCG  
ATAAGGTCCATGGCTCTATAATCGATTGTGTAGTGGAGTCCAGTATGGAAGAGGATACTTAAATATTCGAG

CTGGATCTGCTCTTTCTGAGTGTATGGGTAGTCTCTTGGGTGGTACAGTTCATCTGAGAAAGGAGGGAATCCG  
CACAGGCAGATGTAGAGTACCACTCCGAGTGACCAGATGTCAACCGCTCGGGTGTACATTCTGGCTTCAGCGT  
TTTCTGCCAGTATCTCAGGAGCAACATCTGATAAGAATTGTTAGATTACATTTGGTGGATGAAAGCACCAGC  
GTTAACAGAGCAGCAGGGAAACTTACAGCCAGGCGTTCACATCTAGATTTTATGATCTCTTAGTAAGATTGA  
CCCCAGATTTGAACGGCAGAAGGTAGGTGAACTTACAGCGTGGTGGTAAAGGAGTGTTCGCCGACAATCTTTG  
CAAGGCCGAAGTCTGCTAATTTTACGGTAAGATCTTTGTGCGACAACCAGAATGTTCTCTGGCTTTATGTCACG  
GTGAATGATGTTTCGTTTATGCTACGACAACGGTTAGCCATATACTGCCATGAGTCTGATCAACCAGAAAA  
CGAACGACATAACCAGGTATCTCAAACCTTCAAAAAGCTGAATGAATACTTTTCGAGTCTCCTCCTCGCTGAGT  
TTCTGATGCCTAATGATCCAGTTGAACAGTTCGCCCTCTGGCGCAAGCTCAAGAATCAGGAAGACACCATCGC  
TCTCGTCAAAGGTATCCTTTAGGCACAGCATGTTCCGATGGTTGACACTCATCAGCATTCAAATCTCTTGCTG  
TAGTGCTTCACGGTCTAGCCTCTGAACTGCGCCCGGGCGTTTCTCGAAATGTTTGACGGCATACTTGATCCCC  
GTAGAACGTTACGCGCATAGATAAACCGAGGCAAAGTGTCCCCTACCCAGCATATCAAAGAGCTTATACTGCT  
GTCGGAACCTTGCTTGTGTTCCGACTCCGCGGGTAGTTGAAGATGAATCTGGATTCTTGCAGGATGGTAATCTC  
GTCGCCGTTTTTCGAGCTCTCGGCGTTTTGTTCTTGCCGATGATGGCGTCGTTGATGAAAGTGCCATTGATAGAG  
AGATCTTCCACAATTGCAACAAAGTCTCCTCCCCTGTTTTCTGGAATATCAGGCAATGGCGGTTGGATATCG  
TGGGGAGCTTGATCCTGAAATCTGCAGTACCCAGATGGTTAGCAATTGATCACTAGACGGCAGAGAGTATGCA  
ATGGGTAAAGGCATACCCGACTCTGCATGCCGGCCTATAAGATATCCAGCGCGGTTTTATCTCTCTAGTTCAC  
GTTTTGAGGCGTTGCTTTCCGGCGTTGATATGTCTGATGCTGCTCCAATTACCGGTGTAGTATTTGTGCTGTC  
CCGCTTCTTCCAGAACCAATTGGCTCCAAATGTTATCTAGCGGAGTAAGATATCCCCATATGCCCTGGGCCA  
CCTCGTCTTCCACATCGTCAATGGATTGGATTGGGGGATACTGAGAGAAACCCTGGGTGGGACATGACGACTC  
GTCTGGCGATTGACCTCGAGGCGCCTGGTTTCGGCGGCCCTTCTGGGGGAGAACTGTAGCAACTTCACGCTTT  
TCTTCTGAGATTACTTCATTAGCTAGGGGAGAAGGTAGATATCCGGCATCCTGCTGCAATTGAGATGAGATTC  
GAGGAGATCTCCGTGGCTTCTTTGATTTCATGGTCTGGAGCTGCGTTGCCCTGCAGGTTTGGGAAAAGAAGTTA  
GCAGCTTGAATATTTTCATCCTTCTGAGAAACTAATTGGATATAACGTGTTTCATATCTTACCCTTTCTCTCTT  
CAGATTGCTTCTCTCCCTCTGCGGAGGCATGTTTTGGCCCGGCGTGAAGAAGTTGACGGCAGTTACGAATATC  
CCGGATGGACTGCCAATGGCTTCGCAACTTCAACTCCAAGTCGATGGCAGGCAAGATCAAGCCCCAACACT  
CTACCGTAGTTGCAAGACCGAACAGTGTGCTGTGCAAGGTGGTAGAAGCAGTTCAGCAGAGAGAGGCAGCGT  
GTGAGTCTACCTGCTACCCCGTACTATGTATATCCCGACTATGAGACAGCCGCCGAGGTGTGCGGAGACGAAA  
TAAATAACTAGTTATCTTTTCGGCTCCCTGAGTTCCAGGCCGACAAGCCCAGGCCAAGCTGCAGCAAGCCCC  
AAGCAAGAGAACGACGGCGCTTAGAGTCAATGGCAGGCCAGGCTGAGCGAACTTCCCTTGCTCGACCTTTTTT  
TTCTGTGCGAAAGATGCGAAGTCGCTCTTTATAGCGAAGTGGATCATCTCGTAGATGGCCTAGGTAAACAACT  
GCATATGTACCTTACCAGAGCTTCTTATCTTTTCCAGAAATAACCAATGTTAGCATTATGGGGTCCCAATGGTTG  
GGGTGATTTTGGCCGCCACCTTTGACATATTTCCGCCGTACATCAGCGTTTAACTGCTCCGCCAGCTCTGGT  
TCGGGCATGGAGGGCTTAGGAACTGCAGGATCACCCTAGGCGCCGTCGAGGCTCTTGAGAAGCAATATTTT  
TCATCGCTAACGACTTTGGAGCACCGGTAGTAGTGATGGGAGGGAATTGAGAGGGAAGCGGCACACTGCCAT  
AATGTCAAGCGAAATTGGCTTCCACCAATTTCCGCGAGACAAAGGATAGAGTGGCACAAGAGTGAGACACTGCT  
CTGAGCAGCTCTCCTAGTATTCAATCAACAATACAGCTTTGTTTTGTTATCAAATATATATCGTCTGCTTTCA

TCTTTGAATGTTGCGATGGAAGCTTCGGCTGGCCCGAGCTCACCGGAGATCGGCGTTTTGTTGATCCGAGCTA  
AGGCCGTCGGACCTAATTCAAAATTTTGGTGCAAATCTTGAACGAAGTCGAAGAACCAGTTGAACATCTTCT  
ATACAGCGCCATTGAGCATTGGATTGACTCGCCTTGAGTCCCTTACCGGTTTACCTGGGCCCTTGGTGCCGTG  
GCTTTTTTCGCTTTCGTACGCCCCGCGATGGTGTCTTACACCACGAGCTAAATTTAAAATCTTACCCCCCA  
GATCTCGACATTGAACGGTTTTGATATAAGGCGATATAACCACT**ATGGCTGCGGCGCGCATACCGGGCTTTAAT**  
**GCCAGAACATCCCTTCCACTACGGCTCTTCACTTCCGTCACAAACCCCCATTATCAGCCATGCGTACGGTACC**  
**TTCATCAATCTCGAAAACCCGCAACAGTGCCATCACCTACCCATTTCGTGCCCGATGTCGAAACATTCCTACG**  
**CCTAATTGGGCGAAACATGTCCAGATATTCCAGCAAATCACCGGATGGAAGCAATTGTTTACAGCGGACTCG**  
**GCTGAGCTTCGAGAATTGGGCATAGAAATGACAAGGGACAGACGATACATACTGCGGTGGAGAGAGAAATTC**  
**GACAGCAGGACTACGGCCCAGGAGGTGATTCGAAAACGTTGTTGACGGTGTGCTGAGCTGAGAGCTGTTGA**  
**GGTCCCCGTGCGAAAAGTCAAAGAGTGCAAAAACCTACCAATGCCACCGACGGAGAGTCCCTAGATGTTAGCACA**  
**ATGGGCACCGCTACCCTTACACCTGGAATGCGTTATGCGATTGTCAATCTACCACCAGGCGAAACAGAGCTCA**  
**AGGATACTTCCAAGCCACTCAAAAAGTTTGCCATTATAAATTGCACCACGGGAATATGATCAAGGGGCCGTA**  
**TGCTCAGATTATTCCAAACACATGGAGTACCGCCGTCAAGGTTTCAGGTTACTGATGGCATGTGGGAGCATAAG**  
**CGTGGCAGAAAGATTGACGGTGGTCAGAGAAGACAGAAGGAGATCAGAGCGAAGAGAGCGTTGGCGGAGAGGA**  
**GGAATGCTCAGGCAGCTGCTTAGCGCTTTTGTAGCGTCGGAGTTGAAAGGGGGCACGGGATTAACGACGTTGC**  
**TGGCTGGTTACTTCCCTGACATTACTGGCTTGGATATCGCTGTTTAGATGCTAGATTATCCAGCTACGGGAAG**  
**ATGTACTATTTCCAATGTATATTACCATTTTGTCTTCTGCACCAAAGCTAACGGAGTAAGTCAACTTTCCTGT**  
**TCATCTAGAGTATTGTAATAAATGGCTGTATTAGAATAATACTATTATCTACATCCCCATCTTCAAAGCAT**  
**GGTCAAAGAAAAGTTTTTATTACATATGCTCTATTCCGAAAACCTATTTGCGTGACCATAAAGTGCAAATATG**  
**GCTCGGTGTATAAACGTAAGAAAAGAGAAGAAATAAATTAGCAAGAAGCAAGAAATTTAACATGATTCAATCC**  
**GCAGTCGTGATTA**TC**ATTTCTGGGAAGGCTGCTTTCGCTTCTCCCACGAGACCATTGGGTGCGCAAGGGGCTT**

**CGAGAAGAGGGACTATTAATGCAAAGTTAGTAAAATCGAGCAAATAAAAAGGAGCGTAATATGCCAAACTTA**  
**CCGAATAGTCAGTTGGCGGCACAACATCTTTGGTGCCTTCAACTTGCTTCCATTTTCATTAGTCTGGCTAACGT**  
**AGCTGTTACGGTTCCAAGCTGAACATATGCAAATTGTTACCGATGCATCTGTGTCTGCCTGAGCCGAATGGG**  
**AGGTAAGGGCTGTTGGCACCCCTTGCTAACCAAACCGTATCCGTAATCTGTCTTTTCTTCACTGGCCTCGACTA**  
**CGGTGACACCGACGTTGTTCTCCATCGGTGAGGGTTCAAACAAGAGGGTCAGGGAAGTACTGAGGGTCTCG**  
**TGAGGGAACACCAGGAGCGCAAGGAGGTTGTGAGAGGTTGGGACAACATAGTTAGTTCCCTTCAACGGGCATA**  
**GGGGATTTAACAGCACGGAGGATAGAGTGGATGGGAGCGTGGAGGCGGAGAGTCTCCTTGATTACATTGTTGT**  
**GAAGATCAAGTTTCTGGAGAGATTTCGTAGGTGAGTGGTGGAAGATCCTCGCCGAGAACACGTTTCTGTTCCTC**  
**GTAGAGTTCCCTCGAGAATATCTGGACGGCTGGCAAGGCGGAGAACGATCCAGGAGCCGGTGGAGGAAGAAGAG**  
**TGCTGGCCAGCCATAAGAAGAGCAATCATCATGTGGGCGACTTCGATATCTGGAATTGGCGTTCCATTCTTGT**  
**ACACGGACGACATCAAGTTCCATACCATGTCTCGGAGTCTTTCTCTCCACCAGCCTCACGTGCGTACGGAT**  
**GATGTCGGTGTAACCTGGGCCATCTTCTTTGAGCACGGTCACGCTTGCGGTTGTGTGGGAAGGGGAACCAT**  
**GGGAACATGAAGTTGATGGCGGCGAAGCCCATGTCGAGATCGGAGTAGAGTTCCGCAAAGCTGGAATCGAACT**  
**TTCTCGCACCTCCTTGCCCTGTAGAGATCGAGAGGCGGTGTAGATGGTGATTTACCCATGACCTTGCTGAC**  
**GTTGAAAACCTCCGAGTCGCCCTTGAAGACGGGGGAGGACTCGAAGAAGTCTCAACTTCTTGGTGATCAGG**

GTGACATAGGATCGGAGAGCTTCAGAGGTGAGGCCGAACCTGACGAACTGGTAGACGATTA AATTAGCAATGG  
AGGCCCAGGAGATGTAGACGGGAATAAATTGCTGTACACACCTTCTTCTGCTCCATGAGCTTGGAGTTGGGC  
AATCATAACACCACATGTCGTCCGAACACTGGGGTGGTGAAGGGGGAGTAGACATCCTCCGCGCAAACATCCTT  
GAGCTTGCCGTTCAAAATGAAATCATTTCCTTTGTACCGAGAAAAACAGTCGTCTTCTTGCCCAGCAGTATG  
AATGTGAAGATGTCTCCATACTAGAGTACCGAAATTATTTATACGTTAGCTTTGCGCAACCTGGTATATAGCT  
AAGTTGAATTGCACCAACTAACCTTCTCCTTGCAGTCGTCAAAGA ACTTGTACGGGTCAATTCATAGGAGAT  
CGTGCTTCCAATGACCGGAACCCAGTGAAGACCACCGGAGGCTTTGTAGGGTCTTGAACAGGAGCTGCTGC  
AGGACGTTGATAACAATGGAGAGGACGATAAAAGCCGATACGGCACTTGCAGACGAGCGCGGGTGGACAGGG  
TCGAGCAGTTCTCGCAGAAACGAGAGACAATGTCGGCTAAGAGGCC**CAT**GGTGATCGTCTTATCCTCCTGCTT  
CCGCTCAAGACTTGTTTCGTTGTTTGTGATGAATGCCTTGAAGCTGCTGCGGACGAAGCAAGGGAAAAAAAAG  
TTGCATCTTGAGATCGAACTCGCATTTTTATGCAAGGGGCGTACGGTACTGTAAGATAATGCATTGTTCCCTGGT  
ATTTTACGTGCTTTTTTATTGGTTTACAGCTGCATCTCCAATACCAAAATTACCGCTGCCCTTCTGCCCCCT  
TTTTCTCCCTTGCGGCGAGCAGGCCAACGGCCGTCGAGATGATTACAATTCGAGCTCGCGACGGGGCGGAGAC  
GGTCCCTGGACGGTGTTCGTGCAGGGCGTCATCTCCTCCGCTGGATTCTCTGCTGCCCTGAGCGAGCGAGACCT  
GACGGTGGGCGCATCATCAGGCCATCGCGGCTTCAAGGGAGCCGGCTTAGTCATGGCAGGTTAAGCTATCAAC  
GGTCCGTCAATATTAATATTGTTATTATTGTCCGGTGGTGAAGTGAAGAGACTGTAATTACATTGCCAGTG  
GACGCTATTGTACCCATAGTTATATCACTCAAAAATGAAATCCTAAACACGAGAATCGCCGTCGTCTCAAGG  
CAGCGACCAAGCCGTTTTTCTGCTGCTTTTCGGTTAGTTGGCCCCCTATCACCTTTCAACCGGGGGGTATAG  
TTAAAGAAAAAATTAAGAAAGATCACAATCAATATAAACGAAAAGGAATTGGAAACAAAAGTCCGGAATAGC  
ACGGTATAGCTAGCAGAATACCATCCCAAGACGGATCGGGCTTCTG**CTAC**CCTCTTTCTTTCTCGTGGAGTCTT  
GTCTGCGTCGTCTTGGTGGACAACCTGGCTTCCGTGCCTCACTCTCAAGCTCCAGCGAGTCGTGACTGCTCA  
TCGAATAACACCTGGTCTCCACTTCCACCGAGTTCATGAACTCCTTTGAGTTCCGGTTGCCAGCCGGTTTGG  
GCTCCTGGGCTCGAGGCACAGGATGATTCTGGTATATAGTTATGTCTGGGAAGCAGGGTCGTCTTCCCTGGT  
CTTACCACCTGCTTGACCGTGACTTCATGTATGTCACTCAACAGCCTGCGGACCATAGTTGGCCGGCGTTCT  
TTGGACACCCTCAGGCCACCGATGGCCCCGGCTAGGTCATCGGTGCTGTCTGCCACCCTAGGCTCATCGGGT  
CGATGCCAGTGATCCATGGGTGCTGGAGACACTCATCTACTTTCAAACGCTCCTTCACGTCGACTTCGATCAT  
GGAGTCGATAAGGTCCATGGCTCTATAATCGATTGAGTCCAGTATGGAAGAGGATACTTAAATATTCGAGC  
TGGATCTGCTCTTTCTGAGTGTATGGGTAGTCTTTGGGTGGTACAGTTCATCTGAGAAAGGAGGGAATCCGC  
ACAGGCAGATGTAGAGTACCACTCCGAGTGACCAGATGTCAACCGCTCGGGTGTACATTCTGGCTTCAGCGTT  
TTCTGCCAGTATCTCAGGAGCAACATCTGATAAGAATTGTTAGATTCACATTTGGTGGATGAAAGCACCAGCG  
TTAACAGAGCAGCAGGGAAACTTACAGCCAGGCGTTCCACATCTAGATTTTATGATCTCTTAGTAAGATTGAC  
CCCAGATTTGAACGGCAGAAGGTAGGTGAACTTACAGCGTGGTGGTAAAGGAGTGTTCGCCGACAATCTTTGC  
AAGCCGAAGTCTGCTAATTTTACGGTAAGATCTTTGTGCGACAACCAGAATGTTCTCTGGCTTTATGTCACGG  
TGAATGATGTTTCGTTTCATGCTACGACAACGGTTAGCCATATACTGCCATGAGTCTGATCAACCAGAAAAC  
GAACGACATAACCAGGTATCTCAAACCTTCAAAAAGCTGAATGAATACTTTTCGAGTCTCCTCCTCGCTGAGTT  
TCTGATGCCTAATGATCCAGTTGAACAGTTCGCCCTCTGGCGCAAGCTCAAGAATCAGGAAGACACCATCGCT  
CTCGTCAAAGGTATCCTTTAGGCACAGCATGTTCCGGATGGTTGACACTCATCAGCATTGAAATCTCTTGCTGT

AGTGCTTCACGGTCTAGCCTCTGAACTGCGCCCGGGCGTTCCTCGAAATGTTTGACGGCATACTTGATCCCCG  
TAGAACGTTTCAGCGCATAGATAAACCGAGGCAAAGTGTCCCCTACCCAGCATATCAAAGAGCTTATACTGCTG  
TCGGAACCTTGCTTGTGTTCCGACTCCGCGGGTAGTTGAAGATGAATCTGGATTCTTGCAGGATGGTAATCTCG  
TCGCCGTTTTTCGAGCTCTCGGCGTTTTGTTCTTGCCGATGATGGCGTCGTTGATGAAAGTGCCATTGATAGAGA  
GATCTTCCACAATTGCAACAAAGTCTCCTCCCCTGTTTTCGTGGAATATCAGGCAATGGCGGTTGGATATCGT  
GGGAGCTTGATCCTGAAATCTGCAGTACCCAGATGGTTAGCAATTGATCACTAGACGGCAGAGAGTATGCAA  
TGGGTAAAGGCATACCGCACTCTGCATGCCGGCCTATAAGATATCCAGCGCGGTTTATCTCTCTAGTTCCACG  
TTTTGAGGCGTTGCTTTCGGCGTTGATATGTCTGATGCTGCTCCAATTACCGGTGTAGTATTTGTGCTGTCC  
CGTTCTTTCAGAACCAATTGGCCTCCAAAATTGTTATCTAGCGGAGTAAGATATCCCCATATGCCCTGGGCCA  
CCTCGTCTTCCACATCGTCAATGGATTGGATTGGGGGATACTGAGAGAAACCCTGGGTGGGACATGACGACTC  
GTCTGGCGATTGACCTCGAGGCGCCTGGTTTCGGCGGCCTTCTGGGGGAGAACTGTAGCAACTTCACGCTTT  
TCTTCTGAGATTACTTCATTAGCTAGGGGAGAAGGTAGATATCCGGCATCCTGCTGCAATTGAGATGAGATTC  
GAGGAGATCTCCGTGGCTTCTTTGATTTCATGGTCTGGAGCTGCGTTGCCCTGCAGGTTTGGGAAAAGAAGTTA  
GCAGCTTGAATATTTTCATCCTTCTGAGAACTAATTGGATATAACGTGTTTCATATCTTACCCTTTCTCTCTT  
CAGATTGCTTCTCTCCCTCTGCGGAGGCATGTTTTGGCCCGGCGTGAAGAAGTTGACGGCAGTTACGAATATC  
CCGGATGGACTGCCAATGGCTTCGCAACTTCAACTCCAAGTCGATGGCAGGCAAGATCAAGCCCCAACACACT  
CTACCGTAGTTGCAAGACCGAACAGTGTGCTGTGCAAGGTGGTAGAAGCAGTTTACGACAGAGAGAGGCAGCGT  
GTGAGTCTACCTGCTACCCCGTACTATGTATATCCCGACTATGAGACAGCCGCGAGGTGTGCGGAGACGAAA  
TAAATAACTAGTTATCTTTTCGGCTCCCTGAGTTCAGGCCGACAAGCCCAGGCCAAGCTGCAGCAAGCCCC  
AAGCAAGAGAACGACGGCGCTTAGAGTCAATGGCAGGCCAGGCTGAGCGAACTTCCCTTGCTCGACCTTTTTT  
TTCTGTGCAAGATGCGAAGTCGCTCTTTATTAGCGAAGTGGGATCATCTCGTAGATGGCCTAGGTAAACAAC  
TGCATATGTACCTTCACCGAGCTTCTTATCTTTCAGAATAACCAATGTTAGCATTATGGGGTCCCAATGGTT  
GGGGTGTATTTGCCCGCCCACCTTTGACATATTTCCGCCGTACATCAGCGTTTAACTGCTCCGCCAGCTCTGG  
TTCGGGCATGGAGGGCTTAGGAACTGCAGGATCACCCTAGGCGCCGTCCGAGGCTCTTGAGAAGCAATATTT  
CTCATCGCTAACGACTTTGGAGCACCGGTAGTAGTGATGGGAGGGAATTGAGAGGGAAGCGGCGACACTGCCA  
TAATGTCAAGCGAAATTGGCTTCACCAATTTGCGGAGACAAAGGATAGAGTGGCACAAGAGTGAGACACTGC  
TCTGAGCAGCTCTCCTAGTATCAATCAACAATACAGCTTTGTTTGTATCAAATATATATCGTCGTCTTTC  
ATCTTTGAATGTTGCGATGGAAGCTTCGGCTGGCCGAGCTCACCAGGATCGGCGTTTTGTTGATCCGAGCT  
AAGGCCGTGCGACCTAATTCAAAATTTTGGTGCAAAATCTTGAACGAAGTCGAAGAACCAGTTGAACATCTTC  
TATACAGCGCCATTGAGCATTGGATTGACTCGCCTTGAGTCCCTTACCGTTTTACCTGGGCCCTTGGTGCCGT  
GGCTTTTTTTCGCTTTCGTACGCCCCGCGATGGTGTCTTACACCACGAGCTAAATTAAAATCTTACCCCCC  
AGATCTCGACATTGAACGGTTTGATATAAGGCGATATAACCACTATGGCTGCGGCGCGCATACCGGGCTTTAA  
TGCCAGAACATCCCTTCCACTACGGCTCTTCACTTCCGTCACAAACCCCCATTATCAGCCATGCGTACGGTAC  
CTTCATCAATCTCGAAAACCCGCAACAGTGCCATCACCTACCCATTTCGTGCCGATGTCGAAACATTCCTAC  
GCCTAATTGGGCGAAACATGTCCAGATATTCAGCAAAATCACCGGATGGAAGCAATTGTTTACAGCGGACTC  
GGCTGAGCTTCGAGA

[Read No.m64281e\_230311\_112734/128582552/ccs] [Antisense (-) strand]

GGT~ATT (5'UTR)

CTA~CAT (*chkB* protein kinase genomic DNA) (Reverse sequence)

TCA~CAT (*TinCYP51B* gene) (Reverse sequence)

AGC~TTA (3'UTR)

ATG~TAG (*FYV4* genomic DNA) (Forward sequence)

~ACG (Downstream sequence of the 7374 block)

GCTCTCTTAACCAACTTCCTGAGGATCCTACCATAGTTGCTGTTGGATTTCAAGAGATTGTTGAGCTTAGCCC  
CCAGCAGATTATGTCCACTGACCCAAGCACGCGCAAGATATGGGAACACGCAGTTATATCATCACTCAATGCC  
AGGACCACGAAGAGAGGGACGACTGAGTACGTTTTGCTGAGAAGTGGTCAGCTAGTGGGTGCAGCACTCTTGC  
TGTTTCGTAAAGAAGGATGTTATAAATAAGATCAAGAATGCGGAAGGCAGCTTGAAGAAGGTATCCATCCTTTG  
AATATAATATCTTTTGAGAAGCAGGGCTAACTGGACTGAGTAACAGACTGGCTTATCTGGCATGGGAGGGAAT  
AAGGGTGCTGTTGCTATCCGCTTGGACTATAGTAATACGTCAATATGCTTCATCACTGCTCATCTAGCTGCTG  
GCTTCTCGAACTACGAGGAAAGAAACAGAGACTACCACACCATAGCTCGGGGTCTCAGGTTCCAACGAAACAG  
ACCTATTGTCGGACATGATGCAACAATCTGGTTCGGTGATTTCAACTATAGGATTGGCCTTAGCAATGAGCGG  
GTGAGGCCTCTAATTGAATCGGGAGATATAGATGTACTATATCAGCATGACCAGGTATGTCTCTTGATGCGCG  
AATACATGCCCTGACTACTACTAACTTTCAATAGCTCAACCTCCAAATGGTTGCTGGCCTTGCAATCCAGTAT  
TATATGGAAGGGCCTGTACATTCCTCCAACATATAGATACGACAATGGCACAGATGAATATGACACCTCGT  
AAGTTTGAGAGGCAGTCCATCCATTTAGACCTGTAAATACTAATAACTTCTAGAGAAAAGCAAAGGATTCC  
CGCCTGGTGCACAGGATCCTTTGGAGAGGAAGGATTCTACGACAGCTAGCCTATACGACTGCACCTTTGAAA  
TTTTTCGGACCATCGACCTGTTTATGCAACATTCGAGTGCATATATCGACGGTAGATGAGAAGCGAAAGGAAG  
AAATAAGCTGTCGACTTTATGAAAAGCTGAAGCAACAACCTGCCACCACAACCTACAAACCCGTTGTCTGATGA  
TGAGGAAGATGATAATGAACAATACTCGATAAAGCTAGGCCTTCCACCTCCAGCTCCGAAAAGCGTAAGTGG  
TGGCTTGATCATGGTGTAGTATATTTGACTTAGTTAACTAGTTCGGCTCTTTAGCATTGATATGTTAAAGCTAAC  
AATTTTATAGGCCTTCCTGCTCGATCAACTATTACTCCACCCTTGGTGTGTGAGCAATGTTTCGGCGAAGTG  
CCAATCCTTTTTTCATTTTCTCGGGGGTTCGGATTGGATTACTGTTCGGAAGAGATGATGCTTTGAGCGAAATGAG  
CGAGCAGGACCTACGAGAGTCGAAAAAGGCATCCTCCACATACAGAGAGCCATTTAGATCGGTGGGAGAAGTT  
ATGGGCGGTCTGAATCGTCTGCCACAGACATGCCTCAAACCTCTAAGGTTGTCGTCAGCAGCAGAACTGTAA  
AATCGGTAAAAATACCACCTCCGGTACCTAGGAAACCAGCAAAATTGAGACGACATTCATCAGGCGGAACCGA  
TCGCAAAACCGCCTCAAGTAATGGTGTCTCGAGTGGATACGAAATGGTTAACCTGCGGAGGATTTCCAAGAA  
CAAGCATATACTGGCGGGGCTGGCGCAGCCACTACCTCATCCGTATCACAAGCTACCAAATCACTACCAACGA  
ACGAGCTCATGGATTCAGATGCAGGAACGAGAGTAACTTCGTGGGAGCCCCTTCAACCGAAAAAGTGACCGAA  
TGTTTAGGTGTTTTACGGCTAGCCAAAGGCTTTTAAAGTTGGAAAGCGGTAACCTCCATAGAATCACTTTGAAA  
CCATATATCATCAACGTCTCTCTCTATGCATGGCAGCCCAAGGCCTATTCTACCAGATTATATATGATGTCA  
AGTACACAATGAATCCTGCAGTACTAAAGAGGGTAGGCGTTATCAAGTAGGGTGCTGCTTTTTGAATTTCAAC  
CCATTACTTTGAGGGTGGGCTTCAAATTAGGAGATATCCCCCTTTTTGATAGATCAACCCCAAGGTCAAACA  
ATGCCGCTGGTTTGTGGCCATCAGGGAACTGCCTGGGCTCATGAAAGCATAGATTTACGCGTATCGGCTTCC

TGCTGAGTGTGGTATAGGGCCTGCTACTGACGTCTCCTCCGATTGGTAAGGCTGCAGCTCATTAACCAAAT  
TGGGCTCTCATTGAGGCCGATGTTTACACAGCATTGCACCCACAAAGAGGAGCGCCCAGAATGTTGTGTATCA  
CTTCTTCTTGTAGCATATATTTGTCGGTACGCGATATCTGCTCGCTTGCTAACCAAGGAGCGAGAATTTTTG  
AGTATTATATTCCGGATGGCAAGTCGGATCCTCTCATTTCTTCATAGCTCCGAAATCAAGTTGACGGGACACT  
CCTTTAAATTTTGACTCGTCAATCTCACCAACTCGTCTGCCATATCGTTGCCATTTTCTTTTTCTCCTCTG  
ATTTCCCTAGGCAGGTCCTCGTTCTTAGTTGGTTTAGGCTCAGCAAGCCACCACTGATGCTGCAAGACTTGAGT  
GGCCGTAATTCGTTTCTTGATCAAGTTTTAACATGGAGGCAAGTAGATCGGCCCCCAAAGGTCCAGCTGTC  
GGAAATTGGCGGAGGAAGAATTCGCGGCCTTGTAGGGGTATGACATGGTTTTCTCGATTGGGACGTAGTTGG  
GCAGCTTGTACCCAGGCCAGTTTTCTTCCGTAGGTGCCCAAATGCAGCACAAATTTAGATATTTGGTC  
CATATCCGTGTTTCCAGCGGCAATGGAACGCGCAGAATAAGCTCAGCGAACACCATTCCATTAGACCATAT  
GTCGACTGCACCGGAATATTGCCTGGCGCCGAAGAGTAGTTCTAATGGCCTGTACCATCTTGTGATGACTTGA  
TGTGTCATGTTGAGATATGGATCGGCAAAGGATCTGGCAAGACCAAAATCCGCTAATTTAACTTCTCCATCCG  
ATGCAATTAATAAGTTGTTAGGCTTAATATCACGGTGTAGAATGAAATTCCTTATGACAGAACCACACTCCACG  
TGCAAGCATGCTTATCCATGCTTTTATATCAGCCACACCGTACTGGATAGAGTTGTCTTTGATCAACATTTCA  
AGATCTCCAAGGGGTAAAAATTCAGGACGAGGTTTAGATTTTGATCCTTTGAGGAGAAAACGTATGCAACG  
CAATTACGTTCCGGGTGAGACAGTTCTGAAGTACTTTACTTCACGGATGGCGTCCATGGATAGCCCGTCCTT  
GTACTCGGCGTTTAGTTTTATTTCTTGATTGCAACGAGCGAAGTGGGATCATCTCGTAGATGGCCTAGGTAA  
ACAACCTGCATATGTACCTTCACCGAGCTTCTTATCTTTCAGAATAACCAAATGTTAGCATTATGGGGTCCCAA  
TGGTTGGGGTGTATTTGCCCGCCACCTTTGACATATTTCCGCCGTACATCAGCGTTTAACTGCTCCGCCAGC  
TCTGGTTCGGGCATGGAGGGCTTAGGAACTGCAGGATCACCACTAGGCGCCGTCCGAGGCTCTTGAGAAGCAA  
TATTTCTCATCGCTAACGACTTTGGAGCACCGGTAGTAGTGATGGGAGGGAATTGAGAGGGAAGCGGCGACAC  
TGCCATAATGTCAAGCGAAATTTGGCTTCCACCAATTTCCGCGAGACAAAGGATAGAGTGGCACAAGAGTGAGAC  
ACTGCTCTGAGCAGCTCTCCTAGTATTCAATCAACAATACAGCTTTGTTTGTATCAAAATATATATCGTCGT  
CTTTCATCTTTGAATGTTGCGATGGAAGCTTCGGCTGGCCCGAGCTCACCGGAGATCGGCGTTTTTGTGATCC  
GAGCTAAGGCCGTGCGACCTAATTCAAAATTTTGGTGCAAATCTTGAACGAAGTCGAAGAACCAGTTGAACA  
TCTTCTATACAGCGCCATTGAGCATTGGATTGACTCGCCTTGAGTCCCTTACCGGTTTACCTGGGCCCTTGGT  
GCCGTGGCTTTTTTCGCTTTCGTCACGCCCGCGATGGTGTCTTACACCACGAGCTAAATTAATAATCTTAC  
CCCCAGATCTCGACATTGAACGGTTTGATATAAGGCGATATAACCACT**ATGGCTGCGGCGCGCATACCGGGC**  
**TTTAATGCCAGAACATCCCTTCCACTACGGCTCTTCACTTCCGTACAAAACCCCATTTATCAGCCATGCGTAC**  
**GGTACCTTCATCAATCTCGAAAACCCGCAACAGTGCCATCACCTACCCATTCGTGCCCGATGTCGAAACATT**  
**CCTACGCCTAATTGGGCGAAACATGTCCAGATATTCCAGCAAATCACCGGATGGAAGCAATTGTTTACAGCG**  
**GACTCGGCTGAGCTTCGAGAAATGGGCATAGAAATGACAAGGGACAGACGATACATACTGCGGTGGAGAGAGA**  
**AATTCAGACAGCAGGACTACGGCCAGGAGGTGATTTGAAAACGTTGTTGACGGTGTGCTGAGCTGAGAGC**  
**TGTTGAGGTCCCCGTCGAAAAGTCAAAGAGTGCAAAAACCTACCAATGCCACCGACGGAGAGTCCCTAGATGT**  
**TAGCACAATGGGCACCGCTACCCTTACACCTGGAATGCGTTATGCGATTGTCAATCTACCACCAGGCGAAACA**  
**GAGCTCAAGGATACTTCCAAGCCACTCAAAAAGTTTGCCATTATAAATTCACCACGGGAATATGATCAAGG**  
**GGCCGTATGCTCAGATTATTCCAAACACATGGAGTACCGCCGTCAAGGTTACGTTACTGATGGCATGTGGGA**  
**GCATAAGCGTGGCAGAAAGATTGACGGTGGTCAGAGAAGACAGAAGGAGATCAGAGCGAAGAGAGCGTTGGCG**

GAGAGGAGGAATGCTCAGGCAGCTGCT**TAG** GCGTTTTGTAGCGTCGGAGTTGAAAGGGGGCACGGGATTAACG  
ACGTTGCTGGCTGGTTACTTCCCTGACATTACTGGCTTGGATATCGCTGTTTAGATGCTAGATTATCCCAGCTA  
CGGAAGATGTACTATTTCCAATGTATATTACCATTTTGTCTGCACCAAAGCTAACGGAGTAACTGCAACT  
TTCCTGTTTCATCTAGAGTATTGTAATAAATGGCTGTATTAGAATAATACTATTATCTACATCCCCATCTTCA  
AAAGCATGGTCAAAGAAAGTTTTTATTACATATGCTCTATTCCGAAAACCTATTTGCGTGACCATAAAGTGC  
AAATATGGCTCGGTGTATAAACGTAAGAAAAGAGAAGAAATAAATTAGCAAGAAGCAAGAAATTTAACATGAT  
TCAATCCGCAAGTCGTGATTA**TC**ATTTCTGGGAAGGCTGCTTTCGCTTCTCCCACGAGACCATTGGGTCGCCAA  
GGGCTTCGAGAAGAGGGACTATTAATGCAAAGTTAGTAAAATCGAGCAAATAAAAAGGAGCGTAATATGCC  
AACTTACCGAATAGTCAGTTGGCGGCACAACATCTTTGGTGCCTTCAACTTGCTTCCATTTTATTAGTCTGG  
CTAACGTAGCTGTTACGGTTCGAAGCTGAACATATGCAAATGTTTACCGATGCATCTGTGTCTGCCTGAGCC  
GAATGGGAGGTAAGGGCTGTTGGCACCTTGCTAACCAAACCGTATCCGTAATCTGTCTTTTCTTCACTGGCC  
TCGACTACGGTGACACCGACGTTGTTCTCCCATCGGTGAGGGTTCCAAACAAGAGGGTCAGGGAAGTACTGAG  
GGTCTCGTGAGGGAACACCAGGAGCGCAAGGAGGTTGTGAGAGGTTGGGACAACATAGTTAGTTCCTTCAAC  
GGCATAGGGGATTTAACAGCACGGAGGATAGAGTGGATGGGAGCGTGGAGGCGGAGAGTCTCCTTGATTACA  
TTGTTGTGAAGATCAAGTTTCTGGAGAGATTTCGTAGGTGAGTGGTGGAAAGATCCTCGCCGAGAACACGTTTCT  
GTTCTCGTAGAGTTCCTCGAGAATATCTGGACGGCTGGCAAGGCGGAGAACGATCCAGGAGCCGGTGGAGGA  
AGAAGAGTGCTGGCCAGCCATAAGAAGAGCAATCATCATGTGGGCGACTTCGATATCTGGAATTGGCGTTCCA  
TTCTTGTACACGGACGACATCAAGTTCATACCATGTCTCGGAGTCTTTCTCTCCACCAGCTCACGTCGCTG  
ACGGATGATGTCGGTGTAAACCTGGGCCATCTTCTTTTGGAGCACGGTCACGCTTGCCTTGTGTGGGAAGGGG  
AACCATGGGAACATGAAGTTGATGGCGGCGAAGCCCATGTCGAGATCGGAGTAGAGTTCGCCAAAGCTGGAAT  
CGAACTTTCTCGCACCTCCTTGCCCTGTAGAGATCGAGAGGCGGTGTAGATGGTGAATTCAGCCATGACCTT  
GCTGACGTTGAAAACCTCCGGAGTCGCCCTTGAAGACGGGGGAGGACTCGAAGAAGTCTCAACTTCTTGGTG  
ATCAGGGTGACATAGGATCGGAGAGCTTCAGAGGTGAGGCCGAACTTGACGAAGTGGTAGACGATTAATTAG  
CAATGGAGGCCCAGGAGATGTAGACGGGAATAAATTGCTGTACACACCTTCTTCTGCTCCATGAGCTTGGAGT  
TTGGGCAATCATAACCACATGTCGTCCGAACACTGGGGTGGTGGGGGGGAGTAGACATCTCCGCGCAAAC  
ATCCTTGAGCTTGCCGTTCAAATGAAATCATTTCCCTTTGTACCGAGAAAACAGTCGTCTTCTTGCCAGC  
AGTATGAATGTGAAGATGTCTCCATACTAGAGTACCGAAATTTATTTATACGTTAGCTTTGCGCAACCTGGTAT  
ATAGCTAAGTTGAATTGCACCAACTAACCTTCTCCTTGCAAGTCGTCAAAGAAGTGTACGGGTCAATTCCATA  
GGAGATCGTGCTTCCAATGACCGGAACCCAGTGAAGACCACCGGAGGCTTTGTAGGGTCTTGAACAGGAGC  
TGCTGCAGGACGTTGATAACAATGGAGAGGACGATAAAAAGCCGATACGGCACTTGCGACGAGCGCGGGCGGTGG  
ACAGGGTCGAGCAGTTCTCGCAGAAACGAGAGACAATGTCGGCTAAGAGGGCC**CAT**GGTGATCGTCTTATCCTC  
CTGCTTCCGCTCAAGACTTGTTCGTTGTTTGTGATGAATGCCTTGAAGCTGCTGCGGACGAAGCAAGGGAAAA  
AAAAAGTTGCATCTTGAGATCGAACTCGCATTTTATGCAAGGGGGCGTACGGTACTGTAAGATAATGCATTGT  
TCCTGGTATTTTACGTCGTTTTTTATTGTTTACAGCTGCATCTCCAATACCAAATACCAGCTGCCCTTCTGC  
CCCCTTTTTCTCCCTTGCGGCGAGCAGGCCAACGGCCGTCGAGATGATTACAATTCGAGCTCGCGACGGGGC  
GGAGACGGTCCCTGGACGGTGTTCGTGCAGGGCGTCATCTCCTCCGCTGGATTCTCTGCTGCCTGAGCGAGCG  
AGACCTGACGGTGGGCGCATCATCAGGCCATCGCGGCTTCAGGGAGGCCGGCTTAGTCATGGCAGGTTAAGCT  
ATCAACGGTCCGTCAATATTAATATTGTTATTATTGTCCGGTGGTGGAGTGAGAAGAGACTGTAATTACATTGC



CCAGTGGACGCTATTGTACCCATAGTTATATCACTCAAAAATGAAATCCTAAACACGAGAATCGCCGTCGTCT  
CCAAGGCAGCGACCAAGCCGGTTTTTCTGCTGCTTTTTCGGTTAGTTGGCCCCCTATCACCTTTCAACCGGGGG  
GTATAGTTAAAGAAAAAATTAAGAAAGATCACAATCAATATAAACGAAAAAGGAATTGGAAACAAAAGTCCGG  
AATAGCACGGTATAGCTAGCAGAATACCATCCCAAGACGGATCGGGCTTCTG**CTACCTCTTTCTTTCTCGTGG**  
**AGTCTTGTCTGCGTCTTGGTGGACAACCTGGCTTCCGTGCCTCACTCTCAAGCTCCAGCGAGTCGTCAAGC**  
**TGCTCATCGAATAACACCTGGTCTCCACTTCCACCGAGTTCCATGAACTCCTTTGAGTTCGGTTGCCAGCCGT**  
**TTGGGCTCCTGGGCTCGAGGCACAGGATGATTCTGGTATATAGTTATGTCCTGGGAAGCAGGGTCTGCTTTCCT**  
**TGGTCTTACCACCTGCTTGACCGTGACTTCATGTATGTCCTCAACAGCCTGCGGACCATAGTTGGCCGGCG**  
**TTCTTTGGACACCCTCAGGCCACCGATGGCCCCGGCTAGGTCATCGGTGCTGTCTGCCACCCTAGGCTCATCG**  
**GGTTCGATGCCAGTGATCCATGGGTGCTGGAGACACTCATCTACTTTCAAACGCTCCTTCACGTGACTTTCGA**  
**TCATGGAGTCGATAAGGTCCATGGCTCTATAATCGATTGAGTCCAGTATGGAAGAGGATACTTAAATATTCC**  
**GAGCTGGATCTGCTCTTTCTGAGTGTATGGTAGTCTCTTGGGTGGTACAGTTCATCTGAGAAAGGAGGGAAT**  
**CCGCACAGGCAGATGTAGAGTACCCTCCGAGTGACCAGATGTCAACCGCTCGGGTGTACATTCTGGCTTCAG**  
**CGTTTTCTGCCAGTATCTCAGGAGCAACATCTGATAAGAATTGTTAGATTCACATTTGGTGGATGAAAGCACC**  
**AGCGTTAACAGAGCAGCAGGGAACTTACAGCCAGGCGTTCACATCTAGATTTTATGATCTCTTAGTAAGAT**  
**TGACCCAGATTTGAACGCAGAAGGTAGGTGAACTTACAGCGTGGTGGTAAAGGAGTGTTCGCCGACAATCTT**  
**TGCAAGGCCGAAGTCTGCTAATTTTACGGTAAGATCTTTGTCGACAACCAGAATGTTCTCTGGCTTTATGTCA**  
**CGGTGAATGATGTTTCGTTTCATGCTACGACAACGGTTAGCCATATACACTGCCATGAGTCTGATCAACCAGAA**  
**AACGAACGACATAACCAGGTATCTCAAACCTTCAAAAAGCTGAATGAATACTTTTCGAGTCTCCTCCTCGCTGA**  
**GTTTCTGATGCCTAATGATCCAGTTGAACAGTTTCGCCCTCTGGCGCAAGCTCAAGAATCAGGAAGACACCATC**  
**GCTCTCGTCAAAGGTATCCTTTAGGCACAGCATGTTTCGGATGGTTGACACTCATCAGCATTGAAATCTCTTGC**  
**TGTAGTGCTTCACGGTCTAGCCTCTGAACTGCGCCCCGGGCGTTTTCTCGAAATGTTTGACGGCATACTTGATCC**  
**CCGTAGAACGTTTCAGCGCATAGATAAACCGAGGCAAAGTGTCCCCTACCCAGCATATCAAAGAGCTTATACTG**  
**CTGTCCGAACTTGCTTGTGTTCCGACTCCGCGGGTAGTTGAAGATGAATCTGGATTCTTGCAGGATGGTAATC**  
**TCGTCCGCGTTTTTCGAGCTCTCGGCGTTTTGTTCTTGGCGATGATGGCGTCGTTGATGAAAGTGCCATTGATAG**  
**AGAGATCTTCCACAATTGCAACAAAGTCTCCTCCCTGTTTTCTGTTGGAATATCAGGCAATGGCGGTTGGATATC**  
**GTGGGGAGCTTGATCCTGAAATCTGCAGTACCAGATGGTTAGCAATTGATCACTAGACGGCAGAGAGTATGC**  
**AATGGGTAAAGGCATACCGCACTCTGCATGCCGCTATAAGATATCCAGCGCGGTTTATCTCTCTAGTTCCAC**  
**GTTTTGAGGCGTTGCTTTCCGGCGTTGATATGTCTGATGCTGCTCCAATTACCGGTGTAGTATTTGTGCTGTC**  
**CCGCTTCTTCCAGAACCAATTGGCCTCCAAAATTGTTATCTAGCGGAGTAAGATATCCCCATATGCCCTGGGCC**  
**ACCTCGTCTTCCACATCGTCAATGGATTGGATTGGGGGATACTGAGAGAAACCCTGGGTGGGACATGACGACT**  
**CGTCTGGCGATTGACCTCGAGGCGCCTGGTTCGGCGGCCTTCTGGGGGAGAACTGTAGCAACTTCACGCTT**  
**TTCTTCTGAGATTACTTCATTAGCTAGGGGAGAAGGTAGATATCCGGCATCCTGCTGCAATTGAGATGAGATT**  
**CGAGGAGATCTCCGTGGCTTCTTTGATTTCATGGTCTGGAGCTGCGTTGCCCTGCAGGTTGGGAAAAGAAGTT**  
**AGCAGCTTGAATATTTTCATCCTTCTGAGAACTAATTGGATATAACGTGTTTCATATCTTACCCTTTCTCTCT**  
**TCAGATTGCTTCTCTCCCTCTGCGGAGGCAT**GTTTTGGCCGGCGTGAAGAAGTTGACGGCAGTTACGAATATC  
CCGGATGGACTGCCAATGGCTTCGCAACTTCAACTCCAAGTCGATGGCAGGCAAGATCAAGCCCCAACACT  
CTACCGTAGTTGCAAGACCGAACAGTGTGCTGTGCAAGGTGGTAGAAGCAGTTCAGCAGAGAGAGGCAGCGT

GTGAGTCTACCTGCTACCCGTA CTATGTATATCCCGACTATGAGACAGCCGCCGAGGTGTGCGGAGACGAAA  
TAAATAACTAGTTATCTTTTCGGCTCCTGAGTTCCAGGCCGGACAAGCCCAGGCCAAGCTGCAGCAAGCCCCA  
AGCAAGAGAACGACGGCGCTTAGAGTCAATTGGCAGGCCAGGCTGAGCGAACTTCCCTTGCTCGACCTTTTTT  
TTCTGTGCGAAAGATGCGAAGTCGCTCTTTATTAGCGAAGTGGGATCATCTCGTAGATGGCCTAGGTAAACAAC  
TGCATATGTACCTTCACCGAGCTTCTTATCTTTCAGAATAACCAAATGTTAGCATTATGGGGTCCCAATGGTT  
GGGTGTATTTGCCCGCCACCTTTGACATATTTCCGCCGTACATCAGCGTTTAACTGCTCCGCCAGCTCTGG  
TTCGGGCATGGAGGGCTTAGGAACTGCAGGATCACCACTAGGCGCCGTCCGAGGCTCTTGAGAAGCAATATTT  
CTCATCGCTAACGACTTTGGAGCACCGGTAGT
