# Supplementary material for: Two different types of tandem sequences mediate the overexpression of TinCYP51B in azole-resistant Trichophyton indotineae
Source: PubMed Central journal article supplement (PMC10648874; doi:10.1128/aac.00933-23), 2023-10-12
Supplement: aac.00933-23-s0002.pdf [file aac.00933-23-s0002.pdf]

**TinCYP51B locus in TIMM20122**

[Read No.m64281e\_230107\_125321/117836369/ccs] [Antisense (-) strand]

ATA~ (Upstream sequence of the 7374 block)

GGT~ATT (5'UTR)

CTA~CAT (*chkB* protein kinase genomic DNA) (Reverse sequence)

TCA~CAT (*TinCYP51B* gene) (Reverse sequence)

AGC~TTA (3'UTR)

ATG~TAG (*FYV4* genomic DNA) (Forward sequence)

CATTAGCTAGGGGAGAAGGTAGATATCCGGCATCCTGCTGCAATTGAGATGAGATTCGAGGAGATCTCCGTGG  
CTTCTTTGATTCATGGTCTGGAGCTGCGTTGCCCTGCAGGTTTGGGAAAAGAAGTTAGCAGCTTGAATATTTT  
CATCCTTCTGAGAACTAATTGGATATAACGTGTTTACATATCTTACCCTTCTCTCTTCAGATTGCTTCTCTCC  
CTCTGCGGAGGCATGTTTTGGCCGGCGTGAAGAAGTTGACGGCAGTTACGAATATCCCGGATGGACTGCCAA  
TGGCTTCGCAACTTCAACTCCAAGTCGATGGCAGGCAAGATCAAGCCCCAACACACTCTACCCTAGTTGCAAG  
ACCGAACAGTGTGCTGTGCAAGGTGGTAGAAGCAGTTTACGAGAGAGAGAGGCAGCGTGTGAGTCTACCTGCTA  
CCCCGTACTATGTATATCCCGACTATGAGACAGCCGCCGAGGTGTGCGGAGACGAAATAAATAACTAGTTATC  
TTTCGGCTCCCTGAGTTCCAGGCCGACAAGCCAGGCCAAGCTGCAGCAAGCCCCCAAGCAAGAGAACGACG  
GCGCTTAGAGTCAATGGCAGGCCAGGCTGAGCGAACTTCCCTTGCTCGACCTTTTTTTTTCTGTGAAAGATGC  
GAAGTCGCTCTTTATTAGCGAAGTGGGATCATCTCGTAGATGGCCTAGGTAACAACACTGCATATGTACCTTCA  
CCGAGCTTCTTATCTTTTCAAGAATAACCAAATGTTAGCATTATGGGGTCCCAATGGTTGGGGTGTATTTGCCCG  
CCCACCTTTGACATATTTCCGCCGTACATCAGCGTTTAACTGCTCCGCCAGCTCTGGTTCGGGCATGGAGGGC  
TTAGGAACTGCAGGATCACCCTAGGCGCCGTCCGAGGCTCTTGAGAAGCAATATTTCTCATCGCTAACGACT  
TTGGAGCACCGGTAGTAGTGATGGGAGGGAATTGAGAGGGAAGCGGCGACTGCCATAATGTCAAGCGAAAT  
TGGCTTCCACCAATTTTCGCGAGACAAAGGATAGAGTGGCACAAGAGTGGACACTGCTCTGAGCAGCTCTCCT  
AGTATTTCAATCAACAATACAGCTTTGTTTGTATCAAAAATATATATCGTCGTCTTTCATCTTTGAATGTTGCG  
ATGGAAGCTTCGGCTGGCCCGAGCTCACCAGGATCGGCGTTTTGTTGATCCGAGCTAAGGCCGTCGGACCTA  
ATTCAAAATTTTGGTGCAAAATCTTGAACGAAGTGAAGAACCAGTTGAACATCTTCTATACAGCGCCATTGA  
GCATTGGATTGACTCGCCTTGAGTCCCTTACCGGTTTACCTGGGCCCTTGGTGCCGTGGCTTTTTTTCGCTTTC  
GTCACGCCC GCCGATGGTGTCTTACACCAGAGCTAAATTAATCTTACCCCCAGATCTCGACATTGAA  
CGTTTTGATATAAGGCGATATAACCAC**TATG**GCTGCGGCGGCATACCGGGCTTTAATGCCAGAACATCCCTT  
CCACTACGGCTCTTCACTTCCGTACAAAACCCCATTTATCAGCCATGCGTACGGTACCTTCATCAATCTCGAA  
AACCCGCAACAGTGCCATCACCTACCCCATTCGTGCCCGATGTGAAACATTCCTACGCCTAATTGGGCGAAA  
CATGTCCAGATATTTCCAGCAAAATCACCGGATGGAAGCAATTGTTTACAGCGGACTCGGCTGAGCTTCGAGAA  
TTGGGCATAGAAATGACAAGGGACAGACGATACATACTGCGGTGGAGAGAGAAATTCAGACAGCAGGACTACG  
GCCAGGAGGTGATTTGAAAACGTTGTTGACGGTGTGCTGAGCTGAGAGCTGTTGAGGTCCCCGTCGAAAA  
GTCAAAGAGTGCAAAAACCTACCAATGCCACCGACGGAGAGTCCCTAGATGTTAGCACAAATGGGCACCGCTACC  
CTTACACCTGGAATGCGTTATGCGATTGTCAATCTACCACCGGCCGAAACAGAGCTCAAGGATACTTCCAAGC  
CACTCAAAAAGTTTGCCATTATAAATTGCACCACGGGAATATGATCAAGGGGCCGTATGCTCAGATTATTC

AAACACATGGAGTACCGCCGTCAAGGTTTCAGGTTACTGATGGCATGTGGGAGCATAAAGCGTGGCAGAAAGATT  
GACGGTGGTCAGAGAAGACAGAAGGAGATCAGAGCGAAGAGAGCGTTGGCGGAGAGGAGGAATGCTCAGGCAG  
CTGCT**TAG**GCGTTTTGTAGCGTCGGAGTTGAAAGGGGGCACGGGATTAACGACGTTGCTGGCTGGTTACTTCC  
TGACATTACTGGCTTGGATATCGCTGTTTGTAGTGTAGATTATCCCAGCTACGGGAAGATGTACTATTTCCAA  
TGTATATTACCATTTTGTCTGCACCAAAGCTAACGGAGTAAGTCAACTTTCTGTTTATCTAGAGTATTG  
TAATAAATGGCTGTATTAGAATAATACTATTATCTACATCCCCATCTTCAAAGCATGGTCAAAGAAAGTT  
TTTATTACATATGCTCTATTCCGAAAACCTATTTGCGTGACCATAAAGTGCAAATATGGCTCGGTGTATAAAC  
GTAAGAAAAGAGAAGAAATAAATTAGCAAGAAGCAAGAAATTTAACATGATTCAATCCGCAGTCGTGATTA**TC**  
**A**TTTCTGGGAAGGCTGCTTTTCGCTTCTCCCACGAGACCATTGGGTGCGCAAGGGGCTTCGAGAAGAGGGACTA  
TTAATGCAAAGTTAGTAAAATCGAGCAAAAATAAAAAGGAGCGTAATATGCCAACTTACCGAATAGTCAGTTG  
GCGGCACAACATCTTTGGTGCCTTCAACTTGCTTCCATTTCATTAGTCTGGCTAACGTAGCTGTTACGGTTCC  
AAGCTGAACATATGCAAATTGTTACCGATGCATCTGTGTCTGCCTGAGCCGAATGGGAGGTAAGGGCTGTTG  
GCACCCTTGCTAACCAAACCGTATCCGTAATCTGTCTTTTCTTCACTGGCCTCGACTACGGTGACACCGACGT  
TGTTCTCCCATCGGTGAGGGTTCCAAACAAGAGGGTCAGGGAAGTACTGAGGGTCTCGTGAGGGAACACCAGG  
AGCGGCAAGGAGGTTGTGAGAGGTTGGGACAACATAGTTAGTTCCCTTCAACGGGCATAGGGGATTTAACAGCA  
CGGAGGATAGAGTGGATGGGAGCGTGGAGGCGGAGAGTCTCCTTGATTACATTGTTGTGAAGATCAAGTTTCT  
GGAGAGATTTCGTAGGTGAGTGGTGAAGATCCTCGCCGAGAACACGTTTCTGTTTCTCGTAGAGTTCCTCGAG  
AATATCTGGACGGCTGGCAAGGCGGAGAACGATCCAGGAGCCGGTGGAGGAAGAAGAGTGCTGGCCAGCCATA  
AGAAGAGCAATCATCATGTGGGCGACTTCGATATCTGGAATTGGCGTTCCATTCTTGTACACGGACGACATCA  
AGTTCCATACCATGTCCTCGGAGTCTTTCTCTCCACCAGCCTCACGTGCTGACGGATGATGTCGGTGTAAC  
CTGGGCCATCTTCTTTTGAGCACGGTCACGCTTGCGGTGTGTGGGAAGGGGAACCATGGGAACATGAAGTTG  
ATGGCGGCGAAGCCCATGTCGAGATCGGAGTAGAGTTCGCAAAGCTGGAATCGAACTTTCCTCGCACCTCCT  
TGCCCTGTAGAGATCGAGAGGCGGTGTAGATGGTGATTTTACGCCATGACCTTGCTGACGTTGAAAACCTCCGGA  
GTCGCCCTTGAAGACGGGGGAGGACTCGAAGAAGTGTCAACTTTCCTTGGTGATCAGGGTGACATAGGATCGG  
AGAGCTTACAGAGGTGAGGCCGAACCTTGACGAAGTGGTAGACGATTAATAATAGCAATGGAGGCCAGGAGATGT  
AGACGGGAATAAATTGCTGTACACACCTTCTTCTGCTCCATGAGCTTGGAGTTTGGGCAATCATAACCCACAT  
GTCGTCCGAACACTGGGGTGGTGAGGGGGGAGTAGACATCCTCCGCGCAAACATCCTTGAGCTTGCCGTTCAA  
AATGAAATCATTTCCCTTTGTACCGAGAAAAACAGTCGTCTTCTTGCCAGCAGTATGAATGTGAAGATGTCT  
CCATACTAGAGTACCGAAATTATTTATACGTTAGCTTTGCGCAACCTGGTATATAGCTAAGTTGAATTGCACC  
AACTAACCTTCTCCTTGCAGTCGTCAAAGAAGTGTACGGGTCAATTCCATAGGAGATCGTGCTTCCAATGAC  
CGGAACCCAGTGGAAGACCACCGGAGGCTTTGTAGGGTCTTGAACAGGAGCTGCTGCAGGACGTTGATAACA  
ATGGAGAGGACGATAAAAGCCGATACGGCACTTGCAGACGAGCGCGGGTGGACAGGGTTCGAGCAGTTCTCGC  
AGAAACGAGAGACAATGTGGCTAAGAGGCC**CAT**GGTGATCGTCTTATCCTCCTGCTTCCGCTCAAGACTTGT  
TCGTTGTTTGTGATGAATGCCTTGAAGCTGCTGCGGACGAAGCAAGGGAAAAAAAAGTTGCATCTTGAGATC  
GAACTCGCATTTTATGCAAGGGGCGTACGGTACTGTAAGATAATGCATTGTTTCTGGTATTTTACGTCGTTTT  
TTATTGGTTTTACAGCTGCATCTCCAATACCAAATTACCGCTGCCCTTCTGCCCCCTTTTTCTCCCTTGC GG  
CGAGCAGGCCAACGGCCGTCGAGATGATTACAATTCGAGCTCGCGACGGGGCGGAGACGGTCCCTGGACGGTG  
TTCGTGCAGGGCGTCATCTCCTCCGCTGGATTCTCTGCTGCCTGAGCGAGCGAGACCTGACGGTGGGCGCATC

ATCAGGCCATCGCGGCTTCAGGGAGGCCGGCTTAGTCATGGCAGGTTAAGCTATCAACGGTCCGTCAATATTA  
ATATTGTTATTATTGTCCGGTGGTGTAGTGAGAAGAGACTGTAATTACATTGCCAGTGGACGCTATTGTACCC  
ATAGTTATATCACTCAAAAATGAAATCCTAAACACGAGAATCGCCGTCGTCTCCAAGGCAGCGACCAAGCCGG  
TTTTTCTGCTGCTTTTTCGGTTAGTTGGCCCCCTATCACCTTTCAACCGGGGGGTATAGTTAAAGAAAAAATTA  
AGAAAGATCACAAATCAATATAAACGAAAAAGGAATTGGAAACAAAAGTCCGGAATAGCACGGTATAGCTAGCA  
GAATACCATCCCAAGACGGATCGGGCTTCTG**CTACCTCTTTCTTTCTCGTGGAGTCTTGTCTGCGTCTGCTTTG**  
**GTGGACAACCTGGCTTCCGTGCCTCACTCTCAAGCTCCAGCGAGTCGTGACTGCTCATCGAATAACACCTGG**  
**TCTCCACTTCCACCGAGTTCATGAACTCCTTTGAGTTCGGTTGCCAGCCGGTTTGGGCTCCTGGGCTCGAG**  
**GCACAGGATGATTCTGGTATATAGTTATGTCTGGGAAGCAGGGTCGTCTTCCCTTGGTCTTACCACCTGCTT**  
**GACCGTGACTTCATGTATGTCACCTCAACAGCCTGCGGACCATAGTTGGCCGGCGTTCTTTGGACACCCCTCAGG**  
**CCACCGATGGCCCCGGCTAGGTCATCGGTGCTGTCTGCCACCCTAGGCTCATCGGGGTCGATGCCAGTGATCC**  
**ATGGGTGCTGGAGACACTCATCTACTTTCAAACGCTCCTTCACGTCGACTTCGATCATGGAGTCGATAAGGTC**  
**CATGGCTCTATAATCGATTGAGTCCCAGTATGGAAGAGGATACTTAAATATTCCGAGCTGGATCTGCTCTTTC**  
**TGAGTGTATGGGTAGTCTCTTGGGTGGTACAGTTCATCTGAGAAAGGAGGGAATCCGCACAGGCAGATGTAGA**  
**GTACCACTCCGAGTGACCAGATGTCAACCGCTCGGGTGTACATTCTGGCTTCAGCGTTTTCTGCCAGTATCTC**  
**AGGAGCAACATCTGATAAGAAATTGTTAGATTCACATTTGGTGGATGAAAGCACCAGCGTTAACAGAGCAGCAG**  
**GGAAACTTACAGCCAGGCGTTCACATCTAGATTTTATGATCTCTTAGTAAGATTGACCCAGATTTGAACGG**  
**CAGAAGGTAGGTGAACTTACAGCGTGGTGGTAAAGGAGTGTTGCGCCGACAATCTTTGCAAGGCCGAAGTCTGC**  
**TAATTTTACGGTAAGATCTTTGTGCAACAACAGAATGTTCTCTGGCTTTATGTACGGTGAATGATGTTTCGT**  
**TCATGCTACGACAACGGTTAGCCATATACACTGCCATGAGTCTGATCAACCAGAAAACGAACGACATACCAGG**  
**TATCTCAAACCTTCAAAAAGCTGAATGAATACTTTTCGAGTCTCCTCCTCGCTGAGTTTTCTGATGCCTAATGA**  
**TCCAGTTGAACAGTTCGCCCTCTGGCGCAAGCTCAAGAATCAGGAAGACACCATCGCTCTCGTCAAAGGTATC**  
**CTTTAGGCACAGCATGTTCCGGATGGTTGACACTCATCAGCATTGAAATCTCTTGCTGTAGTGCTTACGGTCT**  
**AGCCTCTGAACTGCGCCCGGGCGTTTTCTCGAAATGTTTGACGGCATACTTGATCCCCGTAGAACGTTTACGCGC**  
**ATAGATAAACCGAGGCAAAGTGTTCCCCTACCCAGCATATCAAAGAGCTTATACTGCTGTGCGAACTTGCTTGT**  
**GTTCCGACTCCGCGGGTAGTTGAAGATGAATCTGGATTCTTGCAGGATGGTAATCTCGTCGCCGTTTTTCGAGC**  
**TCTCGGCGTTTTGTTCTTGCCGATGATGGCGTCGTTGATGAAAGTGCCATTGATAGAGAGATCTTCCACAATTG**  
**CAACAAAGTCTCCTCCCCTGTTTTCTGTTGGAATATCAGGCAATGGCGGTTGGATATCGTGGGGAGCTTGATCCT**  
**GAAATCTGCAGTACCCAGATGGTTAGCAATTGATCACTAGACGGCAGAGAGTATGCAATGGGTAAAGGCATAC**  
**CGCACTCTGCATGCCGGCCTATAAGATATCCAGCGCGGTTTATCTCTCTAGTTCCACGTTTTGAGGCGTTGCT**  
**TTCCGGCGTTGATATGTCTGATGCTGCTCCAATTACCGGTGTAGTATTTGTGCTGTCCCCTTCTTCAGAACC**  
**AATTGGCCTCCAAAATTGTTATCTAGCGGAGTAAGATATCCCCATATGCCCTGGGCCACCTCGTCTTCCACAT**  
**CGTCAATGGATTGGATTGGGGGATACTGAGAGAAACCCTGGGTGGGACATGACGACTCGTCTGGCGATTGACC**  
**TCGAGGCGCCTGGTTTTCGGCGGCCTTCTGGGGGAGAACTGTAGCAACTTCACGCTTTTCTTCTGAGATTACT**  
**TCATTAGCTAGGGGAGAAGGTAGATATCCGGCATCCTGCTGCAATTGAGATGAGATTCGAGGAGATCTCCGTG**  
**GCTTCTTTGATTCATGGTCTGGAGCTGCGTTGCCCTGCAGGTTTGGGAAAAGAAGTTAGCAGCTTGAATATTT**  
**TCATCCTTCTGAGAACTAATTGGATATAACGTGTTTCATATCTTACCCTTTCTCTCTTCAGATTGCTTCTCTC**  
**CCTCTGCGGAGG**CA**TGTTTTGGCCCGGCGTGAAGAAGTTGACGGCAGTTACGAATATCCCGGATGGACTGCCA**

ATGGCTTCGCAACTTCAACTCCAAGTCGATGGCAGGCAAGATCAAGCCCCAACACACTCTACCGTAGTTGCAA  
GACCGAACAGTGTGCTGTGCGAAGGTGGTAGAAGCAGTTCAGCAGAGAGAGGGCAGCGTGTGAGTCTACCTGCT  
ACCCCGTACTATGTATATCCCGACTATGAGACAGCCGCCGAGGTGTGCGGAGACGAAATAAATAACTAGTTAT  
CTTTCGGCTCCCTGAGTTCCAGGCCGGACAAGCCCAGGCCAAGCTGCAGCAAGCCCCAAGCAAGAGAACGAC  
GGCGCTTAGAGTCAATGGCAGGCCAGGCTGAGCGAACTTCCCTTGCTCGACCTTTTTTTTTCTGTGCGAAAGATG  
CGAAGTCGCTCTTTATATAAGGTTGGCCGCCCGTTAGAGCCGCATCCCGCAGTTTCTTATTATTTTTTGCCTT  
CGTCACTTTGTGTTATTTCAACTCCTGCTTGGATGCAAAATATCCAGCTATCTTGTAAGCAATTTCCGTATCA  
TAGCCTAAGGCACAAAAGTCGATCATCGAGTTTTTCTCGCGCAGACTGTTTTTCAATGCCTGGCTTGCATGTA  
GCGGGCTCAACCCCCCGGAGACAGAGACAGGCCCGGAGGGCGCAAGAGAAAAACCCTGTAGAGGAAGAGTGGC  
TTGTCCAGAGTAATTCACAAGTTGGCAACCCTGGCTGCGTCCGTATCGAGTGTATCAAAATGCCCTTTCATG  
CATCTCTCTCGCTTTGCCGTCTTGCTGCCAGTCGTTTTCTGCCCCGGCGTCACTAAACGGGCCTCGGCTTG  
GCGGGTTGATCCTACCAGCGACTCGCATCTCCAGCAGGCAGAGCACTTCTGATACACTCCTGACCACGCCCC  
AAAACACACGACTGCACGTTTCGGTGCATCCCCACCCCTTGAACACGAAAAAGAAAGCCTCCTGGATGACG  
GCGAGGCTGGTTGACCGGATATGTAGGTGTTCTCGCCCTGTGTTGGTGCTACGTTGGGCGCAGACATTTGCTA  
ACTAACCGCCGGGGGAGAGCTTCAGGCATCATTACCATCGTATATCCGGCGTGCGGCGCTCGAGAACTTGC  
GATACTAGCCACAAAACACCCCGGCAGGACGATGATCAGGGCAATTCAGACGTCGAGAGGCTCATAAGTGCC  
TGCAATGGCTCCAAGGCGGCTTCCAGTGGCTCCAGGCTCGCTGCGCCTCGAGTGTACTGCCCCCCCTTTT  
ACTGCCTCAATACATACACACACCCCTCCTTCAATGGCATATGCGCGAGAAAGTGGCTAATGAGGAAGATAGG  
GGGTTTCGAGAACTAGACGTACTGCTTGCTGTGCAAGGCAGCTGGCTCTGTTACAGCTGGTGACCATGCTGC  
AAAGCTGGTTTTCTCTACTGGTCGGATACCTGCTTACGCTCCATACGCTCCGCATCCATTGCTCTCCTTTCCTA  
CATATTTACAAACCCTCGCCGTGGGAGACCTTGACCCATGATGTGGTTACGGCGTTGCTTTCCTGCTGCTA  
GGCACAAGTCGCTGCAGGATGACGTCCACGAAGCCATTGACGAGTACTTGGAGAATTGTCACCAGGCAACAGA  
CCGCCTGCCGGCCGTTTTTGTATGCAGATGGGACAGGGATACAGGTTCGAGAGCCATGAATCTACGGATGTGACT  
ACTCTAATGGTATCGCTAGTGGGATTTCTCCGGGCCTCGTCCGAATTCCCCCATTTTTGGGCACCGCTGGATC  
GCCTTGCTATTGTAAAGCAGTTACACATCATTCTATCAGAGCGGTTCCCTGGTAGCTGTGGAGACCATCTCTTC  
CGGCATACGGAACTCTCGCTCTCCAGATCCTCTGCTGCACGACTGGAGACGGTACACCCGCCAGTATGCGGCT  
GACGGACGACCCCTTGGCTCCATGTTGCTACAACAGGCTTTCATGGGCTTCTAAAGTCTGCACATCTCCTG  
TTGAAAATGATCAAACCCACCGCTGCCAGATGATACCCTTCTCTCCCGATATGCAGACAGTGGTTATGTAGC  
TAAAGCCTCAGACCGCGGGATGATTAGCCTGGTAAAATACGCCGAGAAATCGCGGGTGACCAGATCAATCTC  
CTCGAAGAAGAGTCGGATTACCTACAAGTCAGCTCCACTTGGCAACAACGCCTTGCATTCTTGGTCAAGGCTT  
TGTCGATAATGTGCTCGATCAACTGCATCATGGTTGACCAGGATTCAGTGGATCTAGACCTGCTCTTCACATC  
CCTGGACAATACCATTTTCAGATCCAGACCAAATGATGAACAAGGACCTAGCTACCGTTGTCCTTAAGGCTGCT  
GTCATTCTAGCAAGGCTATCCCGAGGCAGTGCAAACGGCCTAACCCGCTCTCTTCTTCGCTTCATTGTCCAAA  
ATGGCCAAAGCAGTCCTGTGTCGCACTGGCTGCCCAATGTTTGGCCCAGAACCTCCGGCTTCTTTCCCAAGA  
TACCGTCATAGGCACCCTATATTTCTCTCGGAAACGTCCTTAGCTCCGGATCGGCAGCTGATAAGGCTGCCACC  
GCTCTAACTGCCGAGTCAGGCACTGGCTATTTCTCATTCGATAGAGAACCGTGTCTCCCCCACGAATGAGAGCT  
TCTTATCCCTTGCTATTGATGGGGAGGGGGATACTTCCGTCACAGCTAGAAATGTGGTACATGCCATTGTAAC  
AATCGCCACTTATAGTGAAGATAGCAAGATCGTTGCCCTTGCACAGTCCATTCTGGTGCAGAAGATTGGCAAG

GCGAATGTCATAGTTGATGCATACATTATCCAGGAGACTGCGGCTCTTTCGCTGAAGAGTGAGCCTGCGGAGT  
TCCGTCTCTTGCTAAAGTTCTATTCTCGTCTACTGCGAGATACTGTTGCTCAGGGGAATAACCTCATGCTGGA  
GGCGGTATGTAGTCCAAGCCCCCTTTCATCTAGCTGTTTCGACCTTGTTCAGTGGGAATTCTAACGTATACATA  
GATACACAAAGCAAGAAATTACCTTGCAGCCAACCTCGACCGAAACAGTGAAGTCTTCAAGATTTATCTTGTG  
TTCCCTCCTCGAGAGCTTAGTTAACCAGGGAGCTGCGGTGCAACGCGAAAAGGTTTCATCCAGAGGATCTTGAGG  
CAACTGCTAAACAAATTGCCCAATATTGAAACCTCTTGCTATACTACTAGCCCGGGCAGGCCGCTTAGATCA  
ATTAGCCTCTGGGGTGTGTGACGATGATGATATCACAGATATGCTCCGGGATGCGTGGTTCAACATCGCAGCC  
CATGATATATCACTTCACTCAGAGCTTGGAAAGGCGAACTACGAACAACACTACGTATCCTCGCCGAACATTCTC  
CTCCGCTAGTCTCCGAGAACCGTGCTGAACTGCTCGAGAGTGACATTGAATTAATAACAATTCTAAGACGCGG  
CCAGAGCCCTCAGACAACCGTTGAAAAGAAAAAGAACCTGACTGCTGAACTGCCGGCACAAGAACATGATATC  
CGACGCCTGAACTACCCCAAGGCGCTCTTTCTCAATGCAACGCTACTCATAGAAACCTCCGTGCCAATTCTG  
GTGATTGCACCAAAGTGTTCACATACTTCCCTCGACCAACCTTGGGTGCCCTCGGAAATGGGCAATTGCATGAG  
AGCAATTGCGGACAAGGTTGTGACCGTCTACCTTGAGAAAACCTCCGAAGCACATCCGTGAAATTCTCGGCC  
CCTTATATTGCCAAACAGCTAGCTGATACTTTCCTGCTTGTGCCATCGTATCATCCAAGTCCAACAACTG  
CTACTCTAGCTGCAAATAAGATAATCATGCAATGCCCGTCAGCACTTTGCCAGAACTCTCGTTGTTTACTCT  
GCTTGATTTGATTACTTTGCTCTGGTCATCGTGCATGGACGAGGAAATGGATGAGTTTGCATGGAACCTCTACT  
TTCACATCGAGCAGGCGGACGGTCCAGGTTGTTTTATCAGACAATTATGATTTTCAGGAGACGTACCTTGAAGA  
ATCTCCATAACTCAGCGCGCACTTGGATCTCAAATGTTATGAACATCGCACCATTAGATATCAAGGGGCTACT  
GCAGGTGAGTTATTATTCCACCGATGCCATCAACTTCACTAATATATGTTCTTTTCATAGACGTACCTTTCTG  
ATTACGATGATGATGGCGTGTACGGCAATATAAACATGGGCCGTTTCGTTAGCACTTGAAGATGGGCTCAGCAAT  
CCCTTTTGCCGACCAGCGACTAGGTATATCAGTTCTTATATCAATAATTTATGCTCTGAGCTTTTCATTAACAG  
CTGATAGGATCAATTGATAACCCAGGTGGCACTGTTCTCAATGTTGCTTCCGACTTCATTTCTCAGTATACCA  
CTCGACAAGAGTACCGGTACTCTGAAGCCGCCCCAGCTCGCAGAGGAAAGTCTCCTCTAGCGATATCCTATGG  
TATTTATATGTCTGATTTGAGCCATTGAACCAACCTTCTAATATCTTCAATAGGTCAAAGCACCACCGCCCGG  
GTGACTGATTACCCTGACACTGTACAAGAAGCTCTCGCAGCTCTCGAGCATCAAATTAGAACAGAGAAGCATA  
TCTCGCTGGATCTTCCCTCGGCATATTCTCCGCCGCACTGCTGCTCTCTTGTGTAATACTGATGATAGCCATCC  
GGCAATTATTGCTTACCTAGTCAGCATTCCCTTCCAGATATTTACCAAGGAGTCCATCAGGATGGGAATTGCT  
CTGTGGCTAGGAGTTATCAATGAAAACCAGCTATGGAATCCAGAATATTGGTAGAAGTAGCGCAGGCATGGG  
AACGTACCATTTCGTCGAAGCAAGGAATCTTCGATCCGAACCTCAAGTAAGCTATCTTCTCTCAGTTTCCTTG  
CATCCTGCCCTGACTAACTAACGTTTTTTTAGACATAAAAAATCCCTTTATGAACAAGCTTGAATCATCCCCATC  
CGATAAGGAAGCGATTGTCCGGCGTCATAAGAAAGCCCAAAACATCATATCTCCTCATTCTTGGTTTTGCAG  
TTCCCTAGAAAGCCATTTTCAGCGCAAGTAGGCTAGGCAGCTTAAATACGCAACAGGTATTTAGACGCCTGGTCA  
GTGAGACGTTGGCGGCCTTGAGGGATTCTACTGGCCACCCGCTAGCTCGCGAGATTCACCTCCATATCATCCT  
TTTCAGTCTCAAGGTGCTCCATTCTCCTCCGGACAGAGTAATGTTGGTTCGTGGAAGCTCAAAGATCAAATT  
CTCTCTGCTGCACTGAGCTGGTTCAACCACTCGCCAAGGTACGTTATCATTTTAATCTCACTTCCCTAGGAAGA  
TAGCTAACCAAGCATTTTTTTAGGTGGTTCGTTTGGAGGGAAATCGCTTGCAGCTCAAAGCTGAAGATCAGGTCCT  
CCACGATATTGAATCTATGTTGGAGACCTTGTCTTGGAAAGAGGTAGTGGACTCAAAGTCTCATAAATCACTA  
CAAGCAAAGCACGATCTACTCCTCATTCTGATTGGAATGAACGCTCTCGACTCAAAGTCTGGCTTTCTCCAC

TAGACCTAGAAAAGAAATCGTACTTCTTCTATGGAAGTGGTAACAAAACCGTCACCGAGGTACGTTCCCTTACA  
TCACTGTTTTCGGGCCAACCAGTGGCTAATTATATGCTTTAGGAGACCGTTGCGGGACTTCTTCGATTGGCATG  
GAATGAAAACCCAAGCCTAGCACTCCAGCTAGGATCACGGTTCCCATCTGCTAAACTGCGAACTGATATCCGA  
TGGCTTCTACTTAACTTCCCGGAAAAAGCACTTAAGGAGCCAAATGCTTTGGAAATTCTACTTGGGTCAGCTC  
TTCCAGAGGACGTTTCATTCCAGCTCAAGGTAAGTTTTCGCGTTTTTACCCCAGGTGTGTCTTCACTCTCCTAA  
CGGCAATGCAGTACCTCCTCTATTGGGAGCCGATCGATCCGATCTCAGCCGTAACCTTATCTGTTACCAGCATA  
TGGTAACCATCCGTTTCATTGCAATATGCCCTTCGATCTCTCGAGAGCTTCCCCGTGGATGTTGGCCTTTTC  
TATGTTCCGCAGCTCGTGCAGGCCCTTCGCTATGATGCAGTGGGATATATAGAACGTTACCTTTCAAATACAG  
CTCAGCTGTACAGATGTTTTGCCACCAAGTCATCTGGAATATGAAGGCAAACGCCTACAAGGACGAAGACTC  
TCAGATTGTAAGTACCTTGATTAGTGTATGGATATCCAAATGTCATGCTAACGAGAAAATAGCCTGATCCAC  
TTAAACCGGTGCTGGACCGATTCATGGACTCTGTTATTGCAAGCTTCACGGACGAAGACAAAGAATTCTATGA  
GAGGGAATTTCGCTTCTTCAACGAGATCACCGGTATTTTCGGGCAAACCTACGGCCATACATTAACGCACCAA  
CAAGAGAAGAAGGAGAAGATTACGGAGGAGCTGCGAAAGATTAAGGTTGAGGTTGGCGTGTACCTGCCAAGTA  
ACCCAGATGGGGTTGTTGTTGGCATCGATCGAAAGTCCGGAAAGCCCTTGCAGAGTCACGCAAAGGCACCTTA  
TATGGCAACGTTCCGAATCAAGAAGACGAGGAATATTGAAGACGGCAGCAACGCCGTTACTCCTGCCGAAGAG  
GCTAGCCATGAGGAAGCGAATTTGCAGCTGTCCCAAGTTAAGGAATCCGCCGTACAAAGCAAACGCGAGAGCC  
TAGCTGCGTCTCAAGCGGGACATATGAGGTATGGCAGTCTGCTATCTTCAAGGTCGGAGATGACTGCCGTCA  
AGATGTCCTCGCACTTCAAATGATTGCTGCATTCCGCGAAATATTTGCGAGCGTTGGATTAGACGTATTTGTC  
TTCCCGTACCGTGTGTGGCCACCGCCCCTGGATGCGGCGTGATCGATGTCTTACCCAACCTCGATATCTCGAG  
ACATGCTGGGCCGTGAAGCTGTCAACGGCCTGTACGACTACTTCGTATCGAAGTACGGAGGAGAGCAGTCGAT  
CAAATTTCAAAGAAGCCCGAAGCAACTTCGTGAAGAGTATGGCTGCTTATTCAGTCATTTTCATACCTGCTGCAG  
TTCAAAGACCGACATAACGGCAACATCATGATTGATGACGCAGGACATATCATCCACATTGACTTTGGATTCT  
GTTTCGATATTGCGCCTGGTGGTGTACGGTTCGAGCGTGCTCCGTTCAAACCTGACCACGGAGATGATTGCTGT  
CATGGGAGGATACCATCCGTCTTCGTCAACTGCTGCCTCAGCCACAGCTTCTACAGCTACTACATCCACCACT  
CATTCGGCATCGTACAACAACCTCTCAATCCTACCGTTGGTTGCAATCACTTGTGGTTAAAGCTTTCCCTTGCTT  
CGAGACCTTATACTATGAAGCTTTCAAACATCGTAACCCTCATGCTGGACAGCGGTCTTCCTTGCTTCACACC  
CCATACGCTGACCAACTTCCGCGACCGATTTGTCTTAGAGAAGAGTGAACAAGAGGCAGCGCAGTATATGAGA  
GAACTCATCAGGAAGAGTTACGCCAGCATGTCGACCAAGGGCTATGATCAGTTCCAACCTCATGACGAACAACA  
TCC

[Read No.m64281e\_230107\_125321/106759815/ccs] [Sense (+) strand]

AAT~ACC (5'UTR)

ATG~TAG (*chkB* protein kinase genomic DNA) (Forward sequence)

ATG~TGA (*TinCYP51B* gene) (Forward sequence)

TAA~GCT (3'UTR)

CTA~CAT (*FYV4* genomic DNA) (Reverse sequence)

TTAATATTGACGGACCGTTGATAGCTTAACCTGCCATGACTAAGCCGGCCTCCCTGAAGCCGCGATGGCCTGA  
TGATGCGCCCACCGTCAGGTCTCGCTCGCTCAGGCAGCAGAGAATCCAGCGGAGGAGATGACGCCCTGCACGA  
ACACCGTCCAGGACCGTCTCCGCCCCGTCGCGAGCTCGAATTGTAATCATCTCGACGGCCGTTGGCCTGCTC  
GCCGCAAGGGAGAAAAAGGGGGGCAGAAGGGCAGCGGTAATTTTGGTATTGGAGATGCAGCTGTAAACCAATA  
AAAAACGACGTAAAATACCAGGAACAATGCATTATCTTACGTACCGTACGCCCTTGCATAAAATGCGAGTT  
CGATCTCAAGATGCAACTTTTTTTTTTCCCTTGCTTCGTCCGCGAGCAGCTTCAAGGCATTCATCACAACAACG  
AACAAAGTCTTGAGCGGAAGCAGGAGGATAAGACGATCACCAATGGGCCTCTTAGCCGACATTGTCTCTCGTTTC  
TGCGAGAACTGCTCGACCCTGTCCACCGCCGCGCTCGTCGCAAGTGCCGTATCGGCTTTTATCGTCCTCTCCA  
TTGTTATCAACGTCCTGCAGCAGCTCCTGTTCAAGGACCCTACAAAGCCTCCGGTGGTCTTCCACTGGGTTC  
GGTCATTGGAAGCACGATCTCCTATGGAATTGACCCGTACAAGTTCTTTGACGACTGCAAGGAGAAGGTTAGT  
TGGTGCAATTCAACTTAGCTATATAACCAGGTTGCGCAAAGCTAACGTATAAATAAATTCGGTACTCTAGTATG  
GAGACATCTTACATTCATACTGCTGGGCAAGAAGACGACTGTTTTTCTCGGTACAAAGGGAAATGATTTTCA  
TTTGAACGGCAAGCTCAAGGATGTTTTCGCGGAGGATGTCTACTCCCCCCTCACCACCCAGTGTTCGGACG  
ACATGTGGTGTATGATTGCCCAAACCTCCAAGCTCATGGAGCAGAAGAAGGTGTGTACAGCAATTTATTCCCGT  
CTACATCTCCTGGGCCTCCATTGCTAATTTAATCGTCTACCAGTTTCGTCAAGTTTCGGCCTCACCTCTGAAGCT  
CTCCGATCCTATGTCACCCTGATCACCAAGGAAGTTGAGCAGTTCTTCGAGTCCTCCCCCGTCTTCAAGGGCG  
ACTCCGGAGTTTTCAACGTCAGCAAGGTCATGGCTGAAATCACCATCTACACCGCCTCTCGATCTCTACAGGG  
CAAGGAGGTGCGAGGAAAGTTCGATTCCAGCTTTGCGGAACTCTACTCCGATCTCGACATGGGCTTCGCCGCC  
ATCAACTTCATGTTCCCATGGTTCCCCTTCCCACACAACCGCAAGCGTGACCGTGCTCAAAGAAGATGGCCC  
AGGTTTACACCGACATCATCCGTCAGCGACGTGAGGCTGGTGGAGAGAAAGACTCCGAGGACATGGTATGGAA  
CTTGATGTTCGTCCGTGTACAAGAATGGAACGCCAATTCAGATATCGAAAGTCGCCACATGATGATTGCTCT  
TCTTATGGCTGGCCAGCACTCTTCTTCTCCACCGGCTCCTGGATCGTTCTCCGCCTTGCCAGCCGTCAGAT  
ATTCTCGAGGAACTCTACGAGGAACAGAAACGTGTTCTCGGCGAGGATCTTCCACCCTCACCTACGAATCTC  
TCCAGAACTTGATCTTACAACAATGTAATCAAGGAGACTCTCCGCCTCCACGCTCCCATCCACTCTATCCT  
CCGTGCTGTTAAATCCCCTATGCCCGTTGAAGGAACTAACTATGTTGTCCCAACCTCTCACAACCTCCTTGCC  
GCTCCTGGTGTTCCTCACGAGACCCTCAGTACTTCCCTGACCCTCTTGTGTTGGAACCTCACCGATGGGAGA  
ACAACGTCGGTGTACCCTAGTCGAGGCCAGTGAAGAAAAGACAGATTACGGATACGGTTTGGTTAGCAAGGG  
TGCCAACAGCCCTTACCTCCCATTCCGGCTCAGGCAGACACAGATGCATCGGTGAACAATTTGCATATGTTTCA  
CTTGGAACCGTAACAGCTACGTTAGCCAGACTAATGAAATGGAAGCAAGTTGAAGGCACCAAAGATGTTGTGC  
CGCCAACGACTATTCGGTAAGTTTGGCATATTACGCTCCTTTTTATTTTGCTCGATTTTACTAACTTTGCAT  
TAATAGTCCCTCTTCTCGAAGCCCCTTGGCGACCCAATGGTCTCGTGGGAGAAGCGAAAGCAGCCTTCCCAGA  
AATGA TAATCACGACTGCGGATTGAATCATGTTAAATTTCTTGCTTCTTGCTAATTTATTTCTTCTTTTTCT  
TACGTTTATACACCGAGCCATATTTGCACTTTATGGTACGCAATAGGTTTTCGGAATAGAGCATATGTAAT  
AAAACTTTCTTTGACCATGCTTTTGAAGATGGGGATGTAGATAATAGTATTATTCTAATACAGCCATTTA  
TTACAATACTCTAGATGAACAGGAAAGTTGCAGTTACTCCGTTAGCTTTGGTGCAGAAACAAAATGGTAATAT  
ACATTGGAATAGTACATCTTCCCGTAGCTGGGATAATCTAGCATCTAAACAGCGATATCCAAGCCAGTAATG  
TCAGGAAGTAACCAGCCAGCAACGTCGTTAATCCCCTGCCCCCTTTCAACTCCGACGCTACAAAACGCCTAA  
GCAGCTGCCTGAGCATTCTCCTCTCCGCCAACGCTCTCTTCGCTCTGATCTCCTTCTGTCTTCTCTGACCAC

CGTCAATCTTTCTGCCACGCTTATGCTCCCACATGCCATCAGTAACCTGAACCTTGACGGCGGTACTCCATGT  
GTTTGAATAATCTGAGCATACGGCCCCTTGATCATATTCCCGTGGTGCAATTTATAATGGGCAAACCTTTTTG  
AGTGGCTTGGAAGTATCCTTGAGCTCTGTTTCGCCTGGTGGTAGATTGACAATCGCATAACGCATTCCAGGTG  
TAAGGGTAGCGGTGCCATTGTGCTAACATCTAGGGACTCTCCGTCCGTGGCATTGGTAGTTTTTGCACCTCTT  
TGACTTTTTCGACGGGGACCTCAACAGCTCTCAGCTCAGCAACACCGTCAACAACGTTTTTCGAAATCACCTCCT  
GGGCCGTAGTCTGCTGTCTGAATTTCTCTCTCCACCGCAGTATGTATCGTCTGTCCCTTGTCAATTTCTATGC  
CCAATTTCTCGAAGCTCAGCCGAGTCCGCTGTAAACAATTGCTTCCATCCGGTGATTTTGTGGAATATCTGGA  
CATGTTTCGCCCAATTAGGCGTAGGAATGTTTCGACATCGGGCACGAATGGGGTAGGTGATGGCACTGTTGCG  
GGTTTTCGAGATTGATGAAGGTACCGTACGCATGGCTGATAATGGGGGTTTGTGACGGAAGTGAAGAGCCGTA  
GTGGAAGGGATGTTCTGGCATTAAAGCCCGGTATGCGCGCCGAGCC**CAT**AGTGGTTATATCGCCTTATATCAA  
ACCGTTCAATGTCGAGATCTGGGGGGTGAAGATTTTAATTTAGCTCGTGGTGTAAAGAACCCATCGGGGGCG  
TGACGAAAGCGAAAAAGCCACGGCACCAAGGGCCAGGTAAACCGGTAAGGGACTCAAGGCGAGTCAATCCA  
ATGCTCAATGGCGCTGTATAGAAGATGTTCAACTGGTTCTTCGACTTCGTTCAAGATTTTGCACAAAATTTT  
GAATTAGGTCCGACGGCCTTAGCTCGGATCAACAAAACGCCGATCTCCGGTGAGCTCGGGCCAGCCGAAGCTT  
CCATCGCAACATTCAAAGATGAAAGACGACGATATATATTTTGATAACAAACAAAGCTGTATTGTTGATTGAA  
TACTAGGAGAGCTGCTCAGAGCAGTGTCTCACTCTTGTGCCACTCTATCCTTTGTCTCGCGAAATTGGTGGAA  
GCCAATTTTCGCTTGACATTATGGCAGTGTGCGCGCTTCCCTCTCAATTCCCTCCCATCACTACTACCGGTGCT  
CCAAAGTCGTTAGCGATGAGAAATATTGCTTCTCAAGAGCCTCGGACGGCGCCTAGTGGTGATCCTGCAGTTC  
CTAAGCCCTCCATGCCCGAACAGAGCTGGCGGAGCAGTTAAACGCTGATGTACGGCGGAAATATGTCAAAGG  
TGGGCGGGCAAATACACCCCAACCATTGGGACCCATAATGCTAACATTTGGTTATTCTGAAAGATAAGAAGC  
TCGGTGAAGGTACATATGCAGTTGTTTACCTAGGCCATCTACGAGATGATCCCACTTCGCTAATAAAGAGCGA  
CTTCGCATCTTTTCGACAGAAAAAAGGTCGAGCAAGGGAAAGTTCGCTCAGCCTGGCCTGCCATTGACTCTAA  
GCGCCGTGCTTCTCTTGCTTGGGGCTTGCTGCAGCTTGGCCTGGGCTTGTCCGGCCTGGAACTCAGGGAGCC  
GAAAGATAACTAGTTATTTATTTTCGTCTCCGCACACCTCGGCGGCTGTCTCATAGTCGGGATATACATAGTAC  
GGGGTAGCAGGTAGACTCACACGCTGCCTCTCTCTGCTGAACTGCTTCTACCACCTTCGACAGCGACACTGTT  
CGGTCTTGCAACTACGGTAGAGTGTGTTGGGGCTTGATCTTGCCTGCCATCGACTTGGAGTTGAAGTTGCGAA  
GCCATTGGCAGTCCATCCGGGATATTCGTAACGTCGCTCAACTTCTTCACGCCGGGCCAAAAC**ATG**CCTCCGC  
AGAGGGAGAGAAGCAATCTGAAGAGAGAAAGGTAAGATATGAACACGTTATATCCAATTAGTTTCTCAGAAG  
GATGAAAATATTCAAGCTGCTAACTTCTTTTCCCAAACCTGCAGGGCAACGCAGCTCCAGACCATGAATCAA  
GAAGCCACGGAGATCTCCTCGAATCTCATCTCAATTGCAGCAGGATGCCGGATATCTACCTTCTCCCCTAGCT  
AATGAAGTAATCTCAGAAGAAAAGCGTGAAGTTGCTACAGTTTCTCCCCAGAAGGCCGCCGAAACCAGGCGC  
CTCGAGGTCAATCGCCAGACGAGTCGTCATGTCCCACCCAGGGTTTCTCTCAGTATCCCCAATCCAATCCAT  
TGACGATGTGGAAGACGAGGTGGCCCAGGGCATATGGGGATATCTTACTCCGCTAGATAACAATTTTGGAGGC  
CAATTGGTTCTGAAGAAGCGGGACAGCACAATACTACACCGGTAATTGGAGCAGCATCAGACATATCAACGC  
CGGAAAGCAACGCCTCAAACGTGGAAGTAGAGAGATAAAACCGCGCTGGATATCTTATAGGCCGGCATGCAGA  
GTGCGGTATGCCTTTACCCATTGCATACTCTCTGCCGTCTAGTGATCAATTGCTAACCATCTGGGTACTGCAG  
ATTTACAGGATCAAGCTCCCCACGATATCCAACCGCCATTGCCTGATATTCACGAAAACAGGGGAGGAGACTT  
TGTTGCAATTGTGGAAGATCTCTCTATCAATGGCACTTTCATCAACGACGCCATCATCGGCAAGAACAACGC



CGAGAGCTCGAAAACGGCGACGAGATTACCATCCTGCAAGAATCCAGATTTCATCTTCAACTACCCGCGGAGTC  
GGAACACAAGCAAGTTCCGACAGCAGTATAAGCTCTTTGATATGCTGGGTAGGGGACACTTTGCCTCGGTTTA  
TCTATGCGCTGAACGTTCTACGGGGATCAAGTATGCCGTCAAACATTTTCGAGAAACGCCGGGCGCAGTTCAG  
AGGCTAGACCGTGAAGCACTACAGCAAGAGATTTCAATGCTGATGAGTGTCAACCATCCGAACATGCTGTGCC  
TAAAGGATACCTTTGACGAGAGCGATGGTGTCTTCCTGATTCTTGAGCTTGCGCCAGAGGGCGAACTGTTCAA  
CTGGATCATTAGGCATCAGAACTCAGCGAGGAGGAGACTCGAAAAGTATTCATTCAGCTTTTTTGAAGGTTTG  
AGATACCTGGTATGTCGTTTCGTTTTCTGGTTGATCAGACTCATGGCAGTGTATATGGCTAACCCTTGTCTGAG  
CATGAACGAAACATCATTACCGTGACATAAAGCCAGAGAACATTCTGGTTGTGACAAAAGATCTTACCGTAA  
AATTAGCAGACTTCGGCCTTGCAAAGATTGTGCGCGAACACTCCTTTACCACCACGCTGTAAGTTCACCTACC  
TTCTGCCGTTCAAATCTGGGGTCAATCTTACTAAGAGATCATAAAATCTAGATGTGGAACGCCTGGCTGTAAG  
TTTCCCTGCTGCTCTGTTAACGCTGGTGCTTTCATCCACCAAATGTGAATCTAACAATTCTTATCAGATGTTG  
CTCCTGAGATACTGGCAGAAAACGCTGAAGCCAGAATGTACACCCGAGCGGTTGACATCTGGTCACTCGGAGT  
GGTACTCTACATCTGCCTGTGCGGATTCCCTCCTTTCTCAGATGAACTGTACCACCAAGAGACTACCCATAC  
ACTCAGAAAGAGCAGATCCAGCTCGGAATATTTAAGTATCCTCTTCCATACTGGGACTCAATCGATTATAGAG  
CCATGGACCTTATCGACTCCATGATCGAAGTCGACGTGAAGGAGCGTTTGAAAGTAGATGAGTGTCTCCAGCA  
CCCATGGATCACTGGCATCGACCCGATGAGCCTAGGGTGGCAGACAGCACCGATGACCTAGCCGGGGCCATC  
GGTGGCCTGAGGTGTCAAAGAACGCCGGCCAATATGGTCCGCAGGCTGTTGAGTGACATACATGAAGTAC  
GGTCAAGCAGGTGGTGAAGACCAAGGAAGACGACCCTGCTTCCCAGGACATAACTATATACCAGAATCATCCT  
GTGCCCTCGAGCCAGGAGCCCAAACCGGCTGGCAACCGGAACTCAAAGGAGTTCATGGAACTCGGTGGAAGTG  
GAGACCAGGTGTTATTCGATGAGCAGTCTGACGACTCGCTGGAGCTTGAGAGTGAGGCACGGAAGCCAGTTGT  
CCACCAAGACGACGCAGACAAGACTCCACGAGAAAGAAAAGG**GTAG**CAGAAGCCCATCCGTCTTGGGATGGT  
ATTCTGCTAGCTATACCGTGCTATTCCGGACTTTTGTTCCTAATTCCTTTTTTCGTTTATATTGATTGTGATCT  
TTCTTAATTTTTTCTTTAACTATACCCCCGGTTGAAAGGTGATAGGGGGCCAATAACCGAAAAGCAGCAGA  
AAAACCGGCTTGGTCGCTGCCTTGGAGACGACGGCGATTCTCGTGTTTAGGATTTCATTTTTGAGTGATATAA  
CTATGGGTACAATAGCGTCCACTGGGCAATGTAATTACAGTCTCTTCTCACTCACCACCGACAATAATAACA  
ATATTAATATTGACGGACCGTTGATAGCTTAACCTGCCATGACTAAGCCGGCCTCCCTGAAGCCGCGATGGCC  
TGATGATGCGCCACCGTCAGGTCTCGCTCGCTCAGGCAGCAGAGAATCCAGCGGAGGAGATGACGCCCTGC  
ACGAACACCGTCCAGGGACCGTCTCCGCCCGTCGCGAGCTCGAATTGTAATCATCTCGACGGCCGTTGGCCT  
GCTCGCCGCAAGGGAGAAAAAGGGGGCAGAAGGGCAGCGTAATTTTTGGTATTGGAGATGCAGCTGTAAACC  
AATAAAAAACGACGTAAAATACCAGGAACAATGCATTATCTTACAGTACCGTACGCCCTTGCATAAAATGCG  
AGTTCGATCTCAAGATGCAACTTTTTTTTTTCCCTTGCTTCGTCCGCAGCAGCTTCAAGGCATTTCATCACAAC  
AACGAACAAGTCTTGAGCGGAAGCAGGAGGATAAGACGATCACC**ATGGGCCTCTTAGCCGACATTGTCTCTCG**  
TTTTCTGCGAGA**ACTGCTCGACCCTGTCCACCGCCGCGCTCGTCGCAAGTGCCGATCGGCTTTTATCGTCCTC**  
TCCATTGTTATCAACGTCTGCAGCAGCTCCTGTTCAAGGACCCTACAAAGCCTCCGGTGGTCTTCCACTGGG  
TTCCGGTCATTGGAAGCACGATCTCCTATGGAATTGACCCGTACAAGTTCTTTGACGACTGCAAGGAGAAGGT  
TAGTTGGTGCAATTCAACTTAGCTATATAACCAGGTTGCGCAAAGCTAACGTATAAATAATTTCCGGTACTCTAG  
TATGGAGACATCTTACATTACTACTGCTGGGCAAGAAGACGACTGTTTTTCTCGGTACAAAGGGAAATGATT  
TCATTTTGAACGGCAAGCTCAAGGATGTTTGCGCGGAGGATGTCTACTCCCCCTCACCACCCCCAGTGTTCGG

ACGACATGTGGTGTATGATTGCCCAAACCTCCAAGCTCATGGAGCAGAAGAAGGTGTGTACAGCAATTTATTCC  
CGTCTACATCTCCTGGGCCTCCATTGCTAATTTAATCGTTCTACCAGTTCGTCAAGTTCGGCCTCACCTCTGA  
AGCTCTCCGATCCTATGTCACCCTGATCACCAAGGAAGTTGAGCAGTTCTTCGAGTCTCCCCGTCTTCAAG  
GGCGACTCCGGAGTTTTTCAACGTCAGCAAGGTCATGGCTGAAATCACCATCTACACCGCCTCTCGATCTCTAC  
AGGGCAAGGAGGTGCGAGGAAAGTTCGATTCCAGCTTTGCGGAACTCTACTCCGATCTCGACATGGCTTCGCC  
GCCATCAACTTCATGTTCCCATGGTTCCCTTCCCACACAACCGCAAGCGTGACCGTGCTCAAAGAAGATGG  
CCCAGGTTTACACCGACATCATCCGTCAGCGACGTGAGGCTGGTGGAGAGAAAGACTCCGAGGACATGGTATG  
GAACTTGATGTCGTCCGTGTACAAGAATGGAACGCCAATTCAGATATCGAAGTCGCCACATGATGATTGCT  
CTTCTTATGGCTGGCCAGCACTCTTCTTCCCTCCACCGCTCCTGGATCGTTCTCCGCCTTGCCAGCCGTCCAG  
ATATTCTCGAGGAACTCTACGAGGAACAGAAACGTGTTCTCGGCGAGGATCTTCCACCACTCACCTACGAATC  
TCTCCAGAAACTTGATCTTCAACAATGTAATCAAGGAGACTCTCCGCCTCCACGCTCCCATCCACTCTATC  
CTCCGTGCTGTTAAATCCCCTATGCCCGTTGAAGGAACTAACTATGTTGTCCCAACCTCTCACAACCTCCTTG  
CCGCTCCTGGTGTTCCTCACGAGACCCTCAGTACTTCCCTGACCCTCTTGTTTGGAAACCCTCACCGATGGGA  
GAACAACGTCGGTGTACCGTAGTCGAGGCCAGTGAAGAAAAGACAGATTACGGATACGGTTTTGGTTAGCAAG  
GGTGCCAACAGCCCTTACCTCCCATTCCGGCTCAGGCAGACACAGATGCATCGGTGAACAATTTGCATATGTTT  
AGCTTGGAACCGTAACAGCTACGTTAGCCAGACTAATGAAATGGAAGCAAGTTGAAGGCACCAAAGATGTTGT  
GCCGCCAACTGACTATTCGGTAAGTTTGGCATATTACGCTCCTTTTTTATTTTGCTCGATTTTACTAACTTTGC  
ATTAATAGTCCCTCTTCTCGAAGCCCCTTGGCGACCCAATGGTCTCGTGGGAGAAGCGAAAGCAGCCTTCCCA  
GAAATGATAATCACGACTGCGGATTGAATCATGTTAAATTTCTTGCTTCTTGCTAATTTATTTCTTCTTTTT  
CTTACGTTTTATACACCGAGCCATATTTGCACCTTTATGGTCAAGCAATAGGTTTTTCGGAATAGAGCATATGTA  
ATAAAAACCTTTCTTTTGACCATGCTTTTTGAAGATGGGGGATGTAGATAATAGTATTATTCTAATACAGCCATT  
TATTACAATACTCTAGATGAACAGGAAAGTTGCAGTTACTCCGTTAGCTTTGGTGCAGAAACAAAATGGTAAT  
ATACATTGGAAAATAGTACATCTTCCGTAGCTGGGATAATCTAGCATCTAAACAGCGATATCCAAGCCAGTAAT  
GTCAGGAAGTAACCAGCCAGCAACGTCGTTAATCCCGTGCCCCCTTTCAACTCCGACGCTACAAAACGCCTAA  
GCAGCTGCCTGAGCATTCTCCTCTCCGCCAACGCTCTCTTCGCTCTGATCTCCTTCTGTCTTCTCTGACCAC  
CGTCAATCTTTCTGCCACGCTTATGCTCCCACATGCCATCAGTAACCTGAACCTTGACGGCGGTACTCCATGT  
GTTTGGATAAATCTGAGCATAACGGCCCTTGATCATATTCCCGTGGTGCAATTTATAATGGGCAAACCTTTTTG  
AGTGGCTTGGAAATATCCTTGAGCTCTGTTTCGCCTGGTGGTAGATTGACAATCGCATAACGCATTCCAGGTG  
TAAGGGTAGCGGTGCCATTGTGCTAACATCTAGGGACTCTCCGTCCGTGGCATTGGTAGTTTTTGCACCTCTT  
TGACTTTTCGACGGGGACCTCAACAGCTCTCAGCTCAGCAACACCGTCAACAACGTTTTTCGAAATCACCTCCT  
GGGCCGTAGTCCCTGTCTGAATTTCTCTCTCCACCGCAGTATGTATCGTCTGTCCCTTGTCAATTTCTATGC  
CCAATTCTCGAAGCTCAGCCGAGTCCGCTGTAAACAATTGCTTCCATCCGGTGATTTTGCTGGAATATCTGGA  
CATGTTTTCGCCCAATTAGGCGTAGGAATGTTTCGACATCGGGCACGAATGGGGTAGGTGATGGCACTGTTGCG  
GGTTTTTCGAGATTGATGAAGGTACCGTACGCATGGCTGATAATGGGGGTTTGTGACGGAAAGTGAAGAGCCGTA  
GTGGAAGGGATGTTCTGGCATTAAAGCCCGGTATGCGCGCCGAGCCATAGTGGTTATATCGCCTTATATCAA  
ACCGTTCAATGTCGAGATCTGGGGGTGAAGATTTTAAATTTAGCTCGTGGTGAAGAACACCATCGGCGGGCG  
TGACGAAAGCGAAAAAGCCACGGCACCAAGGCCAGGTAAACCGGTAAGGGACTCAAGGCGAGTCAATCCA  
ATGCTCAATGGCGCTGTATAGAAGATGTTCAACTGGTTCTTCGACTTCGTTCAAGATTTTGCACCAAATTTT

GAATTAGGTCCGACGGCCTTAGCTCGGATCAACAAAACGCCGATCTCCGGTGAGCTCGGGCCAGCCGAAGCTT  
CCATCGCAACATTCAAAGATGAAAGACGACGATATATATTTTGATAACAAAACAAAGCTGTATTGTTGATTGAA  
TACTAGGAGAGCTGCTCAGAGCAGTGTCTCACTCTTGTGCCACTCTATCCTTTGTCTCGCGAAATTGGTGGAA  
GCCAATTTTCGCTTGACATTATGGCAGTGTGCGCGCTTCCCTCTCAATTCCCTCCCATCACTACTACCGGTGCT  
CCAAAGTCGTTAGCGATGAGAAAATATTGCTTCTCAAGAGCCTCGGACGGCGCCTAGTGGTGATCCTGCAGTTC  
CTAAGCCCTCCATGCCCCGAACCAGAGCTGGCGGAGCAGTTAAACGCTGATGTACGGCGGAAATATGTCAAAGG  
TGGGCGGGCAAATACACCCCAACCATTGGGACCCCATAAATGCTAACATTTGGTTATTCTGAAAGATAAGAAGC  
TCGGTGAAGGTACATATGCAGTTGTTTACCTAGGCCATCTACGAGATGATCCCCTTCGCTAATAAAGAGCGA  
CTTCGCATCTTTTCGACAGAAAAAAGGTCGAGCAAGGGAAGTTCGCTCAGCCTGGCCTGCCATTGACTCTAA  
GCGCCGTCGTTCTCTTGCTTGGGGCTTGCTGCAGCTTGGCCTGGGCTTGTCCGGCCTGGAACCTCAGGGAGCC  
GAAAGATAACTAGTTATTTATTTTCGTCTCCGCACACCTCGGCGGCTGTCTCATAGTCGGGATATACATAGTAC  
GGGTAGCAGGTAGACTCACACGCTGCCTCTCTGCTGAACTGCTTCTACCACCTTCGACAGCGACACTGTT  
CGGTCTTGCAACTACGGTAGAGTGTGTTGGGGCTTGATCTTGCCATCGACTTGAGTTGAAGTTGCGAA  
GCCATTGGCAGTCCATCCGGGATATTCGTAAC TGCCGTCAACTTCTTCACGCCGGGCCAAAAC **ATGCCTCCGC**  
**AGAGGGAGAGAAGCAATCTGAAGAGAGAAAAGGTAAGATATGAACACGTTATATCCAATTAGTTTCTCAGAAG**  
**GATGAAAATATTCAAGCTGCTAACTTCTTTTCCCAAACCTGCAGGGCAACGCAGCTCCAGACCATGAATCAA**  
**GAAGCCACGGAGATCTCCTCGAATCTCATCTCAATTGCAGCAGGATGCCGGATATCTACCTTCTCCCCTAGCT**  
**AATGAAGTAATCTCAGAAGAAAAGCGTGAAGTTGCTACAGTTTCTCCCCAGAAGGCCGCGAAACCAGGCGC**  
**CTCGAGGTCAATCGCCAGACGAGTCGTTCATGTCCCACCCAGGGTTTCTCTCAGTATCCCCAATCCAATCCAT**  
**TGACGATGTGGAAGACGAGGTGGCCCAGGGCATATGGGGATATCTTACTCCGCTAGATAACAATTTTGGAGGC**  
**CAATTGGTTTCTGAAGAAGCGGGACAGCACAAATACTACACCGGTAATTGGAGCAGCATCAGACATATCAACGC**  
**CGGAAAGCAACGCCTCAAAACGTGGAAC TAGAGAGATAAAACCGCGCTGGATATCTTATAGGCCGGCATGCAGA**  
**GTGCGGTATGCCTTTACCCATTGCATACTCTCTGCCGTCTAGTGATCAATTGCTAACCATCTGGGTACTGCAG**  
**ATTTTCAGGATCAAGCTCCCCACGATATCCAACCGCCATTGCCTGATATTCACGAAAACAGGGGAGGAGACTT**  
**TGTTGCAATTGTGGAAGATCTCTCTATCAATGGCACTTTCATCAACGACGCCATCATCGGCAAGAACAACGC**  
**CGAGAGCTCGAAAACGGCGACGAGATTACCATCCTGCAAGAATCCAGATTCATCTTCAACTACCGCGGAGTCG**  
**GAACACAAGCAAGTTCGCACAGCAGTATAAGCTCTTTGATATGCTGGGTAGGGGACACTTTGCCTCGGTTTAT**  
**CTATGCGCTGAACGTTCTACGGGGATCAAGTATGCCGTCAAACATTTTCGAGAAACGCCCGGGCGCAGTTCAGA**  
**GGTAGACCGTGAAGCACTACAGCAAGAGATTTCAATGCTGATGAGTGCAACCATCCGAACATGCTGTGCCT**  
**AAAGGATACCTTTGACGAGAGCGATGGTGTCTTCCCTGATTCTTGAGCTTGCGCCAGAGGGCGAACTGTTCAAC**  
**TGGATCATTAGGCATCAGAAACTCAGCGAGGAGGAGACTCGAAAAGTATTCATTTCAGCTTTTTTGAAGGTTTGA**  
**GATACCTGGTATGTCGTTTCGTTTCTGGTTGATCAGACTCATGGCAGTGTATATGGCTAACCGTTGTCGTAGC**  
**ATGAACGAAACATCATTACCCGTGACATAAAGCCAGAGAACATTCTGGTTGTCGACAAAAGATCTTACCGTAAA**  
**ATTAGCAGACTTCGGCCTTGCAAAGATTGTCGGCGAACACTCCTTTACCACCACGCTGTAAGTTCACCTACCT**  
**TCTGCCGTTCAAATCTGGGGTCAATCTTACTAAGAGATCATAAAATCTAGATGTGGAACGCCTGGCTGTAAGT**  
**TTCCCTGCTGCTCTGTAAACGCTGGTGTCTTCATCCACCAAATGTGAATCTAACAATCTTATCAGATGTTGC**  
**TCCTGAGATACTGGCAGAAAACGCTGAAGCCAGAATGTACACCCGAGCGGTTGACATCTGGTCACTCGGAGTG**  
**GTACTCTACATCTGCCTGTGCGGATTCCCTCCTTTCTCAGATGAACTGTACCACCCAAGAGACTACCCATACA**

CTCAGAAAGAGCAGATCCAGCTCGGAATATTTAAGTATCCTCTTCCATACTGGGACTCAATCGATTATAGAGC  
CATGGACCTTATCGACTCCATGATCGAAGTCGACGTGAAGGAGCGTTTGAAGTAGATGAGTGTCTCCAGCAC  
CCATGGATCACTGGCATCGACCCCGATGAGCCTAGGGTGGCAGACAGCACCGATGACCTAGCCGGGGCCATCG  
GTGGCCTGAGGGTGTCCAAAGAACGCCGGCCAACCTATGGTCCGCAGGCTGTTGAGTGACATACATGAAGTCAC  
GGTCAAGCAGGTGGTGAAGACCAAGGAAGACGACCCTGCTTCCCAGGACATAACTATATACCAGAATCATCCT  
GTGCCTCGAGCCCAGGAGCCCAAACCGGCTGGCAACCGGAACTCAAAGGAGTTCATGGAACCTCGGTGGAAGTG  
GAGACCAGGTGTTATTTCGATGAGCAGTCTGACGACTCGCTGGAGCTTGAGAGTGAGGCACGGAAGCCAGTTGT  
CCACCAAGACGACGCAGACAAGACTCCACGAGAAAGAAAGAGGTAGCAGAAGCCCGATCCGTCTTGGGATGGT  
ATTCTGCTAGCTATACCGTGCTATTCCGGACTTTTGTTCCTTTCCTTTTCGTTTATATTGATTGTGATCT  
TTCTTAATTTTTTCTTTAACTATACCCCCGGTTGAAAGGTGATAGGGGGCCAACCTAACCGAAAAGCAGCAGA  
AAAACCGGCTTGGTCGCTGCCTTGGAGACGACGGCGATTCTCGTGTTTAGGATTTTCATTTTGAGTGATATAAC  
TATGGGTACAATAGCGTCCACTGGGCAATGTAATTACAGTCTTCTCACTCACCACCGGACAATAATAACAA  
TATTAATATTGACGGACCGTTGATAGCTTAACCTGCCATGACTAAGCCGGCCTCCCTGAAGCCGCGATGGCCT  
GATGATGCGCCCACCGTCAGGTCTCGCTCGCTCAGGCAGCAGAGAATCCAGCGGAGGAGATGACGCCCTGCAC  
GAACACCGTCCAGGGACCGTCTCCGCCCGTCGCGAGCTCGAATTGTAATCATCTCGACGGCCGTTGGCCTGC  
TCGCCGCAAGGGAGAAAAAGGGGGCAGAAGGGCAGCGGTAATTTTTGGTATTGGAGATGCAGCTGTAAACCAA  
TAAAAACGACGTAAAATACCAGGAACAATGCATTATCTTACAGTACCGTACGCCCTTGCATAAAAATGCGAG  
TTCGATCTCAAGATGCAACTTTTTTTTTCCCTTGCTTCGTCCGCAGCAGCTTCAAGGCATTCATCACAAACAA  
CGAACAAAGTCTTGAGCGGAAGCAGGAGGATAAGACGATCACCATGGGCCTCTTAGCCGACATTGTCTCTCGTT  
TCTGCGAGAAGTGTCTCGACCCTGTCCACCGCCGCGCTCGTCGCAAGTGCCGTATCGGCTTTTATCGTCCTCTC  
CATTGTTATCAACGTCTCTGCAGCAGCTCCTGTTCAAGGACCCTACAAAGCCTCCGGTGGTCTTCCACTGGGTT  
CCGGTCATTGGAAGCACGATCTCCTATGGAATTGACCCGTACAAGTTCTTTGACGACTGCAAGGAGAAGGTTA  
GTTGGTGAATTCACCTTAGCTATATAACCAGGTTGCGCAAAGCTAACGTATAAATAAATTCGGTACTCTAGTA  
TGGAGACATCTTCACATTCATACTGCTGGGCAAGAAGACGACTGTTTTTCTCGGTACAAAGGGAAATGATTTT  
ATTTTGAACGGCAAGCTCAAGGATGTTTTCGCGGAGGATGTCTACTCCCCCTCACCACCCAGTGTTCCGGAC  
GACATGTGGTGTATGATTGCCCAAACCTCCAAGCTCATGGAGCAGAAGAAGGTGTGTACAGCAATTTATTCCCG  
TCTACATCTCCTGGGCCTCCATTGCTAATTTAATCGTCTACCAGTTCGTCAAGTTCGGCCTCACCTCTGAAGC  
TCTCCGATCCTATGTCACCCTGATCACCAAGGAAGTTGAGCAGTTCTTCGAGTCTCCCCGCTTCAAGGGC  
GACTCCGGAGTTTTCAACGTGAGCAAGGTCATGGCTGAAATCACCATCTACACCGCCTCTCGATCTCTACAGG  
GCAAGGAGGTGCGAGGAAAGTTCGATTCCAGCTTTGCGGAACTCTACTCCGATCTCGACATGGGCTTCGCCGC  
CATCAACTTCATGTTCCCATGGTTCCCTTCCCACACAACCGCAAGCGTGACCCTGCTCAAAGAAGATGGCC  
CAGGTTTACACCGACATCATCCGTCAGCGACGTGAGGCTGGTGGAGAGAAAGACTCCGAGGACATGGTATGGA  
ACTTGATGTGCTCCGTGTACAAGAATGGAACGCCAATTCAGATATCGAAGTCGCCACATGATGATTGCTCT  
TCTTATGGCTGGCCAGCACTCTTCTTCCCTCCACCGGCTCCTGGATCGTTCTCCGCCTTGCCAGCCGTCCAGAT  
ATTCTCGAGGAACTCTACGAGGAACAGAAACGTGTTCTCGGCGAGGATCTTCCACCACCTCACCTACGAATCTC  
TCCAGAACTTGATCTTCACAACAATGTAATCAAGGAGACTCTCCGCTCCACGCTCCCATCCACTCTATCCT  
CCGTGCTGTTAAATCCCCTATGCCCGTTGAAGGAACTAACTATGTTGTCCCAACCTCTCACAACCTCCTTGCC  
GCTCCTGGTGTCCCTCACGAGACCCTCAGTACTTCCCTGACCCTCTTGTGTTGGAACCTCACCGATGGGAGA

ACAACGTCGGTGTACCCGTAGTCGAGGCCAGTGAAGAAAAGACAGATTACGGATACGGTTTGGTTAGCAAGGG  
TGCCAACAGCCCTTACCTCCCATTTCGGCTCAGGCAGACACAGATGCATCGGTGAACAATTTGCATATGTTTCAG  
CTTGGAACCGTAACAGCTACGTTAGCCAGACTAATGAAATGGAAGCAAGTTGAAGGCACCAAAGATGTTGTGC  
CGCCAACCTGACTATTCGGTAAGTTTGGCATATTACGCTCCTTTTTTATTTTGTCTCGATTTTACTAACTTTGCAT  
TAAATAGTCCCTCTTCTCGAAGCCCCTTGGCGACCCAATGGTCTCGTGGGAGAAGCGAAAGCAGCCTTCCCAGA  
AATGA TAATCACGACTGCGGATTGAATCATGTTAAATTTCTTGCTTCTTGCTAATTTATTTCTTCTCTTTTCT  
TACGTTTATACACCGAGCCATATTTGCACTTTATGGTACGCAAATAGGTTTTTCGGAATAGAGCATATGTAAT  
AAAACTTTCTTTGACCATGCTTTTGAAGATGGGGGATGTAGATAATAGTATTATTCTAATACAGCCATTTA  
TTACAATACTCTAGATGAACAGGAAAGTTGCAGTTACTCCGTTAGCTTTGGTGCAGAAACAAAATGGTAATAT  
ACATTGGAAATAGTACATCTTCCCGTAGCTGGGATAATCTAGCATCTAAACAGCGATATCCAAGCCAGTAATG  
TCAGGAAGTAACCAGCCAGCAACGTCGTTAATCCCGTGCCCCCTTCAACTCCGACGCTACAAAAACGCCTAA  
GCAGCTGCCTGAGCATTCTCCTCTCCGCCAACGCTCTCTTCGCTCTGATCTCCTTCTGTCTTCTCTGACCAC  
CGTCAATCTTTCTGCCACGCTTATGCTCCCACATGCCATCAGTAACCTGAACCTTGACGGCGGTACTCCATGT  
GTTTGAATAATCTGAGCATACGGCCCCTTGATCATATTCCCGTGGTGCAATTTATAATGGGCAAACCTTTTTG  
AGTGGCTTGGAAGTATCCTTGAGCTCTGTTTCGCCTGGTGGTAGATTGACAATCGCATAACGCATTCCAGGTG  
TAAGGGTAGCGGTGCCATTGTGCTAACATCTAGGGACTCTCCGTCCGTGGCATTGGTAGTTTTTGCACCTCTT  
TGACTTTTTCGACGGGGACCTCAACAGCTCTCAGCTCAGCAACACCGTCAACAACGTTTTTCGAAATCACCTCCT  
GGGCCGTAGTCTGCTGTCTGAATTTCTCTCTCCACCGCAGTATGTATCGTCTGTCCCTTGTCAATTTCTATGC  
CCAATTTCTCGAAGCTCAGCCGAGTCCGCTGTAAACAATTGCTTCCATCCGGTGATTTTGTCTGGAATATCTGGA  
CATGTTTCGCCCAATTAGGCGTAGGAATGTTTCGACATCGGGCACGAATGGGGTAGGTGATGGCACTGTTGCG  
GGTTTTCGAGATTGATGAAGGTACCGTACGCATGGCTGATAATGGGGGTTTGTGACGGAAGTGAAGAGCCGTA  
GTGGAAGGGATGTTCTGGCATTAAAGCCCCTGATGCGCGCCGAGCCATAGTGGTTATATCGCCTTATATCAA  
ACCGTTCAATGTCGAGATCTGGGGGGTGAAGATTTTAAATTTAGCTCGTGGTGTAAAGAACACCATCGGGCGGGC  
TGACGAAAGCGAAAAAGCCACGGCACCAAGGGCCAGGTAAACCGGTAAAGGACTCAAGGCGAGTCAATCCA  
ATGCTCAATGGCGCTGTATAGAAGATGTTCAACTGGTTCTTCGACTTCGTTCAAGATTTTGCACCAAATTTT  
GAATTAGGTCCGACGGCCTTAGCTCGGATCAACAAAACGCCGATCTCCGGTGAGCTCGGGCCAGCCGAAGCTT  
CCATCGCAACATTCAAAGATGAAAGACGACGATATATATTTTGATAACAAACAAAGCTGTATTGTTGATTGAA  
TACTAGGAGAGCTGCTCAGAGCAGTGTCTCACTCTTGTGCCACTCTATCCTTTGTCTCGCGAAATTGGTGGAA  
GCCAATTTGCTTGACATTATGGCAGTGTGCGCGCTTCCCTCTCAATTCCCTCCCATCACTACTACCGGTGCT  
CCAAAGTCGTTAGCGATGAGAAATATTGCTTCTCAAGAGCCTCGGACGGCGCCTAGTGGTGTATCCTGCAGTTC  
CTAAGCCCTCCATGCCCGAACAGAGCTGGCGGAGCAGTTAAACGCTGATGTACGGCGGAAATATGTCAAAGG  
TGGCGGGCAAATACACCCCAACCATTGGGACCCATAATGCTAACATTTGGTTATTCTGAAAGATAAGAAGC  
TCGGTGAAGGTACATATGCAGTTGTTTACCTAGGCCATCTACGAGATGATCCCCTTCGCTAATAAAGAGCGA  
CTTCGCATCTTTTCGACAGAAAAAAGGTCGAGCAAGGGAAAGTTTCGCTCAGCCTGGCCTGCCATTGACTCTAA  
GCGCCGTGCTTCTTGTGCTTGGGGCTTGTGTCAGCTTGGCCTGGGCTTGTCCGGCCTGGAACCTCAGGGAGCC  
GAAAGATAACTAGTTATTTATTTTCGTCTCCGCACACCTCGGCGGCTGTCTCATAGTCGGGATATACATAGTAC  
GGGGTAGCAGGTAGACTCACACGCTGCCTCTCTGCTGAACTGCTTCTACCACCTTCGACAGCGACACTGTT  
CGGTCTTGCAACTACGGTAGAGTGTGTTGGGGCTTGTATCTGCCTGCCATCGACTTGGAGTTGAAGTTGCGAA

GCCATTGGCAGTCCATCCGGGATATTCGTAACTGCCGTCAACTTCTTCACGCCGGGCCAAAAC**ATGCCTCCGC**  
AGAGGGAGAGAAGCAATCTGAAGAGAGAAAAGGGTAAGATATGAACACGTTATATCCAATTAGTTTCTCAGAA  
GGATGAAAATATTCAAGCTGCTAACTTCTTTTCCCAAACCTGCAGGGCAACGCAGCTCCAGACCATGAATCAA  
AGAAGCCACGGAGATCTCCTCGAATCTCATCTCAATTGCAGCAGGATGCCGGATATCTACCTTCTCCCCTAGC  
TAATGAAGTAATCTCAGAAGAAAAGCGTGAAGTTGCTACAGTTTCTCCCCAGAAGGCCGCCGAAACCAGGCG  
CCTCGAGGTCAATCGCCAGACGAGTCGTCAATGTCCCACCCAGGGTTTCTCTCAGTATCCCCAATCCAATCCA  
TTGACGATGTGGAAGACGAGGTGGCCAGGGCATATGGGGATATCTTACTCCGCTAGATAACAATTTTGGAGG  
CCAATTGGTTCTGAAGAAGCGGGACAGCACAAATACTACACCGGTAATTGGAGCAGCATCAGACATATCAACG  
CCGAAAGCAACGCCTCAAACGTGGAAGTAGAGAGATAAACCGCGCTGGATATCTTATAGGCCGGCATGCAG  
AGTGCGGTATGCCTTTACCCATTGCATACTCTCTGCCGTCTAGTGATCAATTGCTAACCATCTGGGTACTGCA  
GATTTCAGGATCAAGCTCCCCACGATATCCAACCGCCATTGCCTGATATTCCACGAAAACAGGGGAGGAGACT  
TTGTTGCAATTGTGGAAGATCTCTCTATCAATGGCACTTTCATCAACGACGCCATCATCGGCAAGAACAACG  
CCGAGAGCTCGAAAACGGCGACGAGATTACCATCCTGCAAGAATCCAGATTCACTTCAACTACCCGCGGAGT  
CGAACACAAGCAAGTTCCGACAGCAGTATAAGCTCTTTGATATGCTGGGTAGGGGACACTTTGCTCGGTTT  
ATCTATGCGCTGAACGTTCTACGGGGATCAAGTATGCCGTCAAACATTTTCGAGAAAACGCCCGGGCGCAGTTCA  
GAGGCTAGACCGTGAAGCACTACAGCAAGAGATTTCAATGCTGATGAGTGTCAACCATCCGAACATGCTGTGC  
CTAAAGGATACCTTTGACGAGAGCGATGGTGTCTTCTGATTCTTGAGCTTGCGCCAGAGGGCGAACTGTTCA  
ACTGGATCATTAGGCATCAGAACTCAGCGAGGAGGAGACTCGAAAAGTATTCATTACAGCTTTTTGAAGGTTT  
GAGATACCTGGTATGTCGTTTCGTTTTCTGGTTGATCAGACTCATGGCAGTGTATATGGCTAACCGTTGTCGTA  
GCATGAACGAAACATCATTACCCGTGACATAAAGCCAGAGAACATTCTGGTTGTGACAAAAGATCTTACCGTA  
AAATTAGCAGACTTCGGCCTTGCAAAGATTGTCGGCGAACACTCCTTTACCACCACGCTGTAAGTTCACCTAC  
CTTCTGCCGTTCAAATCTGGGGTCAATCTTACTAAGAGATCATAAAATCTAGATGTGGAACGCCTGGCTGTAA  
GTTTCCCTGCTGCTCTGTTAACGCTGGTGTCTTCATCCACCAAATGTGAATCTAACAAATCTTATCAGATGTT  
GCTCCTGAGATACTGGCAGAAAACGCTGAAGCCAGAATGTACACCCGAGCGGTTGACATCTGGTCACTCGGAG  
TGGTACTCTACATCTGCCTGTGCGGATTCCCTCCTTTCTCAGATGAACTGTACCACCCAAGAGACTACCCATA  
CACTCAGAAAGAGCAGATCCAGCTCGGAATATTTAAGTATCCTCTTCCATACTGGGACTCAATCGATTATAGA  
GCCATGGACCTTATCGACTCCATGATCGAAGTCGACGTGAAGGAGCGTTTGAAAGTAGATGAGTGTCTCCAGC  
ACCCATGGATCACTGGCATCGACCCCGATGAGCCTAGGGTGGCAGACAGCACCCGATGACCTAGCCGGGGCCAT  
CGGTGGCCTGAGGGTGTCAAAGAACGCCGGCCAACCTATGGTCCGCAGGCTGTTGAGTGACATACATGAAGTC  
ACGGTCAAGCAGGTGGTGAAGACCAAGGAAGACGACCCTGCTTCCCAGGACATAACTATATAACCAGAATCATC  
CTGTGCCTCGAGCCAGGAGCCCAAACCGGCTGGCAACCGGAACTCAAAGGAGTTCATGGAACCTCGGTGGAAGT  
GGAGACCAGGTGTTATTCGATGAGCAGTCTGACGACTCGCTGGAGCTTGAGAGTGAGGCACGGAAGCCAGTTG  
TCCACCAAGACGACGCAGACAAGACTCCACGAGAAAGAAAAGAGG**TAG**CAGAAGCCCGATCCGTCTTGGGATGG  
TATTCTGCTAGCTATACCGTGCTATTCCGGACTTTTGTTCCTAATTCCTTTTTCGTTTTATATTGATTGTGATC  
TTTCTTAATTTTTTCTTTAACTATACCCCGGTTGAAAGGTGATAGGGGGCCAACTAACCGAAAAGCAGCAGA  
AAAACCGGCTTGGTCGCTGCCTTGGAGACGACGGCGATTCTCGTGTTTAGGATTTCATTTTTGAGTGATATAA  
CTATGGGTACAAAGCGTCCACTGGGCAATGTAATTACAGTCTCTTCTCACTCACCACCGACAATAATAACA  
ATATTAATATTGACGGACCGTTGATAGCTTAACCTGCCATGACTAAGCCGGCCTCCCTGAAGCCGCGATGGCC

TGATGATGCGCCCACCGTCAGGTCTCGCTCGCTCAGGCAGCAGAGAATCCAGCGGAGGAGATGACGCCCTGCA  
CGAACACCGTCCAGGGACCGTCTCCGCCCGTTCGCGAGCTCGAATTGTAATCATCTCGACGGCCGTTGGCCTG  
CTCGCCGCAAGGGAGAAAAAGGGGGGCGAGAAGGGCAGCGTAATTTTGGTATTGGAGATGCAGCTGTAAACC  
AATAAAAAACGACGTAAAAATACCAGGAACAATGCATTATCTTACAGTACCGTACGCCCTTGCATAAAATGCG  
AGTTCGATCTCAAGATGCAACTTTTTTTTTTCCCTTGCTTCGTCCGCAGCAGCTTCAAGGCATTTCATCACAAC  
AACGAACAAGTCTTGAGCGGAAGCAGGAGGATAAGACGATCACC**ATGGGCCTCTTAGCCGACATTGTCTCTCG**  
**TTTCTGCGAGAACTGCTCGACCCTGTCCACCGCCGCGCTCGTCGCAAGTGCCGTATCGGCTTTTATCGTCCTC**  
**TCCATTGTTATCAACGTCTGCAGCAGCTCCTGTTCAAGGACCTACAAAGCCTCCGGTGGTCTTCCACTGGG**  
**TTCCGGTCATTGGAAGCACGATCTCCTATGGAATTGACCCGTACAAGTCTTTGACGACTGCAAGGAGAAGGT**  
**TAGTTGGTGCAATTCAACTTAGCTATATAACCAGGTTGCGCAAAGCTAACGTATAAAATAATTTCCGGTACTCTAG**  
**TATGGAGACATCTTCACATTCATACTGCTGGGCAAGAAGACGACTGTTTTTCTCGGTACAAAGGGAAATGATT**  
**TCATTTTGAACGGCAAGCTCAAGGATGTTTTGCGCGGAGGATGTCTACTCCCCCTCACCCAGTGTTCCG**  
**ACGACATGTGGTGTATGATTGCCAAACTCCAAGCTCATGGAGCAGAAGAAGGTGTGTACAGCAATTTATTC**  
**CGTCTACATCTCCTGGGCCTCCATTGCTAATTTAATCGTCTACCAGTTCGTCAAGTTCGGCCTCACCTCTGAA**  
**GCTCTCCGATCCTATGTCACCCTGATCACCAAGGAAGTTGAGCAGTTCCTCGAGTCTCCCCCGTCTTCAAG**  
**GGCGACTCCGGAGTTTTTCAACGTCAGCAAGGTCATGGCTGAAATCACCATCTACACCGCCTCTCGATCTCTAC**  
**AGGGCAAGGAGGTGCGAGGAAAGTTCGATTCCAGCTTTGCGGAACTCTACTCCGATCTCGACATGGGCTTCGC**  
**CGCCATCAACTTCATGTTCCCATGGTTCCTTCCACACAACCGCAAGCGTGACCGTGCTCAAAAGAAGATG**  
**GCCCAGGTTTACACCGACATCATCCGTGAGCGACGTGAGGCTGGTGGAGAGAAAGACTCCGAGGACATGGTAT**  
**GGAAC TTGATGTCGTCCGTGTACAAGAATGGAACGCCAATTCAGATATCGAAGTCGCCACATGATGATTGC**  
**TCTTCTTATGGCTGGCCAGCACTCTTCTTCTCCACCGGCTCCTGGATCGTTCTCCGCCTTGCCAGCCGTTCA**  
**GATATTCTCGAGGAACTCTACGAGGAACAGAAACGTGTTCTCGGCGAGGATCTTCCACCACTCACCTACGAAT**  
**CTCTCCAGAACTTGATCTTCAACAATGTAATCAAGGAGACTCTCCGCCTCCACGCTCCCATCCACTCTAT**  
**CCTCCGTGCTGTTAAATCCCCATGCCCCGTTGAAGGAACTAACTATGTTGTCCCAACCTCTCACAACCTCCTT**  
**GCCGCTCCTGGTGTTCCTCACGAGACCCTCAGTACTTCCCTGACCCTCTTGTTTTGGAACCCTCACCGATGGG**  
**AGAACAACGTCGGTGTACCCGTAGTCGAGGCCAGTGAAGAAAAGACAGATTACGGATACGGTTTGGTTAGCAA**  
**GGGTGCCAACAGCCCTTACCTCCATTCGGCTCAGGCAGACACAGATGCATCGGTGAACAATTTGCATATGTT**  
**CAGCTTGAACCGTAACAGCTACGTTAGCCAGACTAATGAAATGGAAGCAAGTTGAAGGCACCAAAGATGTTG**  
**TGCCGCCAACTGACTATTCCGGTAAGTTTTGGCATATTACGCTCCTTTTTATTTTGCTCGATTTTACTAACTTTG**  
**CATTAATAGTCCCTCTTCTCGAAGCCCCTTGGCGACCCAATGGTCTCGTGGGAGAAGCGAAAGCAGCCTTCCC**  
**AGAAATGA****TAATCAGCACTGCGGATTGAATCATGTTAAATTTCTTGCTTCTTGCTAATTTATTTCTTCTTTT**  
**TCTTACGTTTATACACCGAGCCATATTTGCACTTTATGGTCACGCAATAGGTTTTTCGGAATAGAGCATATGT**  
**AATAAAACTTTCTTTTGACCATGCTTTGAAGATGGGGGATGTAGATAATAGTATTATTCTAATACAGCCATT**  
**TATTACAATACTCTAGATGAACAGGAAAGTTGCAGTTACTCCGTTAGCTTTGGTGCAGAAACAAAATGGTAAT**  
**ATACATTGAAAATAGTACATCTTCCCGTAGCTGGGATAATCTAGCATCTAAACAGCGATATCCAAGCCAGTAA**  
**TGTCAGGAAGTAACCAGCCAGCAACGTCGTTAATCCGTGCCCCCTTTCAACTCCGACGCTACAAAACGC****CTAA**  
**GCAGCTGCCTGAGCATTCTCCTCTCCGCCAACGCTCTCTTCGCTCTGATCTCCTTCTGTCTTCTCTGACCAC**  
**CGTCAATCTTTCTGCCACGCTTATGCTCCACATGCCATCAGTAACCTGAACCTTGACGGCGGTACTCCATGT**

GTTTGAATAATCTGAGCATACGGCCCCTTGATCATATTCCGTGGTGAATTTATAAATGGGCAAACCTTTTGA  
GTGGCTTGAAGTATCCTTGAGCTCTGTTTCGCCTGTGGTAGATTGACAATCGCATAACGCATTCCAGGTGTA  
AGGGTAGCGGTGCCATTGTGCTAACATCTAGGGACTCTCCGTCCGTGGCATTGGTAGTTTTTGCACCTCTTTG  
ACTTTTCGACGGGGACCTCAACAGCTCTCAGCTCAGCAACACCGTCAACAACGTTTCGAAATCACCTCCTGGG  
CCGTAGTCCTGCTGTCTGAATTTCTCTCTCCACCGCAGTATGTATCGTCTGTCCCTTGTCAATTTCTATGCCCA  
ATTCTCGAAGCTCAGCCGAGTCCGCTGTAAACAATTGCTTCCATCCGGTGATTTTGTGCTGGAATATCTGGACAT  
GTTTCGCCCAATTAGGCGTAGGAATGTTTCGACATCGGGCACGAATGGGGTAGGTGATGGCACTGTTGCGGGT  
TTTCGAGATTGATGAAGGTACCGTACGCATGGCTGATAATGGGGGTTTGTGACGGAAGTGAAGAGCCGTAGTG  
GAAGGGATGTTCTGGCATTAAAGCCCCTGATGCGCGCCGCAGCC**AT**AGTGGTTATATCGCCTTATATCAAACC  
GTTCAATGTTCGAGATCTGGGGGTGAAGATTTTAATTTAGCTCGTGGTGTAAAGAACACCATCGGCGGGCGTGA  
CGAAAGCGAAAAAGCCACGGCACCAAGGGCCCAGGTAAACCGGTAAGGGACTCAAGGCGAGTCAATCCAATG  
CTCAATGGCGCTGTATAGAAGATGTTCAACTGGTTCTTCGACTTCGTTCAAGATTTTGCACCAAAATTTGAA  
TTAGGTCCGACGGCCTTAGCTCGGATCAACAAAACGCCGATCTCCGGTGAGCTCGGGCCAGCCGAAGCTTCCA  
TCGCAACATTCAAAGATGAAAGACGACGATATATATTTTGTAAACAAACAAAGCTGTATTGTTGATTGAATAC  
TAGGAGAGCTGCTCAGAGCAGTGTCTCACTCTTGTGCCACTCTATCCTTTGTCTCGCGAAATTGGTGAAGCC  
AATTCGCTTGACATTATGGCAGTGTGCGCCGCTTCCCTCTCAATTCCTCCATCACTACTACCGGTGCTCAA  
GTCGTTAGCGATGAGAAATATTGCTTCTCAAGAGCCTCGGACGGCGCCTAGTGGTGTATCCTGCAGTTCCTAAG  
CCCTCCATGCCCGAACCAGAGCTGGCGGAGCAGTTAAACGCTGATGTACGGCGGAAATATGTCAAAGGTGGGC  
GGGCAAATACACCCCAACCATTGGGACCCCATTAATGCTAACATTTGGTTATTCTGAAAGATAAGAAGCTCGGT  
GAAGGTACATATGCAGTTGTTTACCTAGGCCATCTACGAGATGATCCCCTTCGCT**AATAAAGAGCGACTTCG**  
**CATCTTTTCGACAGAAAAAAGGTCGAGCAAGGGAAGTTCGCTCAGCCTGGCCTGCCATTGACTCTAAGCGCC**  
**GTCGTTCTCTTGCTTGGGGGCTTGCTGCAGCTTGGCCTGGGCTTGTCCGGCCTGGAACTCAGGGAGCCGAAAG**  
**ATAACTAGTTATTTATTTTCGCTCCTCGCACACCTCGGCGGCTGTCTCATAGTCGGGATATACATAGTACGGGGT**  
**AGCAGGTAGACTCACACGCTGCCTCTCTCTGCTGAACT**

[Read No.m64281e\_230107\_125321/89260242/ccs] [Sense (+) strand]

AAT~ACC (5'UTR)

ATG~TAG (*chkB* protein kinase genomic DNA) (Forward sequence)

ATG~TGA (*TinCYP51B* gene) (Forward sequence)

TAA~GCT (3'UTR)

CTA~CAT (*FYV4* genomic DNA) (Reverse sequence)

CGT~ (Downstream sequence of the 7374 block)

CTCCTGGGCCGTAGTCCTGCTGTCTGAATTTCTCTCTCCACCGCAGTATGTATCGTCTGTCCCTTGTCAATTT  
TATGCCCAATTTCTCGAAGCTCAGCCGAGTCCGCTGTAAACAATTGCTTCCATCCGGTGATTTTGTGCTGGAATAT  
CTGGACATGTTTCGCCCAATTAGGCGTAGGAATGTTTCGACATCGGGCACGAATGGGGTAGGTGATGGCACTG  
TTGCGGGTTTTTCGAGATTGATGAAGGTACCGTACGCATGGCTGATAATGGGGGTTTGTGACGGAAGTGAAGAG



CCGTAGTGGAAGGGATGTTCTGGCATTAAAGCCCGGTATGCGCGCCGCAGCC**AT**AGTGGTTATATCGCCTTAT  
ATCAAACCGTTCAATGTCGAGATCTGGGGGGTGAAGATTTTAATTTAGCTCGTGGTGTAAAGAACCCATCGGC  
GGGCGTGACGAAAGCGAAAAAGCCACGGCACCAAGGGCCCAGGTAAACCGGTAAGGGACTCAAGGCGAGTCA  
ATCCAATGCTCAATGGCGCTGTATAGAAGATGTTCAACTGGTTCTTCGACTTCGTTCAAGATTTTGCACAAA  
ATTTTGAATTAGTCCGACGGCCTTAGCTCGGATCAACAAAACGCCGATCTCCGGTGAGCTCGGGCCAGCCGA  
AGCTTCCATCGCAACATTCAAAGATGAAAGACGACGATATATATTTTGATAACAAACAAAGCTGTATTGTTGA  
TTGAATACTAGGAGAGCTGCTCAGAGCAGTGTCTCACTCTTGTGCCACTCTATCCTTTGTCTCGCGAAATTGG  
TGAAGCCAATTCGCTTGACATTATGGCAGTGTGCGCGCTTCCCTCTCAATTCCCTCCCATCACTACTACCG  
GTGCTCCAAAGTCGTTAGCGATGAGAAATATTGCTTCTCAAGAGCCTCGGACGGCGCCTAGTGGTGATCCTGC  
AGTTCCTAAGCCCTCCATGCCCGAACCAGAGCTGGCGGAGCAGTTAAACGCTGATGTACGGCGGAAATATGTC  
AAAGGTGGGCGGGCAAATACACCCCAACCATTGGGACCCATAATGCTAACATTTGGTTATTCTGAAAGATAA  
GAAGCTCGGTGAAGGTACATATGCAGTTGTTTACCTAGGCCATCTACGAGATGATCCCACTTCGCTAATAAAG  
AGCGACTTCGCATCTTTTCGACAGAAAAAAGGTTCGAGCAAGGGAAGTTCGCTCAGCCTGGCCTGCCATTGAC  
TCTAAGCGCCGTCGTTCTCTTGCTTGGGGGCTTGTGTCAGCTTGGCCTGGGCTTGTCCGGCCTGGAATCAGG  
GAGCCGAAAGATAACTAGTTATTTATTTTCGTCTCCGCACACCTCGGCGGCTGTCTCATAGTCGGGATATACAT  
AGTACGGGGTAGCAGGTAGACTCACACGCTGCCTCTCTCTGCTGAACTGCTTCTACCACCTTCGACAGCGACA  
CTGTTCCGGTCTTGCAACTACGGTAGAGTGTGTTGGGGCTTGATCTTGCCATCGACTTGAGATTGAAGTT  
GCGAAGCCATTGGCAGTCCATCCGGGATATTGTAAGTCCGCTCAACTTCTTACGCCGGGCCAAAAAC**ATGCC**  
TCCGCAGAGGGAGAGAAGCAATCTGAAGAGAGAAAGGGTAAGATATGAACACGTTATATCCAATTAGTTTCTC  
AGAAGGATGAAAATATTCAAGCTGCTAACTTCTTTTCCCAAACCTGCAGGGCAACGCAGCTCCAGACCATGAA  
TCAAAGAAGCCACGGAGATCTCCTCGAATCTCATCTCAATTGCAGCAGGATGCCGGATATCTACCTTCTCCCC  
TAGCTAATGAAGTAATCTCAGAAGAAAAGCGTGAAGTTGCTACAGTTTCTCCCCCAGAAGGCCGCCGAAACCA  
GGCGCCTCGAGGTCAATCGCCAGACGAGTCGTTCATGTCCACCCAGGGTTTCTCTCAGTATCCCCCAATCCAA  
TCCATTGACGATGTGGAAGACGAGGTGGCCCAGGGCATATGGGGATATCTTACTCCGCTAGATAACAATTTG  
GAGGCCAATTGGTTCTGAAGAAGCGGGACAGCACAATACTACACCGGTAATTGGAGCAGCATCAGACATATC  
AACGCCGAAAGCAACGCCTCAAACGTTGGAAGTGAAGAGATAAACCGCGCTGGATATCTTATAGGCCGGCAT  
GCAGAGTGCGGTATGCCTTTACCATTGCATACTCTCTGCCGTCTAGTGATCAATTGCTAACCATCTGGGTAC  
TGCAGATTTAGGATCAAGCTCCCCACGATATCCAACCGCCATTGCCTGATATTCCACGAAAACAGGGGAGGA  
GACTTTGTTGCAATTGTGGAAGATCTCTCTATCAATGGCACTTTCATCAACGACGCCATCATCGGCAAGAACA  
AACGCCGAGAGCTCGAAAACGGCGACGAGATTACCATCCTGCAAGAATCCAGATTCATCTTCAACTACCCGCG  
GAGTCGGAACACAAGCAAGTTCCGACAGCAGTATAAGCTCTTTGATATGCTGGGTAGGGGACACTTTGCCTCG  
GTTTATCTATGCGCTGAACGTTCTACGGGGATCAAGTATGCCGTCAAACATTTTCGAGAAACGCCCGGGCGCAG  
TTCAGAGGCTAGACCGTGAAGCACTACAGCAAGAGATTTCAATGCTGATGAGTGTCAACCATCCGAACATGCT  
GTGCCTAAAGGATACCTTTGACGAGAGCGATGGTGTCTTCTGATTCTTGAGCTTGCGCCAGAGGGCGAACTG  
TTCAACTGGATCATTAGGCATCAGAACTCAGCGAGGAGGAGACTCGAAAAGTATTCATTCAGCTTTTTGAAG  
GTTTGAGATACCTGGTATGTCGTTTCGTTTTCTGGTTGATCAGACTCATGGCAGTGTATATGGCTAACCGTTGT  
CGTAGCATGAACGAAACATCATTCACCGTGACATAAAGCCAGAGAACATTCGTTGTTGTCGACAAAGATCTTAC  
CGTAAAATTAGCAGACTTCGGCCTTGCAAAGATTGTGCGGCAACACTCCTTTACCACCAGCTGTAAGTTTAC

CTACCTTCTGCCGTTCAAATCTGGGGTCAATCTTACTAAGAGATCATAAAATCTAGATGTGGAACGCCTGGCT  
GTAAGTTTCCCTGCTGCTCTGTTAACGCTGGTGCCTTTCATCCACCAAATGTGAATCTAACAAATTCTTATCAGA  
TGTTGCTCCTGAGATACTGGCAGAAAACGCTGAAGCCAGAATGTACACCCGAGCGGTTGACATCTGGTCACTC  
GGAGTGGTACTCTACATCTGCCTGTGCGGATTCCCTCCTTTCTCAGATGAACTGTACCACCCAAGAGACTACC  
CATACTACTCAGAAAGAGCAGATCCAGCTCGGAATATTTAAGTATCCTCTTCCATACTGGGACTCAATCGATTA  
TAGAGCCATGGACCTTATCGACTCCATGATCGAAGTGCACGTGAAGGAGCGTTTGAAAAGTAGATGAGTGTCTC  
CAGCACCCATGGATCACTGGCATCGACCCCGATGAGCCTAGGGTGGCAGACAGCACCCGATGACCTAGCCGGGG  
CCATCGGTGGCCTGAGGGTGTCCAAAGAACGCCGGCCAACCTATGGTCCGCAGGCTGTTGAGTGACATACATGA  
AGTCACGGTCAAGCAGGTGGTGAAGACCAAGGAAGACGACCCTGCTTCCAGGACATAACTATATACCAGAAT  
CATCCTGTGCCTCGAGCCCAGGAGCCAAACCGGCTGGCAACCGGAACTCAAAGGAGTTCATGGAACCTCGGTG  
GAAGTGGAGACCAGGTGTTATTCGATGAGCAGTCTGACGACTCGCTGGAGCTTGAGAGTGAGGCACGGAAGCC  
AGTTGTCCACCAAGACGACGCAGACAAGACTCCACGAGAAAAGAAAGAGGTAGCAGAAGCCCGATCCGTCTTGG  
GATGGTATTCTGCTAGCTATACCGTGCTATTCCGGACTTTTGTTCCTTTCCTTTTTCGTTTATATTGATTG  
TGATCTTTCTTAATTTTTTCTTTAACTATAACCCCGGTTGAAAGGTGATAGGGGGCCAACTAACCGAAAAGC  
AGCAGAAAAACCGGCTTGGTCGCTGCCTTGGAGACGACGGCGATTCTCGTGTTTAGGATTTTCAATTTTTGAGTG  
ATATAACTATGGGTACAATAGCGTCCACTGGGCAATGTAATTACAGTCTCTTCTCACTCACCACCGGACAATA  
ATAACAATATTAATATTGACGGACCGTTGATAGCTTAACCTGCCATGACTAAGCCGGCCTCCCTGAAGCCGCG  
ATGGCCTGATGATGCGCCCACCGTCAGGTCTCGCTCGCTCAGGCAGCAGAGAATCCAGCGGAGGAGATGACGC  
CCTGCACGAACACCGTCCAGGGACCGTCTCCGCCCCGTCGCGAGCTCGAATTGTAATCATCTCGACGGCCGTT  
GGCCTGCTCGCCGCAAGGGAGAAAAAGGGGGCAGAAGGGCAGCGGTAATTTTTGGTATTGGAGATGCAGCTGT  
AAACCAATAAAAAACGACGTAAAATACCAGGAACAATGCATTATCTTACGTACCGTACGCCCTTGCATAAA  
ATGCGAGTTTCGATCTCAAGATGCAACTTTTTTTTTCCCTTGCTTCGTCCGCAGCAGCTTCAAGGCATTCATCA  
CAAACAACGAACAAGTCTTGAGCGGAAGCAGGAGGATAAGACGATCACCATGGGCCTCTTAGCCGACATTGTC  
TCTCGTTTTCTGCGAGAAGTCTCGACCCCTGTCCACCGCCGCGCTCGTCGCAAGTGCCGTATCGGCTTTTATCG  
TCCTCTCCATTGTTATCAACGTCCTGCAGCAGCTCCTGTTC AAGGACCCTACAAAGCCTCCGGTGGTCTTCCA  
CTGGGTTCCGGTCATTGGAAGCACGATCTCCTATGGAATTGACCCGTACAAGTTCTTTGACGACTGCAAGGAG  
AAGGTTAGTTGGTGAATTC AACTTAGCTATATAACCAGGTTGCGCAAAGCTAACGTATAAATAATTTTCGGTAC  
TCTAGTATGGAGACATCTTACATTCATACTGCTGGGCAAGAAGACGACTGTTTTTCTCGGTACAAAGGGAAA  
TGATTTCAATTTG AACCGCAAGCTCAAGGATGTTTGCGCGGAGGATGTCTACTCCCCCTCACCACCCAGTG  
TTCGGACGACATGTGGTGTATGATTGCCAAACTCCAAGCTCATGGAGCAGAAGAAGGTGTGTACAGCAATTT  
ATTCCCCTCTACATCTCCTGGGCCTCCATTGCTAATTTAATCGTCTACCAGTTCGTCAAGTTCGGCCTCACCT  
CTGAAGCTCTCCGATCCTATGTCACCCTGATCACCAAGGAAGTTGAGCAGTTCTTCGAGTCTCCCCCGTCTT  
CAAGGGCGACTCCGGAGTTTTCAACGTCAGCAAGGTCATGGCTGAAATCACCATCTACACCGCCTCTCGATCT  
CTACAGGGCAAGGAGGTGCGAGGAAAGTTCGATTCCAGCTTTGCGGAACTCTACTCCGATCTCGACATGGGCT  
TCGCCGCCATCAACTTCATGTTCCCATGGTTCCTTCCACACAACCGCAAGCGTGACCGTGCTCAAAAGAA  
GATGGCCCAGGTTTACACCGACATCATCCGTCAGCGACGTGAGGCTGGTGGAGAGAAAAGACTCCGAGGACATG  
GTATGGAACCTGATGTGCTCCGTGTACAAGAATGGAACGCCAATTCAGATATCGAAGTCGCCACATGATGA  
TTGCTCTTCTTATGGCTGGCCAGCACTCTTCTTCCCTCCACCGGCTCCTGGATCGTTCTCCGCCTTGCCAGCCG

TCCAGATATTCTCGAGGAACTCTACGAGGAACAGAAACGTGTTCTCGGCGAGGATCTTCCACCACTCACCTAC  
GAATCTCTCCAGAACTTGATCTTCACAACAATGTAATCAAGGAGACTCTCCGCTCCACGCTCCCATCCACT  
CTATCCTCCGTGCTGTTAAATCCCCTATGCCCGTTGAAGGAACTAACTATGTTGTCCCAACCTCTCACAACCT  
CCTTGCCGCTCCTGGTGTTCCTCACGAGACCCTCAGTACTTCCCTGACCCTCTTGTGTTGGAACCTCACC  
TGGGAGAACAACGTTCGGTGTACCGTAGTCGAGGCCAGTGAAGAAAAGACAGATTACGGATACGGTTTGGTTA  
GCAAGGGTGCCAACAGCCCTTACCTCCCATTTCGGCTCAGGCAGACACAGATGCATCGGTGAACAATTTGCATA  
TGTTTCAGCTTGAACCGTAACAGCTACGTTAGCCAGACTAATGAAATGGAAGCAAGTTGAAGGCACCAAAGAT  
GTTGTGCCGCCAACTGACTATTTCGGTAAGTTTGGCATATTACGCTCCTTTTTATTTTGTCTCGATTTTACTAAC  
TTTGCATTAATAGTCCCTCTTCTCGAAGCCCCTTGGCGACCCAATGGTCTCGTGGGAGAAGCGAAAGCAGCCT  
TCCAGAAATGA TAATCACGACTGCGGATTGAATCATGTTAAATTTCTTGCTTCTTGCTAATTTATTTCTTCT  
CTTTTCTTACGTTTATACACCGAGCCATATTTGCACCTTATGGTTCACGCAAATAGGTTTTTCGGAATAGAGCAT  
ATGTAATAAAAACTTTCTTTTGACCATGCTTTTGAAGATGGGGGATGTAGATAATAGTATTATTCTAATACAG  
CCATTTATTACAATACTCTAGATGAACAGGAAAGTTGCAGTTACTCCGTTAGCTTTGGTGCAGAAACAAAATG  
GTAATATACATTGAAATAGTACATCTTCCCGTAGCTGGGATAATCTAGCATCTAAACAGCGATATCCAAGCC  
AGTAATGTCAGGAAGTAACCAGCCAGCAACGTCGTTAATCCCGTGCCCCCTTCAACTCCGACGCTACAAAAC  
GCCTAAGCAGCTGCCTGAGCATTCCCTCCTCTCCGCCAACGCTCTCTTCGCTCTGATCTCCTTCTGTCTTCTCT  
GACCACCGTCAATCTTTCTGCCACGCTTATGCTCCACATGCCATCAGTAACCTGAACCTTGACGGCGGTACT  
CCATGTGTTTGAATAATCTGAGCATAACGGCCCCTTGATCATATTCCCGTGGTGAATTTATAATGGGCAAAC  
TTTTTGAGTGGCTTGAAGTATCCTTGAGCTCTGTTTCGCCTGGTGGTAGATTGACAATCGCATAACGCATTC  
CAGGTGTAAGGGTAGCGGTGCCATTGTGCTAACATCTAGGGACTCTCCGTCGGTGGCATTGGTAGTTTTTGC  
ACTCTTTGACTTTTCGACGGGGACCTCAACAGCTCTCAGCTCAGCAACACCGTCAACAACGTTTTTCGAAATCA  
CCTCCTGGGCCGTAGTCTGCTGTCTGAATTTCTCTCTCCACCGCAGTATGTATCGTCTGTCCCTTGTCAATTT  
CTATGCCCAATTCTCGAAGCTCAGCCGAGTCCGCTGTAAACAATTGCTTCCATCCGGTGATTTTGTGGAATA  
TCTGGACATGTTTCGCCCAATTAGGCGTAGGAATGTTTCGACATCGGGCACGAATGGGGTAGGTGATGGCACT  
GTTGCGGGTTTTTCGAGATTGATGAAGGTACCGTACGCATGGCTGATAATGGGGTTTTGTGACGGAAGTGAAGA  
GCCGTAGTGAAGGGATGTTCTGGCATTAAAGCCCAGTATGCGCGCCGACGCATAGTGGTTATATCGCCTTA  
TATCAAACCGTTCAATGTGAGATCTGGGGGTGAAGATTTTAATTTAGCTCGTGGTGAAGAACACCATCGG  
CGGGCGTGACGAAAGCGAAAAAGCCACGGCACCAAGGGCCAGGTAAACCGGTAAGGGACTCAAGGCGAGTC  
AATCCAATGCTCAATGGCGCTGTATAGAAGATGTTCAACTGGTTCTTCGACTTCGTTCAAGATTTTGCACCAA  
AATTTTGAATTAGTCCGACGGCCTTAGCTCGGATCAACAAAACGCCGATCTCCGGTGAGCTCGGGCCAGCCG  
AAGCTTCCATCGCAACATTCAAAGATGAAAGACGACGATATATTTTTGATAACAAAACAAAGCTGTATTGTTG  
ATTGAATACTAGGAGAGCTGCTCAGAGCAGTGTCTCACTCTTGTGCCACTCTATCCTTTGTCTCGCGAAATTG  
GTGGAAGCCAATTTTCGCTTGACATTATGGCAGTGTGCGCCGTTCCCTCTCAATTCCTCCCATCACTACTACC  
GGTGCTCCAAAGTCGTTAGCGATGAGAAATATTGCTTCTCAAGAGCCTCGGACGGCGCCTAGTGGTGTATCCTG  
CAGTTCCTAAGCCCTCCATGCCCGAACAGAGCTGGCGGAGCAGTTAAACGCTGATGTACGGCGGAAATATGT  
CAAAGGTGGGCGGGCAAATACCCCCAACCATTTGGGACCCCATTAATGCTAACATTTGGTTATTCTGAAAGATA  
AGAAGCTCGGTGAAGGTACATATGCAGTTGTTTACCTAGGCCATCTACGAGATGATCCCACTTCGCTCGTTGC  
AATCAAGAAAATAAACTAAACGCCGAGTACAAGGACGGGCTATCCATGGACGCCATCCGTGAAGTAAAGTAC

CTTCAGGAACTGTCTCACCCGAACGTAATTGCGTTGCATGACGTTTTCTCCTCAAAGGATCAAAATCTAAACC  
TCGTCCTTGAATTTTTACCCTTGGAGATCTTGAAATGTTGATCAAAGACAACCTCTATCCAGTACGGTGTGGCT  
GATATAAAAGCATGGATAAGCATGCTTGCACGTGGAGTGTGGTTCTGTCATAAGAATTTTATTCTACACCGTG  
ATATTAAGCCTAACAACTTATTAATTGCATCGGATGGAGAAGTTAAATTAGCGGATTTTGGTCTTGCCAGATC  
CTTTGCCGATCCATATCTCAACATGACACATCAAGTCATCACAAGATGGTACAGGCCATTAGAACTACTCTTC  
GGCGCCAGGCAATATTCCGGTGCAGTCGACATATGGTCTATGGGAATGGTGTTCGCTGAGCTTATTCTGCGCG  
TTCCATTGCGCGCTGGAAACACGGATATGGACCAAATATCTAAAATTTGTGCTGCATTTGGGGCACCTACGGA  
AGAAAACCTGGCCTGGGGTGACAAAGCTGCCAACTACGTCCCAATCGAGGAAAACCATGTCATACCCCTACAA  
GGCCGCGAATTTCTCCTCCGCAATTTCCGACAGCTGGACCTTTGGGGCCGATCTACTTGCCTCCATGTTAA  
AACTTGATCCAAGGAAACGAATTACGGCCACTCAAGTCTTGACAGCATCAGTGGTGGCTTGCTGAGCCTAAACC  
AACTAAGAACGAGGACCTGCCTAGGAAATCAGGAGGAGAAAAGAAAATGGGCAACGATATGGGCAGACGAGTT  
GGTGAGATTGACGAGTCAAAAATTTAAAGGAGTGTCCCGTCAACTTGATTTCCGAGCTATGAAGAAAATGAGAGG  
ATCCGACTTGCCATCCGGAATATAATACTCAAAAATTTATCGCCTCCTTGGTTAGCAAGCGAGCAGATATCGCG  
TACCGACAAATATATGCTACAAGAAGAAGTGATACACAACATTTCTGGGCCGCTCCTCTTTGTGGGTGCAATGC  
TGTGTAAACATCGGCCTCAATGAGAGCCCAATTTGGTTAATGAGCTGCAGCCTTACCAATACGGAGGAGACGT  
CAGTAGCAGGCCCTATACCACACTCAGCAGGAAGCCGATACGCGTAAATCTATGCTTTCATGAGCCAGGCAG  
TTCCCTGATGGCCACAAACCAGGCGGCATTGTTTGACCTTGGGGTTGATCTATCAAAAAGGGGAATATCTCC  
TAATTTGAAGCCCACCCTCAAAGTAATGGGTTGAAATTCAAAAGCAGCACCCCTACTTGATAACGCCTACCCT  
CTTTAGTACTGCAGGATTCATTGTGTACTTGACATCATATATAATCTGGTAGAATAGGCCTTGGGCGTGCCAT  
GCATAGAGAGAGACGTTGATGATATATGGTTTCAAAGTGATTCTATGGGAGTTACCGCTTTCCTCAACTTAAAAG  
CCTTTGGCTAGCCGTAAAACACCTAACCATTCGGTCACTTTTTCCGGTTGAAGGGGCTCCCACGAAGTTACTCT  
CGTTCCTGCATCTGAATCCATGAGCTCGTTCGTTGGTAGTGATTTGGTAGCTTGTGATACGGATGAGGTAGTG  
GCTGCGCCAGCCCCGCCAGTATATGCTTGTCTTGGAAAATCCTCGGCAGGGTTAACCATTTTCGTATCCACTCG  
AGACACCATTACTTGAGGCGGTTTTGCGATCGGTTCCGCCTGATGAATGTCGTCTCAATTTTTGCTGGTTTTCT  
AGGTACCGGAGGTGGTATTTTTACCGATTTTACAGTTCTGCTGCTGACGACAACCTTAGAGGTTTGGAGCATG  
TCTGTGGCAGACGATTCAGGACCGCCATAACTTCTCCCACCGATCTAAATGGCTCTCTGTATGTGGAGGATG  
CCTTTTTCGACTCTCGTAGGTCTGCTCGCTCATTTCGCTCAAAGCATCATCTCTTCCGACAGTAATCCAATC  
CGACCCCCGAGAAAATGAAAAAGGATTGGCACCTTCGCCGAACATTGCTCACAGCACCAAGTGGTGGAGTAATA  
GTTGATCGAGCAGGAAGGCCTATAAAATTTGTTAGCTTTAACATATCAATGCTAAAGAGCCGACTAGTTAACTA  
AGTCAAATATACTCACCATGATCAAGCCACCACTTACGCTTTTCCGAGCTGGGAGGTGGAAGGCCTAGCTTTA  
TCGAGTATTGTTTATTATCATCTTCTCATCATCAGACAACGGGTTTTGTAGTTGTGGTGGCAGGTTGTTGCTT  
CAGCTTTTTCATAAAGTCGACAGCTTATTTCTTCTTTTCGCTTCTCATCTACCGTCGATATATCGCACTCGAAT  
GTTGCATAAACAGGTCGATGGTCCGAAAATTTCAAAGGTGCAGTCGTATAGGCTAGCTGTCGTAGAATCCTTC  
CTCTCCAAAGGATCCTGTGCGACCAGGCGGGAATCCTTTGCTTTTTCTCTAGAAGTATTATTAGTATTTACAGG  
TCTAAATGGATGGACTGCCTCTCAAACCTTACGAGGTGTCATATTCATCTGTGCCATTGTCGTATCTATATGTT  
GGAGGGAATGTGACAGGCCCTTCCATATAATACTGGAATGCAAGGCCAGCAACCATTTGGAGGTTGAGCTATT  
GAAAGTTAGTAGTAGTCAGGGCATGTATTCGCGCATCAAGAGACATACCTGGTCATGCTGATATAGTACATCT  
ATATCTCCCGATTCAATTAGAGGCCTCACCCGCTCATTGCTAAGGCCAATCCTATAGTTGAAATCACCGAACC

AGATTGTTGCATCATGTCCGACAATAGGTCTGTTTTCGTTGGAACCTGAGACCCCGAGCTATGGTGTGGTAGTC  
TCTGTTTTCTTTCCTCGTAGTTCGAGAAGCCAGCAGCTAGATGAGCAGTGATGAAGCATATTGACGTATTACTA  
TAGTCCAAGCGGATAGCAACAGCACCTTATTCCCTCCCATGCCAGATAAGCCAGTCTGTTACTCAGTCCAGT  
TAGCCCTGCTTCTCAAAAGATATTATATTCAAAGGATGGATACCTTCTTCAAGCTGCCTTCCGCATTCTTGAT  
CTTATTTATAACATCCTTCTTTACGAACAGCAAGAGTGTGCACCCACTAGCTGACCACTTCTCAGCAAAACG  
TACTCAGTCGTCCCTCTCTTCGTGGTCTTGGCATTGAGTGATGATATAACTGCGTGTCCCATATCTTGCGCG  
TGCTTGGGTGAGTGGACATAAATCTGCTGGGGGCTAAGCTCAACAATCTCTTGAAATCCAACAGCAACTATGGT  
AGGATCCTCAGGAAGTTGGTTAAGAGAGCCGTGCAACCATGGACCCAGTCCCTCAGTAGCTCCTTCACGACGT  
CCGTTGATGTTAAATGTTCCGACCCATATATAGATCTTTTCAGATGAGGTAAACTCGTTTACTCTCCGGGTAA  
GCTCAGCATTCACTGCATCTTTCACCGGATCAAACAGATACACCGACTCCTGATTATTCGAAAGGCCTAGAAG  
GGTATCTATAGTGATTTGTTTTGCTGGGTGCGTAAAGTTGTTAACGAAGAGGCGAGTCGCACTCTTCCCTTATG  
TCTGCAAAGGAACCAGCAACTGACATTGCTCCATGTCTGGTAAACGAAGACTTCAAGGCTCCAGTTCAGCAT  
ATATTCTTGACAACATATCTCCGCTATCAGCCATAGAGTCGAGTGCTTCATCCAGAAATCCGGTGACGCATG  
TCCATTCCACTGGGCAAAAAACATGTCAATTGCCATGCTACTAATCATGGTTTTGGACAAGATTAGTCTGTCC  
AAGCAGTCCAGACAATTTGTTTCGAAAGACACCTTCCCTGTTGTAGTACAATGTTCTTTTTGTCTGAGAAGTCTGA  
GTTCTGCTGCTGATAGATCCTTTTCATTGCCCTGAGGTGCCTCGGATAGGAAATAGGCAAATCCTTCGACAGA  
GTCTGCTATCACATCCTGAATGGAACGGGCAGCCTCATACCCGTTGTTTTCGTTTTCAGCATGGAAGTCTGAT  
TCTGTTAGTTTTCAATATATCATGCTCTGAGTTCGAATTTACATCACGATTCTGGCGCAAGGGACTGGCTCGAA  
CATGATACATATATCTTTGCGACAGCTCCACTTCTCCAGACTTTTGCTTTGGCAAGCAGGTTAATTGCATGCAC  
CGCCCCATATTTCTCAGCTAAAGCTTCAAAGTGTATCAAATGCGGGCTGCGTAGCGCCTGAAGAGCGGCCG  
ATGGCAATTTTCTGCTGTCCAGGTATATAACCAGCTTCCCTGTTCCCAGAATATGGGTACAGAACCTCGAATCT  
GGGTATAAGAAAAGCACATGGCAGGAGGTATCCATAGGATGGTTTTCTGTCTCAACAAAGTTGGCAACGTTTCC  
ATTGTGCTCAATTCCTGCGTGAATCTAGTTCCGGCACGGCGAGAGGAAAGGCGCGATATCACTGTTAAG  
CTAGAGGGCATAATTAGATTCAATGTGTGGGAACAGAGGTGATGAAGCAGGTATGGTTAAGGACTGAGCGAAGC  
CCCTAATGACGGATATAAGAAGCTGAGATGAGTCTAGGTTCTGCCTATCATTCAAGACTCAGTCCACTTCTGAG  
CTGTAGTAAAGGCTTGATCATGAATGAATTCCACAGGAAATCTTCATCCTGGCTCTCAACATCGTAAGCAACC  
GGGTCATCAATTTCTTGCGAAAAAAAATTACGGAATTAGCTGATGTCAATTTCAAGTCTGTTGAGGACACGCG  
TTCTTACCTGTCTGAATGCGTTCCGGTCAAATTAAGTCAAGACTGTAATAGAAGCTTCCGTCACTCAGAAGC  
TTTTTCAATGCTAGAGATGGATTCTCTGCAGGGGATTCGTATCCTTGGTAACCTCTTCCGGAAGGGTTATTAT  
ACGTATCAGAGTCAAGATTCTGGACCAGGTCATAATCGGATCTATTCAAGCAATCTGTATTCTATCTGTCAGC  
CTCATCCGATCAATGGAATGCCGCAAGAATTAGGAGGCTAGAGTTCTCGTACAAAAGTCAACACTGTCTATCC  
TTTGGACTGTTTCTCCAGGCCTCACGCTGGCGACATTGGTTGCTTGGTTGACGATGCATATAAAAACCTCCCC  
AGCCGCGAGCGGATGAGACCGAGCGTTCCAAGTCCAGTTCCCAACGTGCGATACTCAGCCAGGGGTATCGAA  
TCGGCCGTAGTAACTCGACAATACATTTTGGAAATGCTCAGGACCTGTACGTTCCCGGATACTTCTTCGCTTG  
ACTGGTGATGGCGCATGGTGAGGGCGTAGCCATTTGCCACGAGGACAACACTGTGCGGTCCGGCGCATCCTTGCA  
AAGGACTCGCACAGCCATCGCTCCAGGTAGATTTTTTTTTTTTTTTTTTTTTTTTTTTTTTTTTTTTTGGGCTAGAATATAG  
CGGTTATAGCGAAGACTGCGAGCGCATGGGCTGTCTGTTTCCAGCAGAGGTATAGCTGCATATCCTGTTGCGCAG  
AGAGCTGTGTCCAGTGGTTGCATGTTTTTCTTCCACCCATCCGCGGCACCAGAAACGTCGCAAGTGAATTTCC

CTTTTATTTCCCCTGCTATTTGCCTTTCCCTCCTAGCAAGTGACAAATATCACAGGAAGGCGTAAGTGACGGCT  
GCAAGTTTATATATCTTTGGGTTCAAAAGTAGGATGCTGCTTCCAGAGTTCAGCTGGATTTTGATAGTTAT  
AAAATTTGTTAGTTAACTAACTAGTTAGTTTTCTGTTGGGAAAAAAGGTGAAAAGAAAAGGGCCTAAAAGGA  
AGCAATTTAAACATGATGTAGCTGAAGACAGGCAACTTTTCTTTATTTAGTCTTAAAGGAAGTGTGGATAA  
GAAGATGGAGAGTTCAGTTCACGTTATACTCAGTCGATAATAGTAATAGGAAATACACAACACTGCAGTAAC  
TGTATTAATTTGAGGTGTATTATTATATTCTATAAGAAAAGCAGGCACATCTGGTCAAAGACGGCCTTTTCAGA  
CAGTTGTTTGATAATAAAAGATAGCAATCAATCAGTCAGTCAGTTGGTCAGTCAGTTGGCCACTGTAGAAACA  
AACGCCATTGTTTTCCCTCTTCCTCTATGTTCTACTTTTATTCCTTAGATGAACAATGCAACAATAAAGACAGC  
TGCTCCATCCTTCTTCTCACTCCTGGAGAGTTTCGATATTTTCTTGGAGCGTGGCCTGTACGGTTTCGTTTTGC  
TTCTTGTACTTCTCCTCCAGCGATAGCACACGCTTAGCTATCTCATTTTCAACCTCGAGTCTTCTCTTTACC  
AGTTCCTGGAGCTGGTCAAGCTGTGCATTACGATATTCCAGACTATTTAACAGGTCAATAAACCAGCGATGAA  
AGAGTCTTTGAGTGGGAATTATTGGATACGCAACCCGGGCACAATACTAGAGGTAGAAATCTAAATTCAAGTA  
CAGCACCTACATGGCTTGCTTGTTCGATCGAGAGACTTCATTTAACCTGTTCTCAATCTTTCTGACACCCGCT  
TTGTGTCGAGCTTGAATCTCCTGGCATCCGTCATTAGCTGACTTCCGTGCTGCTACCTGGAGAGGCAAAGAGA  
CATTGGTTAATACCCGGGAAGCTAGTATCGCCTTCGCAGACATCAACGAAACAAGCAGAGCTAATGACAGCAT  
TTGCTACTCATGGAATTGTTTACCTTCTTGGGTGGATTGGTCATTTCTGCGCCTGGATCGGCAGATATCCCGC  
TCTCGCTCTCCGCCGTGTTTGCCCTTCGGCTGCTTCTGGCGCGCGTATTTGCTTGTCCCGTTTTTTGTGATTG  
TTTGGCAGCCATGTTTTACCCCTCTGACGACCGGTTTCAAGGATATGCAACAGGATACTCAAACCTCTTTGA  
GCTGCCTCTGAGCGCCTTTGGATCCCTTTTTGATTCTGTCAAATCTCCTGCAGGTTGAAGACATTGATTGAAT  
AGCGCTGGGAAGTCCAATATTACCCAAAAGGGACAAACCAAACAAAGTTATTACATAATATATTATGTAATT  
CTGTTATTGCGGCGTCACTTTCTGCTTGAGTCGTAAACAGCGATATTGACATCCTCGAGGACGACGACGACAT  
GGAAGATAACCAGTTTAACTACATGGTTCAAGCAATTGTACTCTTGTGTTGTAGTATTTCTGGGAATAAACGT  
TGCTGTTGGGAGAGAGACAGACCACACTCCTCACCTACAAACTACTTAAAGCGGCAACATGGGAATATCTT  
ATCAAACCTTCGACCTTTTTTTTTTTTTCTGAGGAAATAAAAAAAAAATAAAATCGATTTCTGTCTATAGCTTTTAT  
CCAGTAGACACAGTCCCTCCGACCGTCACAATGGGTCTAGCCGCTCCTAAGAAGTAAGTCTACCGACTGCCACT  
GTCAATTAATGCCATAGTGCCAATTTAACCGTTTATCAGGAGGACCAAAATTTCAAATGACCCGAATAACACA  
ACGTGGACTCGATCAACGTCCGGCTATGGACACAAAATCATGACCTCCAGGGCTGGGCGCCTGGCGACTTTT  
TGGGTGCAGCAAACAGTAACCGGACCGATACATATACCGCTGCCAGCTTTGGCCACATCCGAGTATCTCTCAA  
AGACGATAACCTAGGGCTGGGGGCTAAACCCCGCCGGCCACTGATAGATGATGAGCCACCGGATTAGACGCA  
TTCCAGGGCCTGCTGGGGCGACTCAATGGAAGGAGTGAAGTTGAAATAGAAAAGGAAATGAAGGTAAACGGG  
ATATCAAAGCCATGACTTATATTGAGCGGAGATGGGGTTGCATGAACTTCATCGGTGGCGGACTCCTGGTACC  
AGACAAGGTCAATAAAATACCAAACGAAGAAGAAAATAAGAGCGCAGATGGCCCTGCAGATGCTAAGCCTGCT  
GAGGGATCGGTGAACGAAGATATAGATACGAAGGAAAAGAGGAAGCGGGACAAGAAGGAGAAAAGGAACGAA  
AAGAGAAGAAAAGAGAAATCCAAGGAGAAGAAGAAGCGGAAAAAGGAAACGCAAGAGTCCGAGGAAATGCGAGA  
TAGCGGATTTGCAACGGAGATATCTGCTCCCGCTTCAAGAGCGGAGACCTCTGACGATGCCGAGACCGATTCA  
AGGACCGAGAAAACAAAAGTCAAGGATAAGAAGAAATCGAAAAAGCGGAAACGAAAAGAAGAAGCGCAAGCTG  
ATAAGACTGAAACTTCATCAAAACCTAGTGAAGAAGATACAAAGGACACCAAGAGAGTGGAGGCATCCCCATC  
AGCACCAGCACCACCTATTGCTGTCAAGGAAAGGGTTATCCCTATTTCTCGACAGCTTCTCCGAGGACGGTAT

ATCCAGCAAAAGAGACGAGCAGTCATGGACTCCAAGTCATTGAACGAGGTATTATATCCTGCTACCTGTTACA  
TCAAGACCTTCTAGCTGACAAAAAGACAGATATTTATGACCACAAGTTGATACCATCTACTTTGCCAGATCT  
CCCCACCTGGACAGGCTCCTTTTTCAATATTCTCTGTTATAGATCCAACATAAAAAGTGACTAGATGATCTTA  
TATACCCATAAAGCGCTATAAATTCTACCTTATTTCTGAAAATTTGCTTTTTTTTTTGGTATCTCGATTCTATCT  
ATCTATACCTATGTTGAATATTTTTTGAATGCCTGGAATCATCTTTACAGACGCATTTTTGACCTGAGAAGA  
AGAGTCTATAAAACTTCTTTTACACTTCACTGGTTGCCATGACGTCTCTGTTATAGTTTAAACATAGACCTTGGA  
TATATTCACCCCTCCCTTTTTTTTTTCGCTGCCTACTATATCCCAACTTCAGGTTAGGTTTTTAATGAATGGGC  
CTTTAAAGCATTAACTTATATATCACTGCTTTATCCTGAGTAGTGAAATGAGAGTGATGTCAGCACCTGTC  
CTGCTCCTAGGCTCTTTGTGCAGTAACCAGTCTCCTAGGCTTGGTTCTTGACCATGATTGACTCTGAAAGAGC  
TGGCTTGAGCCAGATTGAGGCAGCTTTATCTGAGTTGAATGTGGAGGATGCTGCTCACTTGACTCCCGCTCTC  
GACTTTGAAGGCGCCCTGCGCGAAAGACTCCAATATACTAGCGTTGAGCTCTACGCTGTTGACGGCGACGGCA  
TGATCCGCGTCCCGGCAGTTCTCTTCTGTGGTGATGCAAACAAGGTATCTACTCTGCTGCCTTTTTGTTTTTT  
TCTCGAGTATTTGGGCCACATAGACGCGCAAGGCCCTTATTATACTCACTTTGAGCAATAGGGGCTTCCAGGGA  
TCATCCTTACTCCAACTACTCCATCTGAACCTGAGACTCCCAGCACGGTATCATCTTCGCCAACATCGCTGGA  
ATCACCAGCAATGCCCTCCCTGCCGTGCGCGATAACGCCGCCCTCCCACTCCACCAGGGTTTTGAGTTCAA  
AACATACTGAACGGTACTTCTTTGCCATTGCTGCACGCGCACTCCAGGAGGCAACAAAATTACCTGAACAAC  
CACCACCAGCTGGCTGGCTACCTAGCCAGAAATGCCCTATCTTCTATTCTTCGATACTTGACCAATTTACTGT  
CTGTTTCCGCGAGAGACTCCAAAGCCTAGGCCGCTACCAACAGGACACATTCATTGAAGAATGTCAACATCAC  
TATGTCAGCATTTTCAACAACATCCGCTCTAGATGGCATTACTCCCCGTTGGGCTCGATTGATGGTTTTAGAA  
CTACCATCAATACTCCCAACTGTGCAATTGCTGTCCAAGCACTGCAACACGCAGTCAGAAAGCCGACTTCCCC  
TCCGCCAGCTAACTGGAAGGTCAACGATCCCTTACACACATACTATGTTATCATGATTGCTAGGTTCCGTACC  
CATCTGCGCAACATGCTGAGGAACTACGACTCCCTCTTGATCGATGAACCAATTGATATCCACGAGTCTACCT  
GCCGATTCATCGAGTTAGTTATTCAAGAGTACCGCCGCACCTGGATCACAACTACGGGCTAGAGTGAAGGAG  
TAAATTGTCTGTTTCAATTATCTCTTAAACCTGTCGAAAGGGGTTAAACAAAAAAAAAAAAAAAAAAAAAGAG  
TAAAAGGAATAAAAGGAGGCTCATGCATGTGAATAAATAGACGCGAGTAACAAAGTTCAATAGCCGCGATATG  
AAGTCAAGCTATTACGTCACCACAAGAGCAAAGCCCAACCTCGTAGTTAGAAACAAGCGCTGCTTCACCTTCA  
CCAACGCCATCCCTTCTACGCATCTTCACTCAGTAGTAGCTAGGCGACAGTCTATCCTTCGTTCTCGAGTAC  
TTTAATCTTCACCTGCGGCTCGGGGACGCTCGCATATATCTCTGAGCCCAAGAAGACGACTTCCAACCTCGCG  
CCCCAACTGCGATCCTGAAACACCCGACGAGACATCACGGAAGCACCGCCCTCGATCCACCGGTCCAAAT  
AAACGCATCTACGTCACCGTATCCCATGCCGACATTGATAGAGTGTTGCTGAAATGAAGGGTGAAGCGGG  
GGAAAATATTGCGGCTCTATGCGACAGTTCCGGAGCCTAGTAACTCGGCTCCAGAGTCGCTATTCAATGAC  
TCCTCTTCTACGGGCAGTGTAGCAAGCGCTATGCCTAGCTCTCTGCCGGCTCGAAGAAGCCATGGCCTAGTCA  
GGACGAGGTCAGACCCGTTCAAGCCGAATACTACGACAACTCTCTTACCTCAGTCTGAGAGTGACTATACTCA  
GCGTATGGGGTACGTTTGCCTGGGTCAACCCGACAGGAAAATTGGTTAGCGAACTAACAGACAGTTCCTTTTT  
GTTATGATAGAAATTCGATGGGCTCCGTTGAATATCAGTCTTAAACGGCGGCTCCAGACCCTCGTCGCTCCTT  
CATACCATTTGATCGCATTTTGTCTGATGTCTTTCTTTTTCTGCTGCGCCATCCCTTATTCTGGCCCATCC  
TATCCCATACGTGGTTTTACATATCACTGTTTTCCAAGGCTGCCACAGATGGAAGACTTCAAGGAGAAGTAA  
CTTCATTGATCCCTACCCATATGGAAGCTTTTTGGCTCGTACTTCCCGGCTCGCCTTCACCGAACAGTCCTC

TCCCACCAACTAGGAAGTATATTTTTGGCTACCACCCACATGGGATTATATCACATGGAGCATTTCGCGGCTTT  
CGCTACTGAAGGGCTAGGCTTTTCAAAGCTCTTCCCGGAATCACAAATACCCTACTTACCCTGGACTCCAAT  
TTCCGACTTCCTTTCTACCGAGACTGGGCATTAGCAATGGGATTAGGTAGCGTATCCCGTGAATCCTGCGAAA  
ATATCCTTTCAAAGGGTGAATGAATAAGGAAGGCATGGGCCGTGCAATTACCATTGTGATAGGTGGTGCACG  
AGAATCTCTTGATGCCAGCCGCATACCCTCCGATTGATCCTGCGCCGACGAAAGGGTTCGTCAAGCTTGCA  
ATCCGCACTGGCGCAGACCTTGTTCCCGTACTCGCATTTGGTGAAAACGAGCT
