# Supplementary material for: Two different types of tandem sequences mediate the overexpression of TinCYP51B in azole-resistant Trichophyton indotineae
Source: PubMed Central journal article supplement (PMC10648874; doi:10.1128/aac.00933-23), 2023-10-12
Supplement: aac.00933-23-s0003.pdf [file aac.00933-23-s0003.pdf]

**TinCYP51B locus in TIMM20123**

[Read No.m64281e\_230311\_112734/12322574/ccs] [Sense (+) strand]

~TAT (Upstream sequence of the 7374 block)

AAT~ACC (5'UTR)

ATG~TAG (*chkB* protein kinase genomic DNA) (Forward sequence)

ATG~TGA (*TinCYP51B* gene) (Forward sequence)

TAA~GCT (3'UTR)

CTA~CAT (*FYV4* genomic DNA) (Reverse sequence)

GAAGATAGCTTACTTGAAGTTCGGATCGAAGATTCCTTGCTTGCACGAATGGTACGTTCCCATGCCTGCGCT  
ACTTCTACCAATATTCTGGATTCATAGCTGGTTTTTCATTGATAACTCCTAGCCACAGAGCAATTCCCATCC  
TGATGGACTCCTTGGTAAATATCTGGAAGGGAATGCTGACTAGGTAAGCAATAATTGCCGGATGGCTATCATC  
AGTATTACACAAGAGAGCAGCAGTGC GGCGGAGAATATGCCGAGGAAGATCCAGCGAGATATGCTTCTCTGTT  
CTAATTTGATGCTCGAGAGCTGCGAGAGCTTCTTGTACAGTGT CAGGGTAATCAGTCACCCGGGCGGTGGTGC  
TTTGACCTATTGAAGATATTAGAAGGTTGGTTCAATGGCTCAAATCAGACATATAAATACCATAGGATATCGC  
TAGAGGAGACTTTCCTCTGCGAGCTGGGGCGGCTTCAGAGTACCGGTACTCTTGTGAGTGGTATACTGAGAA  
ATGAAGTCGGAAGCAACATTGAGAACAGTGCCACCTGGGTTATCAATTGATCCTATCAGCTGTTAATGAAAGC  
TCAGAGCATAAATATTGATATAAGAACTGATATACTAGTCGCTGGTCGGCAAAGGGATTGCTGAGCCCAT  
CTCAAGTGCTAACGAACGGCCCATGTTTTATATTGCCGTACACGCCATCATCATCGTAATCAGAAAGGTACGTC  
TATGAAAGAACATATATTAGTGAAGTTGATGGCATCGGTGGGAATAATAACTCACCTGCAGTAGCCCTTGATA  
TCTAATGGTGCGATGTT CATAACATTTGAGATCCAAGTGC GCGCTGAGTTATGGAGATTCTTCAAGGTACGTC  
TCCTGAAATCATAATTGTCTGATAAAACAACCTGGACCGTCCGCCTGCTCGATGTGAAAGTAGAGTTCCATGC  
AAACTCATCCATTTCTCGTCCATGCACGATGACCAGAGCAAAGTAATCAAATCAAGCAGAGTAAACAACGAG  
AGTTTCTGGCAAAGTGCTGACGGGCATTGCATGATTATCTTATTTGCAGCTAGAGTAGCAGTTTGTGGACTT  
GGATGATACGATGGCAACAAGCAGTAAAAGTATCAGCTAGCTGTTTTGGCAATATAAGGGGCCGAGAATTTAC  
GGATGTGCTTCGGAGAGTTTTCTCAAGGTAGACGGTCACAACCTTGTCCGCAATTGCTCTCATGCAATTGCC  
ATTTCCGAGGCACCCAAGGTTGGGTGCGAGGAAGTATGTGAACACTTTGGTGCAATCACCAGAATTGGCACGGA  
GGGTTTCTATGAGTAGCGTTGCATTGAGAAAAGAGCGCCTTGGGGTAGTTCAGGCGTCGGATATCATGTTCTTG  
TGCCGGCAGTTCAGCAGTCAGTTCTTTTTCTTTTCAACGGTTGTCTGAGGGCTCTGGCCGCGTCTTAGAATT  
GTATTTAATTCAATGTC ACTCTCGAGCAGTTCAGCACGGTTCTCGGAGACTAGCGGAGGAGAATGTTCCGGCGA  
GGATACGTAGTTGTTCTGATGTTGCGCTTTCCAAGCTCTGAGTGAAGTGATATATCATGGGCTGCGATGTTGAA  
CCACGCATCCCGGAGCATATCTGTGATATCATCATCGTCACACACCCCAGAGGCTAATTGATCTAAGCGGCCT  
GCCCGGGCTAGTAGTATAGCAAGAGGTTTTCAATATTGGGGCAATTTGTTTAGCAGTTGCCTCAAGATCCTCTG  
GATGAACCTTTTCGCGTTTCGACCGCAGCTCCCTGGTTAACTAAGCTCTCGAGGAGGAACACAAGATAAATCTT  
GAAGACTTCACTGTTTTCGGTCGAGGTTGGCTGCAAGGTAATTTCTTGTCTTGTGTATCTATGTATACGTTAGA  
ATTCCCACTGACAAGGTCGAACAGCTAGATGAAAGGGGGCTTGGACTACATACCGCCTCCAGCATGAGGTTA  
TTCCCTGAGCAACAGTATCTCGCAGTAGACGAGAATAGAACTTTAGCAAGAGACGGAACCTCCGAGGCTCAC  
TCTTCAGCGAAAGAGCCGCAGTCTCCTGGATAATGTATGCATCAACTATGACATTCGCCTTGCCAATCTTCTG

CACCAGAATGGACTGTGCAAGGGCAACGATCTTGCTATCTTCACTATAAGTGGCGATTGTTACAATGGCATGT  
ACCACATTTCTAGCTGTGACGGAAGTATCCCCCTCCCCATCAATAGCAAGGGATAAGAAGCTCTCATTCGTGG  
GGGAGCACGGTTCTCTATCGAATGAGAATAGCCAGTGCCTGACTCGGCAGTTAGAGCGGTGGCAGCCTTATC  
AGCTGCCGATCCGGAGCTAAGGACGTTTCCGAGAGAATATAGGGTGCCTATGACGGTATCTTGGGAAAAGAAGC  
CGGAGGTTCTGGGCCAAACATTGGGCAGCCAGTGCACGACAGGACTGCTTTGGCCATTTTGGACAATGAAGC  
GAAGAAGAGAGCGGGTTAGGCCGTTTGCCTGACTGCCTCGGGATAGCCTTGCTAGAATGACAGCAGCCTTAAGGAC  
AACGGTAGCTAGGTCCTTGTTCATCATTTGGTCTGGATCTGAAATGGTATTGTCCAGGGATGTGAAGAGCAGG  
TCTAGATCCACTGAATCCTGGTCAACCATGATGCAGTTGATCGAGCACATTATCGACAAAGCCTTGACCAAGA  
ATGCAAGGCGTTGTTGCCAAGTGGAGCTGACTTGTAGGTAATCCGACTCTTCTTCGAGGAGATTGATCTGGTC  
ACCCGCGATTTCTGCGGCGTATTTTACCAGGCTAATCATCCCGCGGTCTGAGGCTTTAGCTACATAACCACTG  
TCTGCATATCGGGAGAGAAGGGTATCATCTGGCAGCGGTGGGGTTTGTATCATTTTCAACAGGAGATGTGCAGG  
ACTTTAGAAAAGCCCATGAAAAGCCTGTTGTAGCAACATGGAGCCAAGGGTTCGTCCGTCAGCCGCATACTGGCG  
GGTGTACCGTCTCCAGTCGTGCAGCAGAGGATCTGGAGAGCGAGAGTTCCGTATGCCGGAAGAGATGGTCTCC  
ACAGCTACCAGGAACCGCTCTGATAGAATGATGTGTAAGTCTTTACAATAGCAAGGCGATCCAGCGGTGCC  
AAAAATGGGGGAATTCGGACGAGGCCCGGAGAAATCCCACTAGCGATACCATTAGAGTAGTCACATCCGTAGA  
TTCATGGCTCTCGACCTGTATCCCTGTCCCATCTGCATCAAAAACGGCCGGCAGGCGGTCTGTTGCCTGGTGA  
CAATTCTCCAAGTACTCGTCAATGGCTTCGTGGACGTATCCTGCAGCGACTTGTGCCTAGAGCCCAGTAAA  
GCAACGCCGTAACCACATCATGGGTCAAGGTCTCCACGGCGAGGGTTTGTAAATATGTAGGAAAGGAGACGA  
ATGGATGCGGAGCGTATGGAGCGTAAGCAGGTATCCGACCAGTAGAGAAACCAGCTTTGCAGCATGGTCACCA  
CGCTGAACAGAGCCAGCTGCCTTGACACAGAGCAAGCAGTACGTCTAGTTCTCGAACCCCTATCTTCCTCATT  
AGCCACTTTTCTCGCGCATATGCCATTGAAGGAGGGGTGTGTGTATGTATTGAGGCAGTAAAAGGGGGGGGCA  
GTACACTCGAGGCGCAGCGAGCCTGGGAGCCACTGGAAGCCGCCTTGGAGCCATTGCAGGCACTTATGAGCCT  
CTCGACGTCTGAATTGCCCTGATCATCGTCTGCCGGGGTGTGTTTGTGGCTAGTATCGCAAGTTTCTCGAGC  
GCCGCACGCCGGATATACGATGGTGAATGATGCCTGAAGCTCTCCCCCGGCGGTTAGTTAGCAAATGTCTGCG  
CCCAACGTAGCACCAACACAGGGCGAGAACACCTACATATCCGGTCAACCAGCCTCGCCGTCATCCAGGAGGC  
CTTTCTTTTTCTGTGGTTCCAAGGGGTGGGGATGCACCGAACGTGCAGTCGTGTGTTTTGGGGGCGTGGTCAGG  
AGTGTATCAGAAAGTGTCTGCTGCTGGAGATGCGAGTCGCTGGTAGGATCAACCCGCCAAGCCGAGGCCCGT  
TTAGTGACGCCGGGGCAGAGAAACGACTGGGCAGCAAGACGGCAAAGCGAGAGAGATGCATGAAAGGGCATT  
TGATACACTCGATACGGACGCAGCCAGGGTTGCCAACTTGTGTAATTAATCTGACAAAGCCACTCTTCCTCTA  
CAGGGTTTTTCTCTTGCCTCCGGGCTGTCTGTCTCCCGGGGGTTGAGCCCGCTACATGCAAGCCAGG  
CATTGAAAAACAGTCTGCGCGAGAAAACCTCGATGATCGACTTTTGTGCCTTAGGCTATGATACGGAAATGCT  
TTTACAAGATAGCTGGATATTTGCATCCAAGCAGGAGTTGAAATAACACAAAGTGACGAAGGCAAAAAATAAT  
AAGAACTGCGGGATGCGGCTCTAACGGGCGGCAACCTTATAATAAGAGCGACTTCGCATCTTTTCGACAGAA  
AAAAAGGTTCGAGCAAGGGAAGTTCGCTCAGCCTGGCCTGCCATTGACTCTAAGCGCCGTCGTTCTCTTGCTT  
GGGGCTTGCTGCAGCTTGGCCTGGGCTTGTCCGGCCTGGAAGTTCAGGGAGCCGAAAGATAACTAGTTATTTA  
TTTCGTCTCCGCACACCTCGGCGGCTGTCTCATAGTCGGGATATACATAGTACGGGGTAGCAGGTAGACTCAC  
ACGCTGCCTCTCTGCTGAACTGCTTCTACCACCTTCGACAGCGACACTGTTCCGGTCTTGCAACTACGGTAG  
AGTGTGTTGGGGCTTGATCTTGCCTGCCATCGACTTGGAGTTGAAGTTGCGAAGCCATTGGCAGTCCATCCGG

GATATTCGTAAC TGCCGTCAACTTCTTCACGCCGGGCCAAAAC **ATGCCTCCGCAGAGGGAGAGAAGCAATCTG**  
AAGAGAGAAAGGGTAAGATATGAACACGTTATATCCAATTAGTTTCTCAGAAGGATGAAAATATTCAAGCTGC  
TAACTTCTTTCCCAAACCTGCAGGGCAACGCAGCTCCAGACCATGAATCAAAGAAGCCACGGAGATCTCCTCG  
AATCTCATCTCAATTGCAGCAGGATGCCGATATCTACCTTCTCCCCTAGCTAATGAAGTAATCTCAGAAGAA  
AAGCGTGAAGTTGCTACAGTTTCTCCCCAGAAGGCCGCCGAAACCAGGCGCTCGAGGTCAATCGCCAGACG  
AGTCGTCATGTCCCACCCAGGGTTTCTCTCAGTATCCCCAATCCAATCCATTGACGATGTGGAAGACGAGGT  
GGCCAGGGCATATGGGGATATCTTACTCCGCTAGATAACAATTTTGGAGGCCAATTGGTTCTGAAGAAGCGG  
GACAGCACAAATACTACACCGTAATTGGAGCAGCATCAGACATATCAACGCCGAAAGCAACGCCTCAAAC  
GTGGAAGTAGAGAGATAAACCGCGCTGGATATCTTATAGGCCGGCATGCAGAGTGCGGTATGCCTTTACCCAT  
TGCATACTCTCTGCCGTCTAGTGATCAATTGCTAACCATCTGGGTACTGCAGATTTTCAGGATCAAGCTCCCCA  
CGATATCCAACCGCCATTGCCTGATATTCCACGAAAACAGGGGAGGAGACTTTTGTGCAATTGTGGAAGATCT  
CTCTATCAATGGCACTTTTCATCAACGACGCCATCATCGGCAAGAACAACGCCGAGAGCTCGAAAACGGCGAC  
GAGATTACCATCCTGCAAGAAATCCAGATTCATCTTCAACTACCCGCGGAGTCGGAACACAAGCAAGTTCCGAC  
AGCAGTATAAGCTCTTTGATATGCTGGGTAGGGGACACTTTGCCTCGGTTTATCTATGCGCTGAACGTTCTAC  
GGGATCAAGTATGCCGTCAAACATTTTCGAGAAACGCCCGGGCGCAGTTTCAGAGGCTAGACCGTGAAGCACTA  
CAGCAAGAGATTTCAATGCTGATGAGTGTCAACCATCCGAACATGCTGTGCCTAAAGGATACCTTTGACGAGA  
GCGATGGTGTCTTCTGATTCTTGAGCTTGCGCCAGAGGGCGAACTGTTCAACTGGATCATTAGGCATCAGAA  
ACTCAGCGAGGAGGAGACTCGAAAAGTATTCATTCAGCTTTTTGAAGGTTTGAAGATACCTGGTATGTCGTTCCG  
TTTTCTGGTTGATCAGACTCATGGCAGTGTATATGGCTAACGTTGTGCTAGCATGAACGAAACATCATTAC  
CGTGACATAAAGCCAGAGAACATTTCTGGTTGTCGACAAAGATCTTACCGTAAAATTAGCAGACTTCCGGCCTTG  
CAAAGATTGTGGCGAACACTCCTTTACCACCACGCTGTAAGTTACCTACCTTCTGCCGTTCAAATCTGGGG  
TCAATCTTACTAAGAGATCATAAAATCTAGATGTGGAACGCCTGGCTGTAAGTTTCCCTGCTGCTCTGTTAAC  
GCTGGTGTCTTTCATCCACCAAATGTGAATCTAACAATTTCTTATCAGATGTTGCTCCTGAGATACTGGCAGAAA  
ACGCTGAAGCCAGAATGTACACCCGAGCGGTTGACATCTGGTCACTCGGAGTGGTACTCTACATCTGCCTGTG  
CGGATTCCTCCTTTCTCAGATGAACTGTACCACCAAGAGACTACCCATACACTCAGAAAGAGCAGATCCAG  
CTCGGAATATTTAAGTATCCTCTTCCATACTGGGACTCAATCGATTATAGAGCCATGGACCTTATCGACTCCA  
TGATCGAAGTCGACGTGAAGGAGCGTTTGAAGTAGATGAGTGTCTCCAGCACCCATGGATCACTGGCATCGA  
CCCCGATGAGCCTAGGGTGGCAGACAGCACCGATGACCTAGCCGGGGCCATCGGTGGCCTGAGGGTGTCCAAA  
GAACGCCGGCCAAC TATGGTCCGCAGGCTGTTGAGTGACATACATGAAGTCACGGTCAAGCAGGTGGTGAAGA  
CCAAGGAAGACGACCCTGCTTCCCAGGACATAACTATATAACCAGAATCATCCTGTGCCTCGAGCCCAGGAGCC  
CAAACCGGCTGGCAACCGGAACTCAAAGGAGTTCATGGAAC TCGGTGGAAGTGGAGACCAGGTGTTATTCGAT  
GAGCAGTCTGACGACTCGCTGGAGCTTGAGAGTGAGGCACGGAAGCCAGTTGTCCACCAAGACGACGCAGACA  
AGACTCCACGAGAAAGAAAGAGG**TAG**CAGAAGCCCAGTCCGTCTTGGGATGGTATTCTGCTAGCTATACCGTG  
CTATTCCGGACTTTTGTTCCTTTTTCGTTTATATTGATTGTGATCTTTCTTAATTTTTTCTTTAAC  
TATACCCCCCGTTGAAAGGTGATAGGGGGCCAACTAACCGAAAAGCAGCAGAAAAACGGGCTTGGTGCCTG  
CCTTGGAGACGACGGCGATTCTCGTGTTTAGGATTTCATTTTTGAAGTATATAACTATGGGTACAATAGCGTC  
CACTGGGCAATGTAATTACAGTCTTCTCACTACCACCGGACAATAATAACAATATTAATATTGACGGACC  
GTTGATAGCTTAACCTGCCATGACTAAGCCGGCCTCCCTGAAGCCGCGATGGCCTGATGATGCGCCCACCGTC

AGGTCTCGCTCGCTCAGGCAGCAGAGAATCCAGCGGAGGAGATGACGCCCTGCACGAACACCGTCCAGGGACC  
GTCTCCGCCCGTTCGCGAGCTCGAATTGTAATCATCTCGACGGCCGTTGGCCTGCTCGCCGCAAGGGAGAAAA  
AGGGGGCAGAAGGGCAGCGGTAATTTTGGTATTGGAGATGCAGCTGTAAACCAATAAAAAACGACGTAAAT  
ACCAGGAACAATGCATTATCTTACAGTACCGTACGCCCTTGCATAAAATGCGAGTTCGATCTCAAGATGCAA  
CTTTTTTTTTCCCTTGCTTCGTCCGCAGCAGCTTCAAGGCATTTCATCACAAACAACGAACAAGTCTTGAGCGG  
AAGCAGGAGGATAAGACGATCACC**ATGGGCCTCTTAGCCGACATTGTCTCTCGTTTCTGCGAGA**ACTGCTCGA  
CCCTGTCCACCGCCGCGCTCGTCGCAAGTGCCGTATCGGCTTTTATCGTCCTCTCCATTGTTATCAACGTCTCT  
GCAGCAGCTCCTGTTCAAGGACCCTACAAAGCCTCCGGTGGTCTTCCACTGGGTTCCGGTCATTGGAAGCACG  
ATCTCCTATGGAATTGACCCGTACAAGTTCTTTGACGACTGCAAGGAGAAGGTTAGTTGGTGCAATTCAACTT  
AGCTATATAACCAGGTTGCGCAAAGCTAACGTATAAATAAATTCGGTACTCTAGTATGGAGACATCTTCACATT  
CATACTGCTGGGCAAGAAGACGACTGTTTTTCTCGGTACAAAGGGAAATGATTTTCATTTTGAACGGCAAGCTC  
AAGGATGTTTTCGCGGAGGATGTCTACTCCCCCTCACCCAGTGTTCGGACGACATGTGGTGTATGATT  
GCCAAACTCCAAGCTCATGGAGCAGAAGAAGGTGTGTACAGCAATTTATTCCCGTCTACATCTCCTGGGCCT  
CCATTGCTAATTTAATCGTCTACCAGTTCGTCAAGTTCGGCCTCACCTCTGAAGCTCTCCGATCCTATGTCAC  
CCTGATCACCAAGGAAGTTGAGCAGTTCTTCGAGTCTCCCCGTCTTCAAGGGCGACTCCGGAGTTTTCAAC  
GTCAGCAAGGTCATGGCTGAAATCACCATCTACCCGCTCTCGATCTCTACAGGGCAAGGAGGTGCGAGGAA  
AGTTCGATTCCAGCTTTGCGGAACTCTACTCCGATCTCGACATGGGCTTCGCCGCCATCAACTTCATGTTCCC  
ATGGTTCCCCTTCCCACACAACCGCAAGCGTGACCGTGTCTCAAAGAAGATGGCCAGGTTTACACCGACATC  
ATCCGTACGCGACGTGAGGCTGGTGGAGAGAAAGACTCCGAGGACATGGTATGGAACCTTGATGTCTCGTCCGTGT  
ACAAGAATGGAACGCCAATTCCAGATATCGAAGTCGCCACATGATGATTGCTCTTCTTATGGCTGGCCAGCA  
CTCTTCTTCTCCACCGCTCCTGGATCGTTCCTCCGCCTTGCCAGCCGTCCAGATATTCTCGAGGAACTCTAC  
GAGGAACAGAAACGTGTTCTCGGCGAGGATCTTCCACCCTCACCTACGAATCTCTCCAGAACTTGATCTTC  
ACAACAATGTAATCAAGGAGACTCTCCGCTCCACGCTCCCATCCACTCTATCCTCCGTGCTGTTAAATCCCC  
TATGCCCGTTGAAGGAACTAACTATGTTGTCCCAACCTCTCACAACCTCCTTGCCGCTCCTGGTGTTCCTCA  
CGAGACCCTCAGTACTTCCCTGACCCTCTTGTTTGGAAACCCTCACCGATGGGAGAACAACGTCGGTGTACCG  
TAGTCGAGGCCAGTGAAGAAAAGACAGATTACGGATACGGTTTGGTTAGCAAGGGTGCCAACAGCCCTTACCT  
CCCATTCCGGCTCAGGCAGACACAGATGCATCGGTGAACAATTTGCATATGTTTCAGCTTGGAACCGTAACAGCT  
ACGTTAGCCAGACTAATGAAATGGAAGCAAGTTGAAGGCACCAAAGATGTTGTGCCGCCAACTGACTATTCCG  
TAAGTTTGGCATATTACGCTCCTTTTTTATTTTGCTCGATTTTACTAACTTTGCATTAATAGTCCCTCTTCTCG  
AAGCCCCTTGGCGACCCAATGGTCTCGTGGGAGAAGCGAAAGCAGCCTTCCCAGAAATGA**TAATCACGACTGC**  
**GGATTGAATCATGTTAAATTTCTTGCTTCTTGCTAATTTATTTCTTCTTTTTCTTACGTTTTATACACCGAGC**  
**CATATTTGCACTTTATGGTCACGCAAATAGGTTTTCGGAATAGAGCATATGTAATAAAAACTTTCTTTTGACC**  
**ATGCTTTTGAAGATGGGGATGTAGATAATAGTATTATTCTAATACAGCCATTTATTACAATACTCTAGATGA**  
**ACAGGAAAGTTGCAGTTACTCCGTTAGCTTTGGTGCAGAAACAAAATGGTAATATACATTGGAATAGTACAT**  
**CTTCCCGTAGCTGGGATAATCTAGCATCTAAACAGCGATATCCAAGCCAGTAATGTCAGGAAGTAACCAGCCA**  
**GCAACGTCGTTAATCCCGTGCCCCCTTCAACTCCGACGCTACAAAACGC**CTAAGCAGCTGCCTGAGCATTCC****  
**TCCTCTCCGCCAACGCTCTCTTCGCTCTGATCTCCTTCTGTCTTCTCTGACCACCGTCAATCTTTCTGCCACG**  
**CTTATGCTCCCACATGCCATCAGTAACCTGAACCTTGACGGCGGTACTCCATGTGTTTGGAAATAATCTGAGCA**

TACGGCCCCTTGATCATATTCCCGTGGTGCAATTTATAATGGGCAAACCTTTTGGAGTGGCTTGGAAGTATCCT  
TGAGCTCTGTTTTCGCCTGGTGGTAGATTGACAATCGCATAACGCATTCCAGGTGTAAGGGTAGCGGTGCCCAT  
TGTGCTAACATCTAGGGACTCTCCGTCGGTGGCATTGGTAGTTTTTGCACCTTTTACTTTTCGACGGGGACC  
TCAACAGCTCTCAGCTCAGCAACACCGTCAACAACGTTTTTCGAAATCACCTCCTGGGCCGTAGTCTGCTGTC  
TGAATTTCTCTCTCCACCGCAGTATGTATCGTCTGTCCCTTGTCAATTTCTATGCCCAATTCTCGAAGCTCAGC  
CGAGTCCGCTGTAAACAATTGCTTCCATCCGGTGATTTTGTCTGGAATATCTGGACATGTTTCGCCCAATTAGG  
CGTAGGAATGTTTCGACATCGGGCACGAATGGGGTAGGTGATGGCACTGTTGCGGGTTTTTCGAGATTGATGAA  
GGTACCGTACGCATGGCTGATAATGGGGGTTTTGTGACGGAAGTGAAGAGCCGTAGTGGAAGGGATGTTCTGGC  
ATTAAAGCCCAGTATGCGCGCCGACGC**CAT**AGTGGTTATATCGCCTTATATCAAACCGTTCAATGTCGAGATC  
TGGGGGGTGAAGATTTTAATTTAGCTCGTGGTGTAAAGAACCCATCGGCGGGCGTGACGAAAGCGAAAAAGC  
CACGGCACCAAGGGCCCAGGTAAACCGGTAAGGGACTCAAGGCGAGTCAATCCAATGCTCAATGGCGCTGTAT  
AGAAGATGTTCAACTGGTTCTTCGACTTCGTTCAAGATTTTGCACCAAAAATTTGAATTAGGTCCGACGGCCT  
TAGCTCGGATCAACAAAACGCCGATCTCCGGTGAGCTCGGGCCAGCCGAAGCTTCCATCGCAACATTCAAAGA  
TGAAAGACGACGATATATATTTTGATAACAAACAAAGCTGTATTGTTGATTGAATACTAGGAGAGCTGCTCAG  
AGCAGTGTCTCACTCTTGTGCCACTCTATCCTTTGTCTCGCGAAATTGGTGAAGCCAATTTGCTTGACATT  
ATGGCAGTGTGCGCGCTTCCCTCTCAATTCCTTCCCATCACTACTACCGGTGCTCCAAAGTCGTTAGCGATG  
AGAAATATTGCTTCTCAAGAGCCTCGACGGCGCCTAGTGGTATCCTGCAGTTCCTAAGCCCTCCATGCCCG  
AACCAGAGCTGGCGGAGCAGTTAAACGCTGATGTACGGCGGAAATATGTCAAAGGTGGGCGGGCAAATACACC  
CCAACCATTGGGACCCATAATGCTAACATTTGGTTATTCTGAAAGATAAGAAGCTCGGTGAAGGTACATATG  
CAGTTGTTTACCTAGGCCATCTACGAGATGATCCCACTTCGCTAATAAAGAGCGACTTCGCATCTTTCGACAG  
AAAAAAAGGTCGAGCAAGGGAAGTTCGCTCAGCCTGGCCTGCCATTGACTCTAAGCGCCGTCGTTCTCTTGC  
TTGGGGGCTTGCTGCAGCTTGGCCTGGGCTTGTCCGGCCTGGAAGTCAAGGAGCCGAAAGATAACTAGTTATT  
TATTTTCGTCTCCGCACACCTCGGCGGCTGTCTCATAGTCGGGATATACATAGTACGGGGTAGCAGGTAGACTC  
ACACGCTGCCTCTCTCTGCTGAACTGCTTCTACCACCTTCGACAGCGACACTGTTCCGGTCTTGCAACTACGGT  
AGAGTGTGTTGGGGCTTGATCTTGCCTGCCATCGACTTGGAGTTGAAGTTGCGAAGCCATTGGCAGTCCATCC  
GGGATATTCGTAAGTCCCGTCAACTTCTTACGCGGGGCCAAAAC**ATG**CCTCCGCAGAGGGAGAGAAGCAATC  
TGAAAGAGAGAAAGGTAAGATATGAACACGTTATATCCAATTAGTTTCTCAGAAGGATGAAAATATTCAAGCT  
GCTAACTTCTTTTCCCAAACCTGCAGGGCAACGCAGCTCCAGACCATGAATCAAAGAAGCCACGGAGATCTCC  
TCGAATCTCATCTCAATTGCAGCAGGATGCCGGATATCTACCTTCTCCCTAGCTAATGAAGTAATCTCAGAA  
GAAAAGCGTGAAGTTGCTACAGTTTCTCCCCAGAAGGCCGCCGAAACCAGGCGCCTCGAGGTCAATCGCCAG  
ACGAGTCGTATGTCCCACCCAGGGTTTTCTCTCAGTATCCCCAATCCAATCCATTGACGATGTGGAAGACGA  
GGTGGCCCAGGGCATATGGGGATATCTTACTCCGCTAGATAACAATTTGGAGGCCAATTGGTTCTGAAGAAG  
CGGGACAGCACAAATACTACACCGTAATTGGAGCAGCATCAGACATATCAACGCCGAAAGCAACGCCTCAA  
AACGTGGAAGTACAGAGATAAACCGCGCTGGATATCTTATAGGCCGGCATGCAGAGTGGGTATGCCTTTACC  
CATTGCATACTCTCTGCCGCTAGTGATCAATTGCTAACCATCTGGGTACTGCAGATTTCAAGGATCAAGCTCC  
CCACGATATCCAACCGCCATTGCCTGATATTCACGAAAACAGGGGAGGAGACTTTGTTGCAATTGTGGAAGA  
TCTCTCTATCAATGGCACTTTCATCAACGACGCCATCATCGGCAAGAACAACGCCGAGAGCTCGAAAACGGC  
GACGAGATTACCATCCTGCAAGAATCCAGATTCATCTTCAACTACCCGCGGAGTCGGAACACAAGCAAGTTC

GACAGCAGTATAAGCTCTTTGATATGCTGGGTAGGGGACACTTTGCCTCGGTTTATCTATGCGCTGAACGTTCTACGGGGATCAAGTATGCCGTCAAACATTTTCGAGAAACGCCGGGCGCAGTTCAGAGGCTAGACCGTGAAGCACTACAGCAAGAGATTTCAATGCTGATGAGTGTCAACCATCCGAACATGCTGTGCCTAAAGGATACCTTTGACGAGAGCGATGGTGTCTTCCTGATTCTTGAGCTTGCGCCAGAGGGCGAACTGTTCAACTGGATCATTAGGCATCAAAACTCAGCGAGGAGGAGACTCGAAAAGTATTCATTCAGCTTTTTTGAAGGTTTGAGATACCTGGTATGTGCTTCGTTTTCTGGTTGATCAGACTCATGGCAGTGTATATGGCTAACCGTTGTTCGTAGCATGAACGAAACATCATTACCGTGACATAAAGCCAGAGAACATTCTGGTTGTTCGACAAAGATCTTACCGTAAAATTAGCAGACTTCGGCCTTGCAAAGATTGTCGGCGAACACTCCTTTACCACCACGCTGTAAGTTCACCTACCTTCTGCCGTTCAAATCTGGGTCAATCTTACTAAGAGATCATAAAATCTAGATGTGGAACGCCTGGCTGTAAGTTTCCCTGCTGCTCTGTTAACGCTGGTGTCTTCATCCACCAAATGTGAATCTAACAATCTTATCAGATGTTGCTCCTGAGATACTGGCAGAAAACGCTGAAGCCAGAATGTACACCCGAGCGGTTGACATCTGGTCACTCGGAGTGGTACTCTACATCTGCCTGTGCGGATTCCCTCCTTTCTCAGATGAACTGTACCACCAAGAGACTACCCATACACTCAGAAAGAGCAGATCCAGCTCGGAATATTTAAGTATCCTCTTCCATACTGGGACTCAATCGATTATAGAGCCATGGACCTTATCGACTCCATGATCGAAGTCGACGTGAAGGAGCGTTTGAAAGTAGATGAGTGTCTCCAGCACCCATGGATCACTGGCATCGACCCCGATGAGCCTAGGGTGGCAGACAGCACCGATGACCTAGCCGGGGCCATCGGTGGCCTGAGGGTGTCCAAAGAACGCCGGCCAACCTATGGTCCGCAGGCTGTTGAGTGACATACATGAAGTCACGGTCAAGCAGGTGGTGAAGACCAAGGAAGACGACCCTGCTTCCAGGACATAACTATATACCAGAATCATCCTGTGCCTCGAGCCAGGAGCCCAAACCGGCTGGCAACCGGAACTCAAAGGAGTTCATGGAACCTCGGTGGAAGTGGAGACCAGGTGTTATTCGATGAGCAGTCTGACGACTCGCTGGAGCTTGAGAGTGAGGCACGGAAGCCAGTTGTCCACCAAGACGACGCAGACAAGACTCCACGAGAAAGAAAAGAGGTAGCAGAAGCCCGATCCGTCTTGGGATGGTATTCTGCTAGCTATACCGTGCTATTCCGGACTTTTTGTTTCCAATTCCTTTTTTCGTTTATATTGATTGTGATCTTTCTTAATTTTTTCTTTAACTATACCCCCGGTTGAAAGGTGATAGGGGGCCAACCTAACCGAAAAGCAGCAGAAAAACCGGCTTGGTTCGTGCCTTGGAGACGACGGCGATTCTCGTGTTTAGGATTTTCATTTTTGAGTGATATAACTATGGGTACAATAGCGTCCACTGGGCAATGTAATTACAGTCTCTTCTCACTACCACCGGACAATAATAACAATATTAATATTGACGGACCGTTGATAGCTTAACCTGCCATGACTAAGCCGGCCTCCCTGAAGCCGCGATGGCCTGATGATGCGCCCACCGTCAGGTCTCGCTCGCTCAGGCAGCAGAGAAATCCAGCGGAGGAGATGACGCCCTGCACGAACACCGTCCAGGGAACCGTCTCCGCCCCGTCGCGAGCTCGAATTGTAATCATCTCGACGGCCGTTGGCCTGCTCGCCGAAGGGAGAAAGGGGGGCAGAAGGGCAGCGTAATTTTTGGTATTGGAGATGCAGCTGTAAACCAATAAAAAACGACGTAAAATACCAGGAACAATGCATTATCTTACAGTACCGTACGCCCTTGATAAAAATGCGAGTTCGATCTCAAGATGCAACTTTTTTTTTTCCCTTGCTTCGTCCGCAGCAGCTTCAAGGCATTTCATCACAAACAACGAACAAGTCTTGAGCGAAGCAGGAGGATAAGACGATCACCATGGCCCTCTTAGCCGACATTGTCTCTCGTTTCTGCGAGAACTGCTCGACCCTGTCCACCGCCGCGCTCGTCGCAAGTGCCGTATCGGCTTTTATCGTCCTCTCCATTGTTATCAACGCTCTGCAGCAGCTCCTGTTCAAGGACCCTACAAAGCCTCCGGTGGTCTTCCACTGGGTTCGGTCAATTGGAAGCACGATCTCCTATGGAATTGACCCGTACAAGTCTTTGACGACTGCAAGGAGAAGGTTAGTTGGTGCAATTCACCTTAGCTATATAACCAGGTTGCGCAAAGCTAACGTATAAATAATTTCCGGTACTCTAGTATGGAGACATCTTCACATTCATACTGCTGGGCAAGAAGACGACTGTTTTTCTCGGTACAAAGGGAAATGATTTTCATTTTGAACGGCAAGCTCAAGGATGTTTTCGCGGAGGATGTCTACTCCCCCTCACCCACCCAGTGTTCCGGACGACATGTGGTGTATGATTGCCAAACTCCAAGCTCATGGAGCAGAAGAAGGTGTGTACAGCAATTTATTCCCGTCTACATCTCCTGGGC

CTCCATTGCTAATTTAATCGTCTACCAGTTCGTCAAGTTCGGCCTCACCTCTGAAGCTCTCCGATCCTATGTC  
ACCCTGATCACCAAGGAAGTTGAGCAGTTCTTCGAGTCTCCCCGCTTCAAGGGCGACTCCGGAGTTTTCA  
ACGTCAGCAAGGTCATGGCTGAAATCACCATCTACACCGCCTCTCGATCTCTACAGGGCAAGGAGGTGCGAGG  
AAAGTTCGATTCCAGCTTTGCGGAAGTCTACTCCGATCTCGACATGGGCTTCGCCGCCATCAACTTCATGTTT  
CCATGGTTCCCTTCCCACACAACCGCAAGCGTGACCGTGCTCAAAAGAAGATGGCCAGGTTTACACCGACA  
TCATCCGTGACGACGTGAGGCTGGTGGAGAGAAAGACTCCGAGGACATGGTATGGAACCTTGATGTCGTCCGT  
GTACAAGAATGGAACGCCAATTCAGATATCGAAGTCGCCACATGATGATTGCTCTTCTTATGGCTGGCCAG  
CACTCTTCTTCCCTCACCAGGCTCCTGGATCGTTCTCCGCCTTGCCAGCCGTCCAGATATTCTCGAGGAAGTCT  
ACGAGGAACAGAAACGTGTTCTCGGCGAGGATCTTCCACCACTCACCTACGAATCTCTCCAGAACTTGATCT  
TCACAACAATGTAATCAAGGAGACTCTCCGCCTCCACGCTCCCATCCACTCTATCCTCCGTGCTGTTAAATCC  
CCTATGCCCGTTGAAGGAACTAATGTTGTCCCAACCTCTCACAACCTCCTTGCCGCTCCTGGTGTTCCT  
CACGAGACCCTCAGTACTTCCCTGACCCTCTGTTTGGAAACCTCACCGATGGGAGAACACGTCGGTGTCC  
CGTAGTCGAGGCCAGTGAAGAAAAGACAGATTACGGATACGGTTTGGTTAGCAAGGGTGCCAACAGCCCTTAC  
CTCCCATTCGGCTCAGGCAGACACAGATGCATCGGTGAACAATTTGCATATGTTTCCAGCTTGGAAACCGTAACAG  
CTACGTTAGCCAGACTAATGAAATGGAAGCAAGTTGAAGGCACCAAAGATGTTGTGCCGCCAACTGACTATTC  
GGTAAGTTTGGCATATTACGCTCCTTTTTATTTGCTCGATTTTACTAACTTTGCATTAATAGTCCCTCTTCT  
CGAAGCCCCTTGGCGACCAATGGTCTCGTGGGAGAAGCGAAAGCAGCCTTCCCAGAAA**TGA**TAATCAGCACT  
GCGGATTGAATCATGTTAAATTTCTTGCTTCTTGCTAATTTATTTCTTCTTTTTCTTACGTTTTATACACCGA  
GCCATATTTGCACTTTATGGTCACGCAAATAGGTTTTCGGAATAGAGCATATGTAATAAAAACTTTCTTTTGA  
CCATGCTTTTGAAGATGGGGATGTAGATAATAGTATTATTCTAATACAGCCATTTATTACAATACTCTAGAT  
GAACAGGAAAGTTGCAGTTACTCCGTTAGCTTTGGTGCAGAAACAAAATGGTAATATACATTGGAAATAGTAC  
ATCTTCCCGTAGCTGGGATAATCTAGCATCTAAACAGCGATATCCAAGCCAGTAATGTCAGGAAGTAACCAGC  
CAGCAACGTCGTTAATCCCGTGCCCCCTTCAACTCCGACGCTACAAAACGC**CTA**AGCAGCTGCCTGAGCATT  
CCTCCTCTCCGCCAACGCTCTCTTCGCTCTGATCTCCTTCTGTCTTCTCTGACCACCGTCAATCTTTCTGCCA  
CGCTTATGCTCCACATGCCATCAGTAACCTGAACCTTGACGGCGGTACTCCATGTGTTTGGAAATAATCTGAG  
CATACGGCCCCCTTGATCATATTCCTGTTGGTGCATTTATAATGGGCAAACCTTTTTGAGTGGCTTGGAAATATC  
CTTGAGCTCTGTTTCGCCTGGTGGTAGATTGACAATCGCATAACGCATTCAGGTGTAAGGGTAGCGGTGCC  
ATTGTGCTAACATCTAGGGACTCTCCGTCCGTGGCATTGGTAGTTTTTGCACCTTTTACTTTTTGACGGGGA  
CCTCAACAGCTCTCAGCTCAGCAACACCGTCAACAACGTTTTTCGAAATCACCTCCTGGGCCGTAGTCTGCTG  
TCTGAATTTCTCTCTCCACCGCAGTATGTATCGTCTGTCCCTTGTCATTTCTATGCCCAATTCTCGAAGCTCA  
GCCGAGTCCGCTGTAAACAATTGCTTCCATCCGGTGATTTTGCTGGAATATCTGGACATGTTTCCGCCAATTA  
GGCGTAGGAATGTTTCGACATCGGGCACGAATGGGGTAGGTGATGGCACTGTTGCGGGTTTTTCGAGATTGATG  
AAGGTACCGTACGCATGGCTGATAATGGGGTTTTGTGACGGAAGTGAAGAGCCGTAGTGGAAGGGATGTTCTG  
GCATTAAGCCCAGTATGCGCGCCGAGC**CAT**AGTGGTTATATCGCCTTATATCAAACCGTTCAATGTCGAGA  
TCTGGGGGGTGAAGATTTTAAATTTAGCTCGTGGTGTAAAGAACCCATCGGCGGGCGTGACGAAAGCGAAAAA  
GCCACGGCACCAAGGGCCCAGGTAAACCGGTAAGGGACTCAAGGCGAGTCAATCCAATGCTCAATGGCGCTGT  
ATAGAAGATGTTCAACTGGTCTTCGACTTCGTTCAAGATTTTGCACCAAATTTTGAATTAGGTCCGACGGC  
CTTAGCTCGGATCAACAAAACGCCGATCTCCGGTGAGCTCGGGCCAGCCGAAGCTTCCATCGCAACATTCAAA

GATGAAAGACGACGATATATATATTTTGATAACAAACAAAGCTGTATTGTTGATTGAATACTAGGAGAGCTGCTC  
AGAGCAGTGTCTCACTCTTGTGCCACTCTATCCTTTGTCTCGCGAAATTGGTGGAAAGCCAATTTTCGCTTGACA  
TTATGGCAGTGTGCGCGCTTCCCTCTCAATTCCTCCCATCACTACTACCGGTGCTCCAAAGTCGTTAGCGAT  
GAGAAATATTGCTTCTCAAGAGCCTCGGACGGCGCCTAGTGGTGATCCTGCAGTTCCTAAGCCCTCCATGCC  
GAACCAGAGCTGGCGGAGCAGTTAAACGCTGATGTACGGCGGAAATATGTCAAAGGTGGGCGGGCAAATACAC  
CCCAACCATTTGGGACCCATAATGCTAACATTTGGTTATTCTGAAAGATAAGAAGCTCGGTGAAGGTACATAT  
GCAGTTGTTTACCTAGGCCATCTACGAGATGATCCCACTTCGCTAATAAAGAGCGACTTCGCATCTTTTCGACA  
GAAAAAAAGGTCGAGCAAGGGAAGTTTCGCTCAGCCTGGCCTGCCATTGACTCTAAGCGCCGTCGTTCTCTTG  
CTTGGGGGCTTGCTGCAGCTTGGCCTGGGCTTGTCCGGCCTGGAACCTCAGGGAGCCGAAAGATAACTAGTTAT  
TTATTTTCGTCTCCGCACACCTCGGCGGCTGTCTCATAGTCGGGATATACATAGTACGGGGTAGCAGGTAGACT  
CACACGCTGCCTCTCTGCTGAACTGCTTCTACCACCTTCGACAGCGACACTGTTTCGGTCTTGCAACTACGG  
TAGAGTGTGTTGGGGCTTGATCTTGCCTGCCATCGACTTGGAGTTGAAGTTGCGAAGCCATTGGCAGTCCATC  
CGGGATATTCGTAACCTGCCGTCAACTTCTTTCACGCCGGGCCAAAACATGCCTCCGCAGAGGGAGAGAAGCAAT  
CTGAAGAGAGAAAGGGTAAGATATGAACACGTTATATCCAATTAGTTTCTCAGAAGGATGAAAATATTCAAGC  
TGCTAACTTCTTTTCCCAAACCTGCAGGGCAACGCAGCTCCAGACCATGAATCAAAGAAGCCACGGAGATCTC  
CTCGAATCTCATCTCAATTGCAGCAGGATGCCGGATATCTACCTTCTCCCCTAGCTAATGAAGTAATCTCAGA  
AGAAAAGCGTGAAGTTGCTACAGTTTCTCCCCAGAAGGCCGCCGAAACCAGGCGCCTCGAGGTCAATCGCCA  
GACGAGTCGTATGTCCACCCAGGGTTTCTCTCAGTATCCCCAATCCAATCCATTGACGATGTGGAAGACG  
AGGTGGCCAGGGCATATGGGGATATCTTACTCCGCTAGATAACAATTTTGGAGGCCAATTGGTTCTGAAGAA  
GCGGGACAGCACAAATACTACACCGGTAATTGGAGCAGCATCAGACATATCAACGCCGAAAGCAACGCCTCA  
AAACGTGGAACCTAGAGAGATAAACCAGCGCTGGATATCTTATAGGCCGGCATGCAGAGTGGGTATGCCTTTAC  
CCATTGCATACTCTCTGCCGTCTAGTGATCAA

[Read No.m64281e\_230311\_112734/165807379/ccs] [Antisense (-) strand]

GGT~ATT (5'UTR)

CTA~CAT (*chkB* protein kinase genomic DNA) (Reverse sequence)

TCA~CAT (*TinCYP51B* gene) (Reverse sequence)

AGC~TTA (3'UTR)

ATG~TAG (*FYV4* genomic DNA) (Forward sequence)

CACATTTGGTGGATGAAAGCACCAGCGTTAACAGAGCAGCAGGGAAACTTACAGCCAGGCGTTCCACATCTAG  
ATTTTATGATCTCTTAGTAAGATTGACCCCAGATTTGAACGGCAGAAGGTAGGTGAACTTACAGCGTGGTGGT  
AAAGGAGTGTTCGCCGACAATCTTTGCAAGGCCGAAGTCTGCTAATTTTACGGTAAGATCTTTGTGCGACAACC  
AGAATGTTCTCTGGCTTTATGTCACGGTGAATGATGTTTCGTTTCATGCTACGACAACGGTTAGCCATATACAC  
TGCCATGAGTCTGATCAACCAGAAAACGAAACGACATACCAGGTATCTCAAACCTTCAAAAAGCTGAATGAATA  
CTTTTCGAGTCTCCTCCTCGCTGAGTTTCTGATGCCTAATGATCCAGTTGAACAGTTCGCCCTCTGGCGCAAG  
CTCAAGAATCAGGAAGACACCATCGCTCTCGTCAAAGGTATCCTTTAGGCACAGCATGTTTCGGATGGTTGACA



CTCATCAGCATTGAAATCTCTTGCTGTAGTGCTTCACGGTCTAGCCTCTGAACTGCGCCCGGGCGTTTCTCGA  
AATGTTTGACGGCATACTTGATCCCCGTAGAACGTTTACAGCGCATAGATAAACCGAGGCAAAGTGTCCCCTACC  
CAGCATATCAAAGAGCTTATACTGCTGTGCGAACTTGCTTGTGTTCCGACTCCGCGGGTAGTTGAAGATGAAT  
CTGGATTCTTGCAGGATGGTAATCTCGTTCGCCGTTTTTCGAGCTCTCGGCGTTTTGTTCTTGCCGATGATGGCGT  
CGTTGATGAAAGTGCCATTGATAGAGAGATCTTCCACAATTGCAACAAAGTCTCCTCCCCTGTTTTCTGTGGAA  
TATCAGGCAATGGCGGTTGGATATCGTGGGGAGCTTGATCCTGAAATCTGCAGTACCCAGATGGTTAGCAATT  
GATCACTAGACGGCAGAGAGATGCAATGGTAAAGGCATACCGCACTCTGCATGCCGGCCTATAAGATATCC  
AGCGCGGTTTTATCTCTCTAGTTCACGTTTTGAGGCGTTGCTTTCCGGCGTTGATATGTCTGATGCTGCTCCA  
ATTACCGGTGTAGTATTTGTGCTGTCCCCTTCTTTCAGAACCAATTGGCCTCCAAAATTGTTATCTAGCGGAG  
TAAGATATCCCATATGCCCTGGGCCACCTCGTCTTCCACATCGTCAATGGATTGGATTGGGGGATACTGAGA  
GAAACCCTGGGTGGGACATGACGACTCGTCTGGCGATTGACCTCGAGGCGCCTGGTTTTCGGCGGCCCTTCTGGG  
GGAGAACTGTAGCAACTTCACGCTTTTTCTTCTGAGATTACTTCATTAGCTAGGGGAGAAGGTAGATATCCGG  
CATCCTGCTGCAATTGAGATGAGATTCGAGGAGATCTCCGTGGCTTCTTTGATTTCATGGTCTGGAGCTGCGTT  
GCCCTGCAGGTTTGGGAAAAGAAGTTAGCAGCTTGAATATTTTCATCCTTCTGAGAACTAATTGGATATAAC  
GTGTTTCATATCTTACCCTTTCTCTCTTTCAGATTGCTTCTCTCCCTCTGCGGAGGCATGTTTTGGCCCGGCGTG  
AAGAAGTTGACGGCAGTTACGAATATCCCGGATGGACTGCCAATGGCTTCGCAACTTCAACTCCAAGTGCATG  
GCAGGCAAGATCAAGCCCCAACACACTCTACCGTAGTTGCAAGACCGAACAGTGTGCGCTGTGCAAGGTGGTAG  
AAGCAGTTTACGAGAGAGAGGCGAGCGTGTGAGTCTACCTGCTACCCCGTACTATGTATATCCCGACTATGAGA  
CAGCCGCCGAGGTGTGCGGAGACGAAATAAAATACTAGTTATCTTTCCGGCTCCCTGAGTTCAGGCCGGACAA  
GCCAGGCCAAGCTGCAGCAAGCCCCAAGCAAGAGAACGACGGCGCTTAGAGTCAATGGCAGGCCAGGCTGA  
CGAACTTCCCTTGCTCGACCTTTTTTTTTCTGTGAAAGATGCGAAGTTCGCTCTTTATTAGCGAAGTGGGATC  
ATCTCGTAGATGGCCTAGGTAAACAACCTGCATATGTACCTTCACCGAGCTTCTTATCTTTCAGAATAACCAA  
TGTTAGCATTATGGGGTCCCAATGGTTGGGGTGTATTTGCCGCCCACCTTTGACATATTTCCGCCGTACATC  
AGCGTTTAACTGCTCCGCCAGCTCTGGTTCGGGCATGGAGGGCTTAGGAACTGCAGGATCACCCTAGGCGCC  
GTCCGAGGCTCTTGAGAAGCAATATTTCTCATCGCTAACGACTTTGGAGCACCGGTAGTAGTGATGGGAGGGA  
ATTGAGAGGGAAGCGGCGACACTGCCATAATGTCAAGCGAAATTGGCTTCCACCAATTTGCGGAGACAAAGGA  
TAGAGTGGCACAAGAGTGAGACACTGCTCTGAGCAGCTCTCCTAGTATTCATCAACAATACAGCTTTGTTTG  
TTATCAAAATATATATCGTCTGCTTTTCATCTTTGAATGTTGCGATGGAAGCTTCGGCTGGCCCGAGCTCACCG  
GAGATCGGCGTTTTGTTGATCCGAGCTAAGGCCGTGCGACCTAATTCAAAATTTTGGTGCAAAATCTTGAACG  
AAGTCGAAGAACCAGTTGAACATCTTCTATACAGCGCCATTGAGCATTGGATTGACTCGCCTTGAGTCCCTTA  
CCGTTTTACCTGGGCCCTTGGTGCCGTGGCTTTTTTTCGCTTTCGTACGCCCCGCGATGGTGTCTTACACCA  
CGAGCTAAATTTAAATCTTACCCCCAGATCTCGACATTGAACGGTTTGATATAAGGCGATATAACCACT**AT**  
**GGCTGCGGCGCGCATACCGGGCTTTAATGCCAGAACATCCCTTCCACTACGGCTCTTCACTTCCGTCACAACC**  
**CCCATTATCAGCCATGCGTACGGTACCTTCATCAATCTCGAAAACCCGCAACAGTGCCATCACCTACCCCAT**  
**CGTGCCCGATGTCGAAACATTCCTACGCCTAATTGGGCGAAACATGTCCAGATATTCAGCAAAATCACCGGA**  
**TGGAAGCAATTGTTTACAGCGGACTCGGCTGAGCTTCGAGAATTGGGCATAGAAATGACAAGGGACAGACGAT**  
**ACATACTGCGGTGGAGAGAGAAATTCAGACAGCAGGACTACGGCCCAGGAGGTGATTTGCAAAACGTTGTTGA**  
**CGGTGTTGCTGAGCTGAGAGCTGTTGAGGTCCCCGTGAAAAGTCAAAGAGTGCAAAAACCTACCAATGCCACC**

GACGGAGAGTCCCTAGATGTTAGCACAAATGGGCACCGCTACCCTTACACCTGGAATGCGTTATGCGATTGTCA  
ATCTACCACCAGGCGAAACAGAGCTCAAGGATACTTCCAAGCCACTCAAAAAGTTTGCCATTATAAAATTGCA  
CCACGGGAATATGATCAAGGGGCCGTATGCTCAGATTATTCCAAACACATGGAGTACCGCCGTCAAGGTTTCA  
GTTACTGATGGCATGTGGGAGCATAAGCGTGGCAGAAAAGATTGACGGTGGTCAGAGAAAGACAGAAGGAGATCA  
GAGCGAAGAGAGCGTTGGCGGAGAGGAGGAATGCTCAGGCAGCTGCTTAGCGGTTTTGTAGCGTCGGAGTTGA  
AAGGGGCACGGGATTAACGACGTTGCTGGCTGGTTACTTCCTGACATTACTGGCTTGGATATCGCTGTTTGA  
TGCTAGATTATCCCAGCTACGGGAAGATGTACTATTTCCAATGTATATTACCATTTTTGTTTCTGCACCAAAGC  
TAACGGAGTAACTGCAACTTTCTGTTTTCATCTAGAGTATTGTAATAAAATGGCTGTATTAGAATAATACTATTA  
TCTACATCCCCCATCTTCAAAGCATGGTCAAAGAAAAGTTTTTATTACATATGCTCTATTCCGAAAACCTAT  
TTGCGTGACCATAAAGTGCAAATATGGCTCGGTGTATAAACGTAAGAAAAGAGAAGAAAATAAATTAGCAAGAA  
GCAAGAAATTTAACATGATTCAATCCGCAGTCGTGATTAACAATTTCTGGGAAGGCTGCTTTTCGCTTCTCCCAC  
GAGACCATTGGGTCGCCAAGGGGCTTCGAGAAGAGGGACTATTAATGCAAAGTTAGTAAAATCGAGCAAATA  
AAAAGGAGCGTAATATGCCAAACTTACCGAATAGTCAGTTGGCGGCACAACATCTTTGGTGCCTTCAACTTGC  
TTCCATTTTATTAGTCTGGCTAACGTAGCTGTTACGGTTCCAAGCTGAACATATGCAAATTGTTTACCGATGC  
ATCTGTGTCTGCCTGAGCCGAATGGGAGGTAAGGGCTGTTGGCACCCCTTGCTAACCAAACCGTATCCGTAATC  
TGTCTTTTCTTCACTGGCCTCGACTACGGTGACACCGACGTTGTTCTCCCATCGGTGAGGGTTCCAAACAAGA  
GGGTCAGGGAAAGTACTGAGGGTCTCGTGAGGGAACACCAGGAGCGGCAAGGAGGTTGTGAGAGGTTGGGACAA  
CATAGTTAGTTCCTTCAACGGGCATAGGGATTTAACAGCACGGAGGATAGAGTGGATGGGAGCGTGGAGGCGG  
AGAGTCTCCTTGATTACATTGTTGTGAAGATCAAGTTTCTGGAGAGATTTCGTAGGTGAGTGGTGAAGATCCT  
CGCCGAGAACACGTTTCTGTTTCTCGTAGAGTTCTCGAGAATATCTGGACGGCTGGCAAGGCGGAGAACGAT  
CCAGGAGCCGGTGGAGGAAGAAGAGTGCTGGCCAGCCATAAGAAGAGCAATCATCATGTGGGCGACTTCGATA  
TCTGGAATTGGCGTTCATTCTTGTACACGGACGACATCAAGTTCCATACCATGTCTCTCGGAGTCTTTCTCTC  
CACCAGCCTCACGTGCTGACGGATGATGTCGGTGTAAACCTGGGCCATCTTCTTTTGGAGCACGGTCACGCTT  
GCGGTTGTGTGGGAAGGGGAACCATGGGAACATGAAGTTGATGGCGGCGAAGCCCATGTGAGATCGGAGTAG  
AGTTCGCGAAAGCTGGAATCGAACTTTCTCGCACCTCCTTGCCCTGTAGAGATCGAGAGGCGGTGTAGATGG  
TGATTTTACCCATGACCTTGTGACGTTGAAAACCTCCGGAGTCGCCCTTGAAGACGGGGGAGGACTCGAAGAA  
CTGCTCAACTTCTTGGTGATCAGGGTGACATAGGATCGGAGAGCTTCAGAGGTGAGGCCGAACCTTGACGAAC  
TGGTAGACGATTAAATTAGCAATGGAGGCCAGGAGATGTAGACGGGAATAAATTGCTGTACACACCTTCTTC  
TGCTCCATGAGCTTGGAGTTTGGGCAATCATAACCACATGTCGTCCGAACACTGGGGTGGTGGGGGGGAGT  
AGACATCCTCCGCGCAAACATCCTTGAGCTTGCCGTTCAAATGAAATCATTTCCTTTGTACCGAGAAAAAC  
AGTCGTCTTCTTGCCAGCAGTATGAATGTGAAGATGTCTCATACTAGAGTACCGAAATTATTTATACGTTA  
GCTTTGCGCAACCTGGTATATAGCTAAGTTGAATTGCACCAACTAACCTTCTCCTTGCAGTCGTCAAAGAACT  
TGACGGGTCAAATCCATAGGAGATCGTGCTTCCAATGACCGGAACCCAGTGAAGACCACCGGAGGCTTTGT  
AGGGTCTTGAACAGGAGCTGCTGCAGGACGTTGATAACAATGGAGAGGACGATAAAAAGCCGATACGGCACTT  
GCGACGAGCGCGGCGGTGGACAGGGTCGAGCAGTTCTCGCAGAAACGAGAGACAATGTCGGCTAAGAGGCCCA  
TGGTGATCGTCTTATCCTCCTGCTTCCGCTCAAGACTTGTTCGTTGTTTGTGATGAATGCCTTGAAGCTGCTG  
CGGACGAAGCAAGGGAAAAAAAAGTTGCATCTTGAGATCGAACTCGCATTTTTATGCAAGGGGCGTACGGTAC  
TGTAAGATAATGCATTGTTTCTGGTATTTTTACGTCGTTTTTTTTATTGGTTTACAGCTGCATCTCCAATACCA

AATTACCGCTGCCCTTCTGCCCCCTTTTTCTCCCTTGCGGCGAGCAGGCCAACGGCCGTCGAGATGATTACA  
ATTCGAGCTCGCGACGGGGCGGAGACGGTCCCTGGACGGTGTTTCGTGCAGGGCGTCATCTCCTCCGCTGGATT  
CTCTGCTGCCTGAGCGAGCGAGACCTGACGGTGGGCGCATCATCAGGCCATCGCGGCTTCAGGGAGGCCGGCT  
TAGTCATGGCAGGTTAAGCTATCAACGGTCCGTCAATATTAATATTGTTATTATTGTCCGGTGGTGAGTGAGA  
AGAGACTGTAATTACATTGCCAGTGGACGCTATTGTACCCATAGTTATATCACTCAAAAATGAAATCCTAAA  
CACGAGAATCGCCGTCGTCTCCAAGGCAGCGACCAAGCCGGTTTTTCTGCTGCTTTTTCGGTTAGTTGGCCCC  
TATCACCTTTCAACCGGGGGGTATAGTTAAAGAAAAAATTAAGAAAGATCACAATCAATATAAACGAAAAAGG  
AATTGGAACAAAAGTCCGGAATAGCACGGTATAGCTAGCAGAATACCATCCCAAGACGGATCGGGCTTCTGC  
**TACCTCTTTCTTTCTCGTGGAGTCTTGTCTGCGTCTTGGTGGACAACCTGGCTTCCGTGCCTCACTCTCAA**  
**GCTCCAGCGAGTCGTGACTGCTCATCGAATAACACCTGGTCTCCACTTCCACCGAGTTCATGAACTCCTT**  
**TGAGTTCGGTTGCCAGCCGGTTTGGGCTCCTGGGCTCGAGGCACAGGATGATTCTGGTATATAGTTATGTCC**  
**TGGAAGCAGGGTCGTCTTCTTGGTCTTCCACCACCTGCTTGACCGTGACTTCATGTATGTCACTCAACAGCC**  
**TGCGGACCATAGTTGGCCGGCGTTCTTTGGACACCCTCAGGCCACCGATGGCCCCGGCTAGGTCATCGGTGCT**  
**GTCTGCCACCCTAGGCTCATCGGGGTCGATGCCAGTGATCCATGGGTGCTGGAGACACTCATCTACTTTCAA**  
**CGCTCCTTACGTCGACTTCGATCATGGAGTCGATAAAGTCCATGGCTCTATAATCGATTGAGTCCAGTATG**  
**GAAGAGGATACTTAAATATTCCGAGCTGGATCTGCTCTTTCTGAGTGTATGGGTAGTCTCTTGGGTGGTACAG**  
**TTCATCTGAGAAAGGAGGGAATCCGCACAGGCAGATGTAGAGTACCACTCCGAGTGACCAGATGTCAACCGCT**  
**CGGTGTACATTCTGGCTTCAGCGTTTTCTGCCAGTATCTCAGGAGCAACATCTGATAAGAATTGTTAGATTC**  
**ACATTTGGTGGATGAAAGCACCAGCGTTAACAGAGCAGCAGGGAAACTTACAGCCAGGCGTTCACATCTAGA**  
**TTTTATGATCTCTTAGTAAGATTGACCCAGATTTGAACGGCAGAAGGTAGGTGAACTTACAGCGTGGTGGTA**  
**AAGGAGTGTTCGCCGACAATCTTTGCAAGGCCGAAGTCTGCTAATTTTACGGTAAGATCTTTGTGACAACCA**  
**GAAATGTTCTCTGGCTTTATGTCACGGTGAATGATGTTTCGTTTCATGCTACGACAACGGTTAGCCATATACACT**  
**GCCATGAGTCTGATCAACCAGAAAACGAACGACATAACCAGGTATCTCAAACCTTCAAAAAGCTGAATGAATAC**  
**TTTTCGAGTCTCCTCCTCGCTGAGTTTTCTGATGCCTAATGATCCAGTTGAACAGTTCGCCCTCTGGCGCAAGC**  
**TCAAGAATCAGGAAGACACCATCGCTCTCGTCAAAGGTATCCTTTAGGCACAGCATGTTCCGATGGTTGACAC**  
**TCATCAGCATTGAAATCTCTTGCTGTAGTGCTTCACGGTCTAGCCTCTGAACTGCGCCCGGGCGTTTCTCGAA**  
**ATGTTTGACGGCATACTTGATCCCCGTAGAACGTTACAGGCATAGATAAACCGAGGCAAAGTGTCCCTACCC**  
**AGCATATCAAAGAGCTTATACTGCTGTGCGGAACTTGCTTGTGTTCCGACTCCGCGGGTAGTTGAAGATGAATC**  
**TGGATTCTTGCAAGGATGGTAATCTCGTCCGTTTTTCGAGTCTCGGCGTTTGTCTTGCCGATGATGGCGTC**  
**GTTGATGAAAGTGCCATTGATAGAGAGATCTTCCACAATTGCAACAAAGTCTCCTCCCCTGTTTTCTGGAAT**  
**ATCAGGCAATGGCGGTTGGATATCGTGGGGAGCTTGATCCTGAAATCTGCAGTACCCAGATGGTTAGCAATTG**  
**ATCACTAGACGGCAGAGAGTATGCAATGGGTAAAGGCATACCGCACTCTGCATGCCGGCCTATAAGATATCCA**  
**GCGCGGTTTTATCTCTCTAGTTCCACGTTTTGAGGCGTTGCTTTCCGGCGTTGATATGTCTGATGCTGCTCAA**  
**TTACCGGTGTAGTATTTGTGCTGTCCCGCTTCTCAGAACCAATTGGCCTCCAAAATTGTTATCTAGCGGAGT**  
**AAGATATCCCCATATGCCCTGGGCCACCTCGTCTTCCACATCGTCAATGGATTGGATTGGGGGATACTGAGAG**  
**AAACCCTGGGTGGGACATGACGACTCGTCTGGCGATTGACCTCGAGGCGCCTGGTTTTCGGCGGCCTTCTGGGG**  
**GAGAACTGTAGCAACTTACGCTTTTTCTTCTGAGATTACTTCATTAGCTAGGGGAGAAGGTAGATATCCGGC**  
**ATCCTGCTGCAATTGAGATGAGATTTCGAGGAGATCTCCGTGGCTTCTTTGATTTCATGGTCTGGAGCTGCCTTG**

CCCTGCAGGTTTGGGAAAAGAAGTTAGCAGCTTGAATATTTTCATCCTTCTGAGAACTAATTGGATATAACG  
TGTTTCATATCTTACCCTTTCTCTCTTCAGATTGCTTCTCTCCCTCTGCGGAGGCATGTTTTGGCCCCGGCGTGA  
AGAAGTTGACGGCAGTTACGAATATCCCGGATGGACTGCCAATGGCTTCGCAACTTCAACTCCAAGTCGATGG  
CAGGCAAGATCAAGCCCCAACACACTCTACCGTAGTTGCAAGACCGAACAGTGTGCGTGTGCAAGGTGGTAGA  
AGCAGTTCAGCAGAGAGAGGCAGCGTGTGAGTCTACCTGCTACCCCCGTACTATGTATATCCCGACTATGAGA  
CAGCCGCCGAGGTGTGCGGAGACGAAATAAATAACTAGTTATCTTTTCGGCTCCCTGAGTTCAGGCCGGACAA  
GCCAGGCCAAGCTGCAGCAAGCCCCAAGCAAGAGAACGACGGCGCTTAGAGTCAATGGCAGGCCAGGCTGA  
GCGAACTTCCCTTGCTCGACCTTTTTTTTTCTGTGCGAAAGATGCGAAGTCGCTCTTTATTAGCGAAGTGGGATC  
ATCTCGTAGATGGCCTAGGTAAACAACCTGCATATGTACCTTCACCGAGCTTCTTATCTTTCAGAATAACCAA  
TGTTAGCATTATGGGGTCCCAATGGTTGGGGTGTATTTGCCCGCCACCTTTGACATATTTCCGCCGTACATC  
AGCGTTTAACTGCTCCGCCAGCTCTGGTTCGGGCATGGAGGGCTTAGGAACTGCAGGATCACCCTAGGCGCC  
GTCCGAGGCTCTTGAGAAGCAATATTTCTCATCGCTAACGACTTTGGAGCACCGGTAGTAGTGATGGGAGGGA  
ATTGAGAGGGAAGCGGCGACACTGCCATAATGTCAAGCGAAATTGGCTTCACCAATTTGCGGAGACAAAGGA  
TAGAGTGGCACAAGAGTGAGACACTGCTCTGAGCAGCTCTCCTAGTATTCATCAACAATACAGCTTTGTTTG  
TTATCAAAATATATATCGTCTCTTTTCATCTTTGAATGTTGCGATGGAAGCTTCGGCTGGCCCGAGCTCACCG  
GAGATCGGCGTTTTGTTGATCCGAGCTAAGGCCGTGCGACCTAATTCAAAATTTTGGTGCAAAATCTTGAACG  
AAGTCGAAGAACCAGTTGAACATCTTCTATACAGCGCCATTGAGCATTGGATTGACTCGCCTTGAGTCCCTTA  
CCGTTTTACCTGGGCCCTTGGTGCCGTGGCTTTTTTCGCTTTCGTACGCCCCGCGATGGTGTCTTACACCA  
CGAGCTAAATTTAAATCTTCAACCCCCAGATCTCGACATTGAACGGTTTGATATAAGGCGATATAACCACTAT  
GGCTGCGGCGCGCATACCGGGCTTTAATGCCAGAACATCCCTTCCACTACGGCTCTTCACTTCCGTCACAAC  
CCCCATTATCAGCCATGCGTACGGTACCTTCATCAATCTCGAAAACCCGCAACAGTGCCATCACCTACCCCAT  
TCGTGCCCGATGTCGAAACATTCCTACGCCTAATTGGGCGAAACATGTCCAGATATTCCAGCAAAATCACCGG  
ATGGAAGCAATTGTTTACAGCGGACTCGGCTGAGCTTCGAGAATTGGGCATAGAAATGACAAGGGACAGACGA  
TACATACTGCGGTGGAGAGAGAAATTCAGACAGCAGGACTACGGCCCAGGAGGTGATTTGAAAACGTTGTTG  
ACGGTGTGCTGAGCTGAGAGCTGTTGAGGTCCCGTCGAAAAGTCAAAGAGTGCAAAAACCTACCAATGCCAC  
CGACGGAGAGTCCCTAGATGTTAGCACAATGGGCACCGCTACCCTTACACCTGGAATGCGTTATGCGATTGTC  
AATCTACCACCAGGCGAAACAGAGCTCAAGGATACTTCCAAGCCACTCAAAAAGTTTGCCATTATAAATTGC  
ACCACGGGAATATGATCAAGGGGCGGTATGCTCAGATTATTCCAACACATGGAGTACCGCCGTCAAGGTTCA  
GGTACTGATGGCATGTGGGAGCATAAGCGTGGCAGAAAAGATTGACGGTGGTCAGAGAAGACAGAAGGAGATC  
AGAGCGAAGAGAGCGTTGGCGGAGAGGAGGAATGCTCAGGCAGCTGCTTAGCGGTTTTGTAGCGTCGGAGTTG  
AAAGGGGGCACGGGATTAACGACGTTGCTGGCTGGTTACTTCTGACATTACTGGCTTGGATATCGCTGTTTA  
GATGCTAGATTATCCAGCTACGGGAAGATGTAATTTCCAATGTATATTACCATTTTGTCTGCACCAA  
GCTAACGGAGTAACTGCAACTTTCCTGTTTCATCTAGAGTATTGTAATAAATGGCTGTATTAGAATAACTAT  
TATCTACATCCCCATCTTCAAAGCATGGTCAAAGAAAAGTTTTTATTACATATGCTCTATTCCGAAAACCT  
ATTTGCGTGACCATAAAGTGCAAATATGGCTCGGTGTATAAACGTAAGAAAAGAGAAGAAATAAATTAGCAAG  
AAGCAAGAAATTTAACATGATTCAATCCGCAGTCGTGATTAACAATTTCTGGGAAGGCTGCTTTTCGCTTCTCCC  
ACGAGACCATTGGGTGCGCAAGGGGCTTCGAGAAGAGGGACTATTAATGCAAAGTTAGTAAAATCGAGCAAAA  
TAAAAAGGAGCGTAATATGCCAACTTACCGAATAGTCAGTTGGCGGCACAACATCTTTGGTGCCTTCAACTT

GCTTCCATTTTCATTAGTCTGGCTAACGTAGCTGTTACGGTCCAAGCTGAACATATGCAAATTGTTACCGAT  
GCATCTGTGTCTGCCTGAGCCGAATGGGAGGTAAGGGCTGTTGGCACCCCTTGCTAACCAAACCGTATCCGTAA  
TCTGTCTTTTCTTCACTGGCCTCGACTACGGTGACACCGACGTTGTTCTCCCATCGGTGAGGGTTCCAAACAA  
GAGGGTCAGGGAAGTACTGAGGGTCTCGTGAGGGAACACCAGGAGCGGCAAGGAGGTTGTGAGAGGTTGGGAC  
AACATAGTTAGTTCCTTCAACGGGCATAGGGGATTTAACAGCACGGAGGATAGAGTGGATGGGAGCGTGGAGG  
CGGAGAGTCTCCTTGATTACATTGTTGTGAAGATCAAGTTTCTGGAGAGATTCTGATAGGTGAGTGGTGAAGAT  
CCTCGCCGAGAACACGTTTCTGTTCTCGTAGAGTTCCTCGAGAATATCTGGACGGCTGGCAAGGCGGAGAAC  
GATCCAGGAGCCGGTGGAGGAAGAAGAGTGCTGGCCAGCCATAAGAAGAGCAATCATCATGTGGGCGACTTCG  
ATATCTGGAATTGGCGTTCCATTCTTGTACACGGACGACATCAAGTTCATACCATGTCCTCGGAGTCTTTCT  
CTCCACCAGCCTCACGTCGCTGACGGATGATGTCGGTGTAAACCTGGGCCATCTTCTTTTGGAGCACGGTCACG  
CTTGCGGTTGTGTGGGAAGGGGAACCATGGGAACATGAAGTTGATGGCGGCAAGCCCATGTCGAGATCGGAG  
TAGAGTTCCGCAAAGCTGGAATCGAACTTTCTCGCACCTCCTTGCCCTGTAGAGATCGAGAGGCGGTGTAGA  
TGGTGATTTTACGCCATGACCTTGCTGACGTTGAAAACCTCCGGAGTCGCCCTTGAAGACGGGGGAGGACTCGAA  
GAACTGCTCAACTTCCTTGGTGATCAGGGTGACATAGGATCGGAGAGCTTCAGAGGTGAGGCCGAACTTGACG  
AACTGGTAGACGATTAAATTAGCAATGGAGGCCAGGAGATGTAGACGGGAATAAAATTGCTGTACACACCTTC  
TTCTGCTCCATGAGCTTGGAGTTTGGGCAATCATAACCACATGTCGTCCGAACACTGGGGTGGTGAGGGGGG  
AGTAGACATCCTCCGCGCAAACATCCTTGAGCTTGCCGTTCAAATGAAATCATTTCCCTTTGTACCGAGAAA  
AACAGTCGTCTTCTTGCCAGCAGTATGAATGTGAAGATGTCTCCATACTAGAGTACCGAAATTATTTATACG  
TTAGCTTTGCGCAACCTGGTATATAGCTAAGTTGAATTGCACCAACTAACCTTCTCCTTGAGTGTCAAAGA  
ACTTGTACGGGTCAATTCCATAGGAGATCGTGCTTCCAATGACCGGAACCCAGTGGAAAGACCACCGGAGGCTT  
TGTAGGGTCTTGAACAGGAGCTGCTGCAGGACGTTGATAACAATGGAGAGGACGATAAAAGCCGATACGGCA  
CTTGCGACGAGCGCGCGGTGGACAGGGTCGAGCAGTTCTCGCAGAAACGAGAGACAATGTCGGCTAAGAGGC  
CCATGGTGATCGTCTTATCCTCCTGCTTCCGCTCAAGACTTGTTGTTGTTGTGATGAATGCCTTGAAGCTG  
CTGCGGACGAAGCAAGGGAAAAAAAAGTTGCATCTTGAGATCGAACTCGCATTTTATGCAAGGGGCGTACGG  
TACTGTAAGATAATGCATTGTTCTGGTATTTTACGTCGTTTTTTTATTGTTTACAGCTGCATCTCCAATACC  
AAAAATTACCGCTGCCCTTCTGCCCCCTTTTTCTCCCTTGCGGCGAGCAGGCCAACGGCCGTCGAGATGATTA  
CAATTGAGCTCGCGACGGGGCGGAGACGGTCCCTGGACGGTGTTCGTGCAGGGCGTCATCTCCTCCGCTGGA  
TTCTCTGCTGCCTGAGCGAGCGAGACCTGACGGTGGGCGCATCATCAGGCCATCGCGGCTCAGGGAGGCCGG  
CTTAGTCATGGCAGGTTAAGCTATCAACGGTCCGTCAATATTAATATTGTTATTATTGTCCGGTGGTGAGTGA  
GAAGAGACTGTAATTACATTGCCAGTGGACGCTATTGTACCCATAGTTATATCACTCAAAAATGAAATCCTA  
AACACGAGAATCGCCGTCGTCTCAAGGCAGCGACCAAGCCGTTTTTTCTGCTGCTTTTTCGGTTAGTTGGCCC  
CCTATCACCTTTCAACCGGGGGGTATAGTTAAAGAAAAAATTAAGAAAGATCACAATCAATATAAACGAAAA  
GGAATTGGAACAAAAGTCCGGAATAGCACGGTATAGCTAGCAGAATACCATCCCAAGACGGATCGGGCTTCT  
GCTAACCTCTTTCTTTCTCGTGGAGTCTTGTCTGCGTCGTCTTGGTGGACAACCTGGCTTCCGTGCCTCACTCTC  
AAGCTCCAGCGAGTCGTGACTGCTCATCGAATAACACCTGGTCTCCACTTCCACCGAGTTCATGAACTCC  
TTTGAGTTCCGGTTGCCAGCCGTTTTGGGCTCCTGGGCTCGAGGCACAGGATGATTCTGGTATATAGTTATGT  
CCTGGGAAGCAGGGTCGTCTTCTTGGTCTTACCACCTGCTTGACCGTGACTTCATGTATGTCACTCAACAG  
CCTGCGGACCATAGTTGGCCGGCGTTCTTTGGACACCCTCAGGCCACCGATGGCCCCGGCTAGGTGATCGGTG

CTGTCTGCCACCCTAGGCTCATCGGGGTCGATGCCAGTGATCCATGGGTGCTGGAGACACTCATCTACTTTCA  
AACGCTCCTTCACGTCGACTTCGATCATGGAGTCGATAAAGTCCATGGCTCTATAATCGATTGAGTCCCAGTA  
TGGAAGAGGATACTTAAATATTCCGAGCTGGATCTGCTCTTTCTGAGTGTATGGGTAGTCTCTTGGGTGGTAC  
AGTTCATCTGAGAAAGGAGGGAATCCGCACAGGCAGATGTAGAGTACCACTCCGAGTGACCAGATGTCAACCG  
CTCGGGTGTACATTCTGGCTTCAGCGTTTTCTGCCAGTATCTCAGGAGCAACATCTGATAAGAATTGTTAGAT  
TCACATTTGGTGGATGAAAGCACCAGCGTTAACAGAGCAGCAGGGAAACTTACAGCCAGGCGTTCCACATCTA  
GATTTTATGATCTCTTAGTAAGATTGACCCAGATTTGAACGGCAGAAGGTAGGTGAACTTACAGCGTGGTGG  
TAAAGGAGTGTTCGCCGACAATCTTTGCAAGGCCGAAGTCTGCTAATTTTACGGTAAGATCTTTGTGCAAC  
CAGAATGTTCTCTGGCTTTATGTCACGGTGAATGATGTTTCGTTTCATGCTACGACAACGGTTAGCCATATA  
CTGCCATGAGTCTGATCAACCAGAAAACGAACGACATAACCAGGTATCTCAAACCTTCAAAAAGCTGAATGAAT  
ACTTTTCGAGTCTCCTCCTCGCTGAGTTTCTGATGCCTAATGATCCAGTTGAACAGTTCGCCCTCTGGCGCAA  
GCTCAAGAATCAGGAAGACACCATCGCTCTCGTCAAAGGTATCCTTTAGGCACAGCATGTTCCGATGGTTGAC  
ACTCATCAGCATTGAAATCTCTTGCTGTAGTGCTTCACGGTCTAGCCTCTGAACTGCGCCCGGGCGTTTCTCG  
AAATGTTTGACGGCATACTTGATCCCCGTAGAACGTTACAGCGCATAGATAAACCGAGGCAAAGTGTCCCCTAC  
CCAGCATATCAAAGAGCTTATACTGCTGTGCGGAACCTTGCTTGTGTTCCGACTCCGCGGGTAGTTGAAGATGAA  
TCTGGATTCTTGCAGGATGGTAATCTCGTCGCCGTTTTCTGAGCTCTCGGCGTTTGTCTTGCCGATGATGGCG  
TCGTTGATGAAAAGTGCCATTGATAGAGAGATCTTCCACAATTGCAACAAAGTCTCCTCCCCTGTTTTCTGTGGA  
ATATCAGGCAATGGCGGTTGGATATCGTGGGGAGCTTGATCCTGAAATCTGCAGTACCCAGATGGTTAGCAAT  
TGATCACTAGACGGCAGAGAGATGCAATGGGTAAAGGCATACCGCACTCTGCATGCCGGCCTATAAGATATC  
CAGCGCGGTTTATCTCTCTAGTTCCACGTTTTGAGGCGTTGCTTTCCGGCGTTGATATGTCTGATGCTGCTCC  
AATTACCGGTGTAGTATTTGTGCTGTCCCGCTTCTTCCAGAACCAATTGGCCTCCAAAATTGTTATCTAGCGGA  
GTAAGATATCCCCATATGCCCTGGGCCACCTCGTCTTCCACATCGTCAATGGATTGGATTGGGGGATACTGAG  
AGAAACCCTGGGTGGGACATGACGACTCGTCTGGCGATTGACCTCGAGGCGCCTGGTTTCGGCGGCCTTCTGG  
GGGAGAACTGTAGCAACTTCACGCTTTTTCTTCTGAGATTACTTCATTAGCTAGGGGAGAAGGTAGATATCCG  
GCATCCTGCTGCAATTGAGATGAGATTGAGGAGATCTCCGTGGCTTCTTTGATTGATGGTCTGGAGCTGCGT  
TGCCCTGCAGGTTTGGGAAAAGAAGTTAGCAGCTTGAATATTTTCATCCTTCTGAGAACTAATTGGATATAA  
CGTGTTTCATATCTTACCCTTTCTCTCTTCAGATTGCTTCTCTCCCTCTGCGGAGGCATGTTTTGGCCCGGCGT  
GAAGAAGTTGACGGCAGTTACGAATATCCCGGATGGACTGCCAATGGCTTCGCAACTTCAACTCCAAGTCGAT  
GGCAGGCAAGATCAAGCCCCAACACACTCTACCGTAGTTGCAAGACCGAACAGTGTGCTGTGCAAGGTGGTA  
GAAGCAGTTCAGCAGAGAGAGGAGCAGCGTGTGAGTCTACCTGCTACCCCGTACTATGTATATCCCGACTATGAG  
ACAGCCGCCGAGGTGTGCGGAGACGAAATAAATAACTAGTTATCTTTCCGGCTCCCTGAGTTCCAGGCCGGACA  
AGCCCAGGCCAAGCTGCAGCAAGCCCCAAGCAAGAGAACGACGGCGCTTAGAGTCAATGGCAGGCCAGGCTG  
AGCGAACTTCCCTTGCTCGACCTTTTTTTTTCTGTGCAAGATGCGAAGTCGCTCTTTATTAGCGAAGTGGGAT  
CATCTCGTAGATGGCCTAGGTAAACAACCTGCATATGTACCTTCACCGAGCTTCTTATCTTTCAGAATAACCAA  
ATGTTAGCATTATGGGGTCCCAATGGTTGGGGTGTATTTGCCCGCCACCTTTGACATATTTCCGCCGTACAT  
CAGCGTTTAACTGCTCCGCCAGCTCTGGTTCGGGCATGGAGGGCTTAGGAACTGCAGGATCACCCTAGGCGC  
CGTCCGAGGCTCTTGAGAAGCAATATTTCTCATCGCTAACGACTTTGGAGCACCAGGTAGTAGTGATGGGAGGG  
AATTGAGAGGGAAGCGGCGACACTGCCATAATGTCAAGCGAAATTGGCTTCCACCAATTTGCGGAGACAAAGG

ATAGAGTGGCACAGAGTGAGACACTGCTCTGAGCAGCTCTCCTAGTATTCAATCAACAATACAGCTTTGTTT  
GTTATCAAAATATATATATCGTCGTCTTTCATCTTTGAATGTTGCGATGGAAGCTTCGGCTGGCCCCGAGCTCACC  
GGAGATCGGCGTTTTGTTGATCCGAGCTAAGGCCGTGGACCTAATTCAAATTTTGGTGCAAAATCTTGAACG  
AAGTCGAAGAACCAGTTGAACATCTTCTATACAGCGCCATTGAGCATTGGATTGACTCGCCTTGAGTCCCTTA  
CCGTTTTACCTGGGCCCTTGGTGCCGTGGCTTTTTTTCGCTTTCGTACACGCCCGCCGATGGTGTCTTACACCA  
CGAGCTAAATTTAAATCTTACCCCCCAGATCTCGACATTGAACGGTTTGATATAAGGCGATATAACCACT**AT**  
**GGCTGCGGCGCGCATACCGGGCTTTAATGCCAGAACATCCCTTCCACTACGGCTCTTCACTTCCGTCACAAAC**  
**CCCCATTATCAGCCATGCGTACGGTACCTTCATCAATCTCGAAAACCCGCAACAGTGCCATCACCTACCCCAT**  
**TCGTGCCCGATGTCGAAACATTCCCTACGCCTAATTGGGCGAAACATGTCCAGATATTCCAGCAAAATCACCGG**  
**ATGGAAGCAATTGTTTACAGCGGACTCGGCTGAGCTTCGAGAATTGGGCATAGAAATGACAAGGGACAGACGA**  
**TACATACTGCGGTGGAGAGAGAAATTCAGACAGCAGGACTACGGCCAGGAGGTGATTTGAAAACGTTGTTG**  
**ACGGTGTGCTGAGCTGAGAGCTGTTGAGGTCCCCGTGAAAAGTCAAAGAGTGCAAAAACCTACCAATGCCAC**  
**CGACGGAGAGTCCCTAGATGTTAGCACAATGGGCACCGCTACCTTACACCTGGAATGCGTTATGCGATTGTC**  
**AATCTACCACCAGGCGAAACAGAGCTCAAGGATACTTCCAAGCCACTCAAAAAGTTTGCCATTATAAATTGC**  
**ACCACGGGAATATGATCAAGGGGCCGTATGCTCAGATTATTCCAACACATGGAGTACCGCCGTCAAGGTTCA**  
**GGTACTGATGGCATGTGGGAGCATAAGCGTGGCAGAAAAGATTGACGGTGGTCAGAGAAGACAGAAGGAGATC**  
**AGAGCGAAGAGAGCGTTGGCGGAGAGGGAATGCTCAGGCAGCTGCT**TAG**GCGTTTTGTAGCGTCGGAGTTG**  
**AAAGGGGGCACGGGATTAACGACGTTGCTGGCTGGTTACTTCCTGACATTACTGGCTTGGATATCGCTGTTTA**  
**GATGCTAGATTATCCAGCTACGGGAAGATGTAATAATTTCCAATGTATATTACCATTTTGTCTTGCACCAA**  
**GCTAACGGAGTAACTGCAACTTTCCTGTTTATCTAGAGTATTGTAATAAATGGCTGTATTAGAATAATACTAT**  
**TATCTACATCCCCATCTTCAAAGCATGGTCAAAGAAAAGTTTTTATTACATATGCTCTATTCCGAAAACCT**  
**ATTTGCGTGACCATAAAGTGCAAATATGGCTCGGTGTATAAACGTAAGAAAAGAGAAGAAATAAATTAGCAAG**  
**AAGCAAGAAATTTAACATGATTCATCCGCAGTCGTGATTA**TCA**ATTTCTGGGAAGGCTGCTTTTCGCTTCTCCC**  
**ACGAGACCATTGGGTGCGCAAGGGGCTTCGAGAAGAGGGACTATTAATGCAAAGTTAGTAAAATCGAGCAAAA**  
**TAAAAGGAGCGTAATATGCCAAACTTACCGAATAGTCAGTTGGCGGCACAACATCTTTGGTGCCTTCAACTT**  
**GCTTCCATTTTATTAGTCTGGCTAACGTAGCTGTTACGGTTCCAAGCTGAACATATGCAAATTGTTACCGAT**  
**GCATCTGTGTCTGCCTGAGCCGAATGGGAGGTAAGGGCTGTTGGCACCCCTTGCTAACCAACCGTATCCGTAA**  
**TCTGTCTTTTCTTCACTGGCCTCGACTACGGTGACACCGACGTTGTTCTCCCATCGGTGAGGGTTCCAAACAA**  
**GAGGGTCAGGGAAGTACTGAGGGTCTCGTGAGGGAACACCAGGAGCGGCAAGGAGGTTGTGAGAGGTTGGGAC**  
**AACATAGTTAGTTCCTTCAACGGGCATAGGGGATTTAACAGCACGGAGGATAGAGTGGATGGGAGCGTGGAGG**  
**CGGAGAGTCTCCTTGATTACATTGTTGTGAAGATCAAGTTTCTGGAGAGATTTCGTAGGTGAGTGGTGAAGAT**  
**CCTCGCCGAGAACACGTTTCTGTTCTCGTAGAGTTCTCGAGAATATCTGGACGGCTGGCAAGGCGGAGAAC**  
**GATCCAGGAGCCGGTGGAGGAAGAAGAGTGCTGGCCAGCCATAAGAAGAGCAATCATCATGTGGGCGACTTCG**  
**ATATCTGGAATTGGCGTTCCATTCTTGTACACGGACGACATCAAGTTCCATACCATGTCCTCGGAGTCTTTCT**  
**CTCCACCAGCCTCACGTCGCTGACGGATGATGTCGGTGTAAACCTGGGCCATCTTCTTTTGGACACGGTCACG**  
**CTTGCGGTTGTGTGGGAAGGGGAACCATGGGAACATGAAGTTGATGGCGGCGAAGCCCATGTCGAGATCGGAG**  
**TAGAGTTCCGCAAAGCTGGAATCGAACTTTCCTCGCACCTCCTTGCCCTGTAGAGATCGAGAGGCGGTGTAGA**  
**TGGTGATTTACGCCATGACCTTGTGACGTTGAAAACCTCCGGAGTCGCCCTTGAAGACGGGGGAGGACTCGAA**

GAACTGCTCAACTTCCTTGGTGATCAGGGTGACATAGGATCGGAGAGCTTCAGAGGTGAGGCCGAACTTGACG  
AACTGGTAGACGATTAAATTAGCAATGGAGGCCAGGAGATGTAGACGGGAATAAATTGCTGTACACACCTTC  
TTCTGCTCCATGAGCTTGGAGTTTGGGCAATCATAACCACATGTCGTCCGAACACTGGGGTGGTGAGGGGGG  
AGTAGACATCCTCCGCGCAAACATCCTTGAGCTTGCCGTTCAAATGAAATCATTTCCCTTTGTACCGAGAAA  
AACAGTCGTCTTCTTGCCAGCAGTATGAATGTGAAGATGTCTCCATACTAGAGTACCGAAATTATTTATACG  
TTAGCTTTGCGCAACCTGGTATATAGCTAAGTTGAATTGCACCACTAACCTTCTCCTTGCAGTCGTCAAAGA  
ACTTGTACGGGTCAATTCCATAGGAGATCGTGCTTCCAATGACCGGAACCCAGTGGAAG

[Read No.m64281e\_230311\_112734/4915739/ccs] [Sense (+) strand]

AAT~ACC (5'UTR)

ATG~TAG (*chkB* protein kinase genomic DNA) (Forward sequence)

ATG~TGA (*TinCYP51B* gene) (Forward sequence)

TAA~GCT (3'UTR)

CTA~CAT (*FYV4* genomic DNA) (Reverse sequence)

CGT~ (Downstream sequence of the 7374 block)

TACAGTACCGTACGCCCTTGCATAAAATGCGAGTTCGATCTCAAGATGCAACTTTTTTTTTCCCTTGCTTCG  
TCCGCAGCAGCTTCAAGGCATTCATCACAAACAACGAACAAGTCTTGAGCGGAAGCAGGAGGATAAGACGATC  
ACCATGGGCTCTTAGCCGACATTGTCTCTCGTTTTCTGCGAGAAGTCTCGACCCTGTCCACCGCCGCGCTCG  
TCGCAAGTGCCGTATCGGCTTTTATCGTCTCTCCATTGTTATCAACGTCCTGCAGCAGCTCCTGTTCAAGGA  
CCCTACAAAGCCTCCGGTGGTCTTCCACTGGGTTCCGGTCATTGGAAGCACGATCTCCTATGGAATTGACCCG  
TACAAGTTCTTTGACGACTGCAAGGAGAAGTTAGTTGGTGCAATTCAACTTAGCTATATACCAGGTTGCGCA  
AAGCTAACGTATAAATAATTTCCGTA CTCTAGTATGGAGACATCTTCACATTCATACTGCTGGGCAAGAAGAC  
GACTGTTTTTCTCGGTACAAAGGAAATGATTTCAATTTTGAACGGCAAGCTCAAGGATGTTTGC GCGGAGGAT  
GTCTACTCCCCCTCACCACCCAGTGTTTCGGACGACATGTGGTGTATGATTGCCCAAACCTCCAAGCTCATGG  
AGCAGAAGAAGGTGTGTACAGCAATTTATTCCCGTCTACATCTCCTGGGCCTCCATTGCTAATTTAATCGTCT  
ACCAGTTCGTCAAGTTCGGCTCACCTCTGAAGCTCTCCGATCCTATGTCACCCTGATCACCAAGGAAGTTGA  
GCAGTTCTTCGAGTCTCCCCGTCTTCAAGGGCGACTCCGGAGTTTTCAACGTCAGCAAGGTCATGGCTGAA  
ATCACCATCTACACCGCCTCTCGATCTCTACAGGGCAAGGAGGTGCGAGGAAAGTTCGATTCCAGCTTTGCGG  
AACTCTACTCCGATCTCGACATGGGCTTCGCCGCCATCAACTTCATGTTCCCATGGTTCCCTTCCCACACAA  
CCGCAAGCGTGACCGTGCTCAAAGAAGATGGCCAGGTTTACACCGACATCATCCGTCAGCGACGTGAGGCT  
GGTGGAGAGAAAAGACTCCGAGGACATGGTATGGAACCTTGATGTTCGTCCGTGTACAAGAATGGAACGCCAATTC  
CAGATATCGAAGTCGCCACATGATGATTGCTCTTCTTATGGCTGGCCAGCACTCTTCTTCCCTCCACCGGCTC  
CTGGATCGTTCTCCGCTTGCCAGCCGTCCAGATATTCTCGAGGAACTCTACGAGGAACAGAAACGTGTTCTC  
GGCGAGGATCTTCCACCACTCACCTACGAATCTCTCCAGAACTTGATCTTCAACAATGTAATCAAGGAGA  
CTCTCCGCCTCCACGCTCCCATCCACTCTATCCTCCGTGCTGTTAAATCCCCTATGCCCGTTGAAGGAACTAA  
CTATGTTGTCCCAACCTCTCACAACTCCTTGCCGCTCCTGGTGTTCCTCACGAGACCCTCAGTACTTCCCT



GACCCTCTTGTGGAACCTCACCGATGGGAGAACAACGTCGGTGTACCGTAGTCGAGGCCAGTGAAGAAA  
AGACAGATTACGGATACGGTTTGGTTAGCAAGGGTGCCAACAGCCCTTACCTCCCATTTCGGCTCAGGCAGACA  
CAGATGCATCGGTGAACAATTTGCATATGTTTCAGCTTGAACCGTAACAGCTACGTTAGCCAGACTAATGAAA  
TGGAAGCAAGTTGAAGGCACCAAAGATGTTGTGCCGCCAACTGACTATTCGGTAAGTTTGGCATATTACGCTC  
CTTTTTATTTTGTCTCGATTTTACTAACTTTGCATTAATAGTCCCTCTTCTCGAAGCCCCCTGGCGACCCAATG  
GTCTCGTGGGAGAAGCGAAAGCAGCCTTCCCAGAAATGA TAATCACGACTGCGGATTGAATCATGTTAAATTT  
CTTGCTTCTTGCTAATTTATTTCTTCTTTTCTTACGTTTATACACCGAGCCATATTTGCACTTTATGGTCA  
CGCAAATAGGTTTTCGGAATAGAGCATATGTAATAAAAACTTTCTTTTGACCATGCTTTTGAAGATGGGGAT  
GTAGATAATAGTATTATTCTAATACAGCCATTTATTACAATACTCTAGATGAACAGGAAAGTTGCAGTTACTC  
CGTTAGCTTTGGTGCAGAAAACAAAATGGTAATATACATTGGAAATAGTACATCTTCCCGTAGCTGGGATAATC  
TAGCATCTAAACAGCGATATCCAAGCCAGTAATGTCAGGAAGTAACCAGCCAGCAACGTCGTTAATCCCGTGC  
CCCCTTTCAACTCCGACGCTACAAAACGCCTAAGCAGCTGCCTGAGCATTCTCTCTCCGCCAACGCTCTCT  
TCGCTCTGATCTCCTTCTGTCTTCTCTGACCACCGTCAATCTTTCTGCCACGCTTATGCTCCACATGCCATC  
AGTAACCTGAACCTTGACGGCGGTACTCCATGTGTTTGAATAATCTGAGCATAACGGCCCCTTGATCATATTC  
CCGTGGTGCAATTTATAATGGGCAAACCTTTTGTAGTGGCTTGAAGTATCCTTGAGCTCTGTTTCGCCCTGGTG  
GTAGATTGACAATCGCATAACGCATTCCAGGTGTAAGGGTAGCGGTGCCCATTTGTGCTAACATCTAGGGACTC  
TCCGTCCGTGGCATTGGTAGTTTTTGCACCTTTTACTTTTTCGACGGGGACCTCAACAGCTCTCAGCTCAGCA  
ACACCGTCAACAACGTTTTTCGAAATCACCTCCTGGGCCGTAGTCCTGTGTCTGAATTTCTCTCTCCACCGCA  
GTATGTATCGTCTGTCCCTTGTCAATTTCTATGCCCAATTCTCGAAGCTCAGCCGAGTCCGCTGTAAACAATTG  
CTTCCATCCGGTGATTTTGTCTGGAATATCTGGACATGTTTCGCCCAATTAGGCGTAGGAATGTTTCGACATCG  
GGCACGAATGGGGTAGGTGATGGCACTGTTGCGGGTTTTTCGAGATTGATGAAGGTACCGTACGCATGGCTGAT  
AATGGGGGTTTTGTGACGGAAGTGAAGAGCCGTAGTGAAGGGATGTTCTGGCATTAAAGCCCCGGTATGCGCGC  
CGCAGCCATAGTGGTTATATCGCCTTATATCAAACCGTTCAATGTTCGAGATCTGGGGGTGAAGATTTTAATT  
TAGCTCGTGGTGAAGAACACCATCGGCGGGCGTGACGAAAGCGAAAAAGCCACGGCACCAAGGGCCCAGGT  
AAACCGGTAAGGGACTCAAGGCGAGTCAATCCAATGCTCAATGGCGCTGTATAGAAGATGTTCAACTGGTTCT  
TCGACTTCGTTCAAGATTTTGCACAAAATTTGAATTAGGTCCGACGGCCTTAGCTCGGATCAACAAAACGC  
CGATCTCCGGTGAGCTCGGGCCAGCCGAAGCTTCCATCGCAACATTCAAAGATGAAAGACGACGATATATATT  
TTGATAACAAACAAAGCTGTATTGTTGATTGAATACTAGGAGAGCTGCTCAGAGCAGTGTCTCACTCTTGTGC  
CACTCTATCCTTTGTCTCGCGAAATTGGTGAAGCCAATTTGCTTGACATTATGGCAGTGTGCGCCGTTCCC  
TCTCAATTCCCTCCCATCACTACTACCGGTGCTCCAAAGTCGTTAGCGATGAGAAATATTGCTTCTCAAGAGC  
CTCGGACGGCGCCTAGTGGTGATCCTGCAGTTCCTAAGCCCTCCATGCCCGAACAGAGCTGGCGGAGCAGTT  
AAACGCTGATGTACGGCGGAAATATGTCAAAGGTGGGCGGGCAAATACACCCCAACCATTTGGGACCCATAAT  
GCTAACATTTGGTTATTCTGAAAGATAAGAAGCTCGGTGAAGGTACATATGCAGTTGTTTACCTAGGCCATCT  
ACGAGATGATCCCACTTCGCTAATAAAGAGCGACTTCGCATCTTTTCGACAGAAAAAAGGTCGAGCAAGGGA  
AGTTCGCTCAGCCTGGCCTGCCATTGACTCTAAGCGCCGTCGTTCTCTTGCTTGGGGGCTTGCTGCAGCTTGG  
CCTGGGCTTGTCCGGCCTGGAACCTCAGGGAGCCGAAAGATAACTAGTTATTTATTTTCGTCTCCGCACACCTCG  
GCGGCTGTCTCATAGTCGGGATATACATAGTACGGGTAGCAGGTAGACTCACACGCTGCCTCTCTCTGTGTA  
ACTGCTTCTACCACCTTCGACAGCGACACTGTTTCGGTCTTGCAACTACGGTAGAGTGTGTTGGGGCTTGATCT

TGCCTGCCATCGACTTGGAGTTGAAGTTGCGAAGCCATTGGCAGTCCATCCGGGATATTCGTAACCTGCCGTCA  
ACTTCTTACGCCGGGCTAAAAAC**ATGCCTCCGCAGAGGGAGAGAAGCAATCTGAAGAGAGAAAGGGTAAGATA**  
TGAACACGTTATATCCAATTAGTTTCTCAGAAGGATGAAAATATTCAAGCTGCTAACTTCTTTTCCCAAACCT  
GCAGGGCAACGCAGCTCCAGACCATGAATCAAAGAAGCCACGGAGATCTCCTCGAATCTCATCTCAATTGCAG  
CAGGATGCCGGATATCTACCTTCTCCCCTAGCTAATGAAGTAATCTCAGAAGAAAAGCGTGAAGTTGCTACAG  
TTTCTCCCCCAGAAGGCCGCCGAAACCAGGCGCCTCGAGGTCAATCGCCAGACGAGTCGTCATGTCCCACCCA  
GGGTTTCTCTCAGTATCCCCAATCCAATCCATTGACGATGTGGAAGACGAGGTGGCCAGGGCATATGGGGA  
TATCTTACTCCGCTAGATAACAATTTTGGAGGCCAATTGGTTCTGAAGAAGCGGGACAGCACAAATACTACAC  
CGGTAATTGGAGCAGCATCAGACATATCAACGCCGAAAGCAACGCCTCAAACCGTGAAGTGAAGAGATAAA  
CCGCGCTGGATATCTTATAGGCCGGCATGCAGAGTGCGGTATGCCTTTACCCATTGCATACTCTCTGCCGTCT  
AGTGATCAATTGCTAACCATCTGGGTACTGCAGATTTTCAGGATCAAGCTCCCCACGATATCCAACCGCCATTG  
CCTGATATTCCACGAAAACAGGGGAGGAGACTTTGTTGCAATTGTGGAAGATCTCTCTATCAATGGCACTTTC  
ATCAACGACGCCATCATCGGCAAGAACAACGCCGAGAGCTCGAAAACGGCGACGAGATTACCATCCTGCAAG  
AATCCAGATTCATCTTCAACTACCCGCGGAGTTCGGAACACAAGCAAGTTCCGACAGCAGTATAAGCTCTTTGA  
TATGCTGGGTAGGGGACACTTTGCCTCGGTTTATCTATGCGCTGAACGTTCTACGGGGATCAAGTATGCCGTC  
AAACATTTTCGAGAAACGCCGGGCGCAGTTCAGAGGCTAGACCGTGAAGCACTACAGCAAGAGATTTCAATGC  
TGATGAGTGTCAACCATCCGAACATGCTGTGCCTAAAGGATACCTTTGACGAGAGCGATGGTGTCTTCCTGAT  
TCTTGAGCTTTCGCCAGAGGGCGAACTGTTCAACTGGATCATTAGGCATCAGAAACTCAGCGAGGAGGAGACT  
CGAAAAGTATTCATTCAGCTTTTTGAAGGTTTGAAGATACCTGGTATGTGCTTTCGTTTTCTGGTTGATCAGACT  
CATGGCAGTGTATATGGCTAACCGTTGTGCTAGCATGAACGAAACATCATTCACCGTGACATAAAGCCAGAGA  
ACATTTCTGGTTGTCGACAAAGATCTTACCGTAAATTAGCAGACTTCGGCCTTGCAAAGATTGTGCGCGAACA  
CTCCTTTACCACCAGCTGTAAGTTCACCTACCTTCTGCCGTTCAAATCTGGGGTCAATCTTACTAAGAGATC  
ATAAAATCTAGATGTGGAACGCCTGGCTGTAAGTTTCCCTGCTGCTCTGTAAACGCTGGTGTCTTTCATCCACC  
AAATGTGAATCTAACAATTCTTATCAGATGTTGCTCCTGAGATACTGGCAGAAAACGCTGAAGCCAGAATGTA  
CACCCGAGCGGTTGACATCTGGTCACTCGGAGTGGTACTCTACATCTGCCTGTGCGGATTCCTCCTTTCTCA  
GATGAACTGTACCACCAAGAGACTACCCATACACTCAGAAAGAGCAGATCCAGCTCGGAATATTTAAGTATC  
CTCTTCCATACTGGGACTCAATCGATTATAGAGCCATGGACCTTATCGACTCCATGATCGAAGTCGACGTGAA  
GGAGCGTTTGAAAGTAGATGAGTGTCTCCAGCACCCATGGATCACTGGCATCGACCCCGATGAGCCTAGGGTG  
GCAGACAGCACCGATGACCTAGCCGGGGCCATCGGTGGCCTGAGGGTGTCCAAAGAACGCCGGCCAACATATGG  
TCCGCAGGCTGTTGAGTGACATACATGAAGTCACGGTCAAGCAGGTGGTGAAGACCAAGGAAGACGACCCTGC  
TTCCAGGACATAACTATATACCAGAATCATCCTGTGCCTCGAGCCAGGAGCCCAAACCGGCTGGCAACCGG  
AACTCAAAGGAGTTCATGGAACCTCGGTGGAAGTGGAGACCAGGTGTTATTCGATGAGCAGTCTGACGACTCGC  
TGAGGCTTGAGAGTGAGGCACGGAAGCCAGTTGTCCACCAAGACGACGCAGACAAGACTCCACGAGAAAGAAA  
**GAGGTAG**CAGAAGCCCGATCCGTCTTGGGATGGTATTCTGCTAGCTATAACCGTGCTATTCCGGACTTTTGT  
CCAATTCCTTTTTTCGTTTTATATTGATTGTGATCTTTCTTAATTTTTTCTTTAACTATAACCCCCGGTTGAAAG  
GTGATAGGGGGCCAACTAACCGAAAAGCAGCAGAAAAACCGGCTTGGTCGCTGCCTTGGAGACGACGGCGATT  
CTCGTGTTTAGGATTTTCAATTTTTGAGTGATATAACTATGGGTACAATAGCGTCCACTGGGCAATGTAATTACA  
GTCTCTTCTCACTCACCACCGGACAATAATAACAATATTAATATTGACGGACCGTTGATAGCTTAACCTGCCA

TGACTAAGCCGGCCTCCCTGAAGCCGCGATGGCCTGATGATGCGCCACCGTCAGGTCTCGCTCGCTCAGGCA  
GCAGAGAATCCAGCGGAGGAGATGACGCCCTGCACGAACACCGTCCAGGGACCGTCTCCGCCCGTTCGCGAGC  
TCGAATTGTAATCATCTCGACGGCCGTTGGCCTGCTCGCCGCAAGGGAGAAAAAGGGGGCAGAAGGGCAGCG  
GTAATTTTGGTATTGGAGATGCAGCTGTAAACCAATAAAAAACGACGTAAAATACCAGGAACAATGCATTATC  
TTACAGTACCGTACGCCCTTGCATAAAATGCGAGTTCGATCTCAAGATGCAACTTTTTTTTTTCCCTTGCTTC  
GTCCGCAGCAGCTTCAAGGCATTCATCACAAACAACGAACAAGTCTTGAGCGGAAGCAGGAGGATAAGACGAT  
CACCATGGGCCTCTTAGCCGACATTGTCTCTCGTTTCTGCGAGAAGTCTCGACCCCTGTCCACCGCCGCGCTC  
GTCGCAAGTGCCGTATCGGCTTTTATCGTCCTCTCCATTGTTATCAACGTCCTGCAGCAGCTCCTGTTCAAGG  
ACCCTACAAAGCCTCCGGTGGTCTTCCACTGGGTTCGGTTCATTGGAAGCACGATCTCCTATGGAATTGACCC  
GTACAAGTTCTTTGACGACTGCAAGGAGAAGGTTAGTTGGTGAATTCAACTTAGCTATATAACCAGGTTGCGC  
AAAGCTAACGTATAAATAAATTCGGTACTCTAGTATGGAGACATCTTCACATTCATACTGCTGGGCAAGAAGA  
CGACTGTTTTTCTCGGTACAAAGGGAAATGATTTTCAATTTTGAACGGCAAGCTCAAGGATGTTTTCGCGGAGGA  
TGTCTACTCCCCCTCACCCAGTGTTCGGACGACATGTGGTGTATGATTGCCCAAAGTCCAAAGTTCATG  
GAGCAGAAGAAGGTGTGTACAGCAATTTATTCCCGTCTACATCTCCTGGGCCTCCATTGCTAATTTAATCGTC  
TACCAGTTCGTCAGTTCGGCCTCACCTCTGAAGCTCTCCGATCCTATGTCACCCTGATCACCAAGGAAGTTG  
AGCAGTTCCTCGAGTCTCCCCGCTTTCAAGGGCGACTCCGGAGTTTTCAACGTCAGCAAGGTCATGGCTGA  
AATCACCATCTACCCGCTCTCGATCTCTACAGGGCAAGGAGGTGCGAGGAAAGTTCGATTCCAGCTTTGCG  
GAACTCTACTCCGATCTCGACATGGGCTTCGCCGCCATCAACTTCATGTTCCCATGGTTCCCCTTCCCACACA  
ACCGCAAGCGTGACCGTGTCAAAGAAGATGGCCAGGTTTACACCGACATCATCCGTCAGCGACGTGAGGC  
TGGTGGAGAGAAAGACTCCGAGGACATGGTATGGAAGTTCGATGTCGTCCGTGTACAAGAATGGAACGCCAATT  
CCAGATATCGAAGTCGCCACATGATGATTGCTCTTCTTATGGCTGGCCAGCACTCTTCTTCCCTCCACCGGCT  
CCTGGATCGTTCTCCGCCTTGCCAGCCGTCCAGATATTCTCGAGGAACTCTACGAGGAACAGAAACGTGTTCT  
CGGCGAGGATCTTCCACCACTCACCTACGAATCTCTCCAGAACTTGATCTTCAACAATGTAATCAAGGAG  
ACTCTCCGCCTCCACGCTCCCATCCACTCTATCCTCCGTGCTGTTAAATCCCCTATGCCCGTTGAAGGAACTA  
ACTATGTTGTCCCAACCTCTCACAACCTCCTTGCCGCTCCTGGTGTTCCTCACGAGACCCTCAGTACTTCCC  
TGACCCTCTTGTTTGAACCCCTCACCGATGGGAGAACACGTCGGTGTACCGTAGTCGAGGCCAGTGAAGAA  
AAGACAGATTACGGATACGGTTTGGTTAGCAAGGGTGCCAACAGCCCTTACCTCCCATTCGGCTCAGGCAGAC  
ACAGATGCATCGGTGAACAATTTGCATATGTTTCAAGCTTGGAAACGTAACAGCTACGTTAGCCAGACTAATGAA  
ATGGAAGCAAGTTGAAGGCACCAAAGATGTTGTGCCGCAACTGACTATTCGGTAAGTTTGGCATATTACGCT  
CCTTTTTATTTTGTCTGATTTTACTAACTTTGCATTAATAGTCCCTCTTCTCGAAGCCCCTTGGCGACCCAAT  
GGTCTCGTGGGAGAAGCGAAAGCAGCCTTCCCAGAAATGATAATCACGACTGCGGATTGAATCATGTTAAATT  
TCTTGCTTCTTGCTAATTTATTTCTTCTCTTTTCTTACGTTTATACACCGAGCCATATTTGCACTTTATGGTC  
ACGCAAATAGGTTTTCGGAATAGAGCATATGTAATAAAAACTTTCTTTTGGACCATGCTTTTGAAGATGGGGGA  
TGTAATAATAGTATTATTCTAATACAGCCATTTATTACAATACTCTAGATGAACAGGAAAGTTGCAGTTACT  
CCGTTAGCTTTGGTGCAGAAACAAAATGGTAATATACATTGGAATAGTACATCTTCCCCTAGCTGGGATAAT  
CTAGCATCTAAACAGCGATATCCAAGCCAGTAATGTCAGGAAGTAACCAGCCAGCAACGTCGTTAATCCCCTG  
CCCCCTTCAACTCCGACGCTACAAAACGCTAAGCAGCTGCCTGAGCATTCCTCCTCTCCGCCAACGCTCTC  
TTCGCTCTGATCTCCTTCTGTCTTCTCTGACCACCGTCAATCTTTCTGCCACGCTTATGCTCCCACATGCCAT

CAGTAACCTGAACCTTGACGGCGGTACTCCATGTGTTTGAATAATCTGAGCATACGGCCCTTGATCATATT  
CCCGTGGTGCATTTATAATGGGCAAACCTTTTGTAGTGGCTTGAAGTATCCTTGAGCTCTGTTTCGCCTGGT  
GGTAGATTGACAATCGCATAACGCATTCCAGGTGTAAGGGTAGCGGTGCCATTGTGCTAACATCTAGGGACT  
CTCCGTCGGTGGCATTGGTAGTTTTTGCACCTTTTACTTTTCGACGGGGACCTCAACAGCTCTCAGCTCAGC  
AACACCGTCAACAACGTTTTTCGAAATCACCTCCTGGGCCGTAGTCCTGCTGTCTGAATTTCTCTCTCCACCGC  
AGTATGTATCGTCTGTCCCTTGTCAATTTCTATGCCCAATTCTCGAAGCTCAGCCGAGTCCGCTGTAAACAATT  
GCTTCCATCCGGTGATTTTTGCTGGAATATCTGGACATGTTTCGCCCAATTAGGCGTAGGAATGTTTCGACATC  
GGGCACGAATGGGGTAGGTGATGGCACTGTTGCGGGTTTTTCGAGATTGATGAAGGTACCGTACGCATGGCTGA  
TAATGGGGTTTTGTGACGGAAGTGAAGAGCCGTAGTGGAAGGGATGTTCTGGCATTAAAGCCCGGTATGCGCG  
CCGCAGCCATAGTGGTTATATCGCCTTATATCAAACCGTTCAATGTGAGATCTGGGGGGTGAAGATTTTAAAT  
TTAGCTCGTGGTGTAAAGAACACCATCGGCGGGCGTGACGAAAGCGAAAAAGCCACGGCACCAAGGGCCAGG  
TAAACCGGTAAGGGACTCAAGGCGAGTCAATCCAATGCTCAATGGCGCTGTATAGAAGATGTTCAACTGGTTC  
TTCGACTTCGTTCAAGATTTTTGCACCAAAAATTTGAATTAGGTCCGACGGCCTTAGCTCGGATCAACAAAACG  
CCGATCTCCGGTGAGCTCGGGCCAGCCGAAGCTTCCATCGCAACATTCAAAGATGAAAGACGACGATATATAT  
TTTGATAACAAAACAAGCTGTATTGTTGATTGAATACTAGGAGAGCTGCTCAGAGCAGTGTCTCACTCTTGTG  
CCACTCTATCCTTTGTCTCGCGAAATTGGTGAAGCCAATTTGCTTACATTATGGCAGTGTGCGCGCTTCC  
CTCTCAATTCCTCCCATCACTACTACCGGTGCTCCAAAGTCGTTAGCGATGAGAAATATTGCTTCTCAAGAG  
CCTCGGACGGCGCCTAGTGGTGTCTGCAGTTCCTAAGCCCTCCATGCCCGAACAGAGCTGGCGGAGCAGT  
TAAACGCTGATGTACGGCGGAAATATGTCAAAGGTGGGCGGGCAAATACCCCCAACCAATTGGGACCCATAA  
TGCTAACATTTGGTTATTCTGAAAGATAAGAAGCTCGGTGAAGGTACATATGCAGTTGTTTACCTAGGCCATC  
TACGAGATGATCCCACTTCGCTCGTTGCAATCAAGAAAATAAACTAAACGCCGAGTACAAGGACGGGCTATC  
CATGGACGCCATCCGTGAAGTAAAGTACCTTCAGGAACTGTCTCACCCGAACGTAATTGCGTTGCATGACGTT  
TTCTCCTCAAAGGATCAAAATCTAAACCTCGTCCTTGAATTTTTTACCCCTTGGAGATCTTGAATGTTGATCA  
AAGACAACCTCTATCCAGTACGGTGTGGCTGATATAAAAGCATGGATAAGCATGCTTGCACGTGGAGTGTGGTT  
CTGTCATAAGAAATTCATTCTACACCGTGATATTAAGCCTAACAACCTTATTAATTGCATCGGATGGAGAAGTT  
AAATTAGCGGATTTTGGTCTTGCCAGATCCTTTGCCGATCCATATCTCAACATGACACATCAAGTCATCACA  
GATGGTACAGGCCATTAGAACTACTCTTCGGCGCCAGGCAATATTCCGGTGCAGTCGACATATGGTCTATGGG  
AATGGTGTTCGCTGAGCTTATTCTGCGCGTTCATTTCGCCGCTGGAAACACGGATATGGACCAAATATCTAAA  
ATTTGTGCTGCATTTGGGGCACCTACGGAAGAAAACCTGGCCTGGGGTGACAAAGCTGCCCAACTACGTCCCAA  
TCGAGGAAAACCATGTCATACCCCTACAAGGCCGCAATTCCTCCTCCGCCAATTTCCGACAGCTGGACCTTT  
GGGGCCGATCTACTTGCTCCATGTTAAAACCTGATCCAAGGAAACGAATTACGGCCACTCAAGTCTTGACG  
CATCAGTGGTGGCTTGTGAGCCTAAACCAACTAAGAACGAGGACCTGCCTAGGAAATCAGGAGGAGAAAAGA  
AAATGGGCAACGATATGGGCAGACGAGTTGGTGAAGATTGACGAGTCAAAAATTTAAAGGAGTGTCCCGTCAACT  
TGATTTTCGGAGCTATGAAGAAATGAGAGGATCCGACTTGCCATCCGGAATATAATACTCAAAAATTTCTGCCT  
CCTTGGTTAGCAAGCGAGCAGATATCGCGTACCGACAAAATATGCTACAAGAAGAAGTGTACACAACATTC  
TGGGCCGCTCCTCTTTGTGGGTGCAATGCTGTGTAAACATCGGCCTCAATGAGAGCCCAATTTGGTTAATGAG  
CTGCAGCCTTACCAATACGGAGGAGACGTCAGTAGC
